# Supplementary material for: Investigation of clinical characteristics and genome associations in the ‘UK Lipoedema’ cohort
Source: PubMed Central journal article supplement (PMC9560129; doi:10.1371/journal.pone.0274867), 2022-10-13

**S2 Fig.** Plot of the SNPs showing evidence of colocalization from LocusFocus.

**A.**

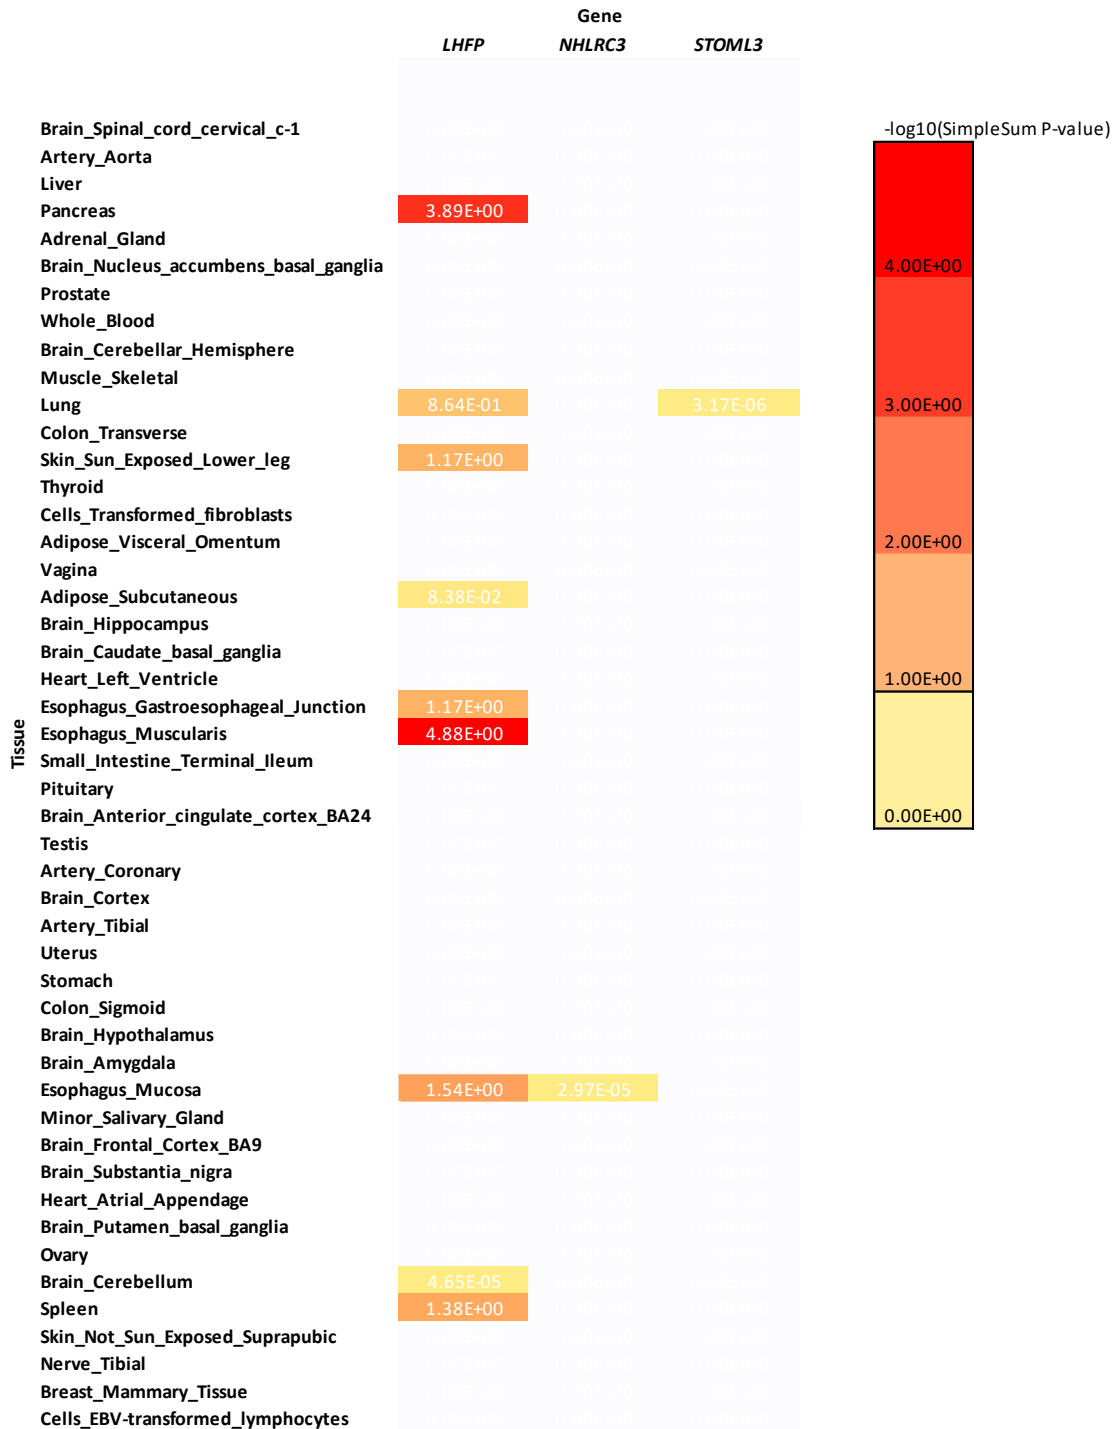

**B.**

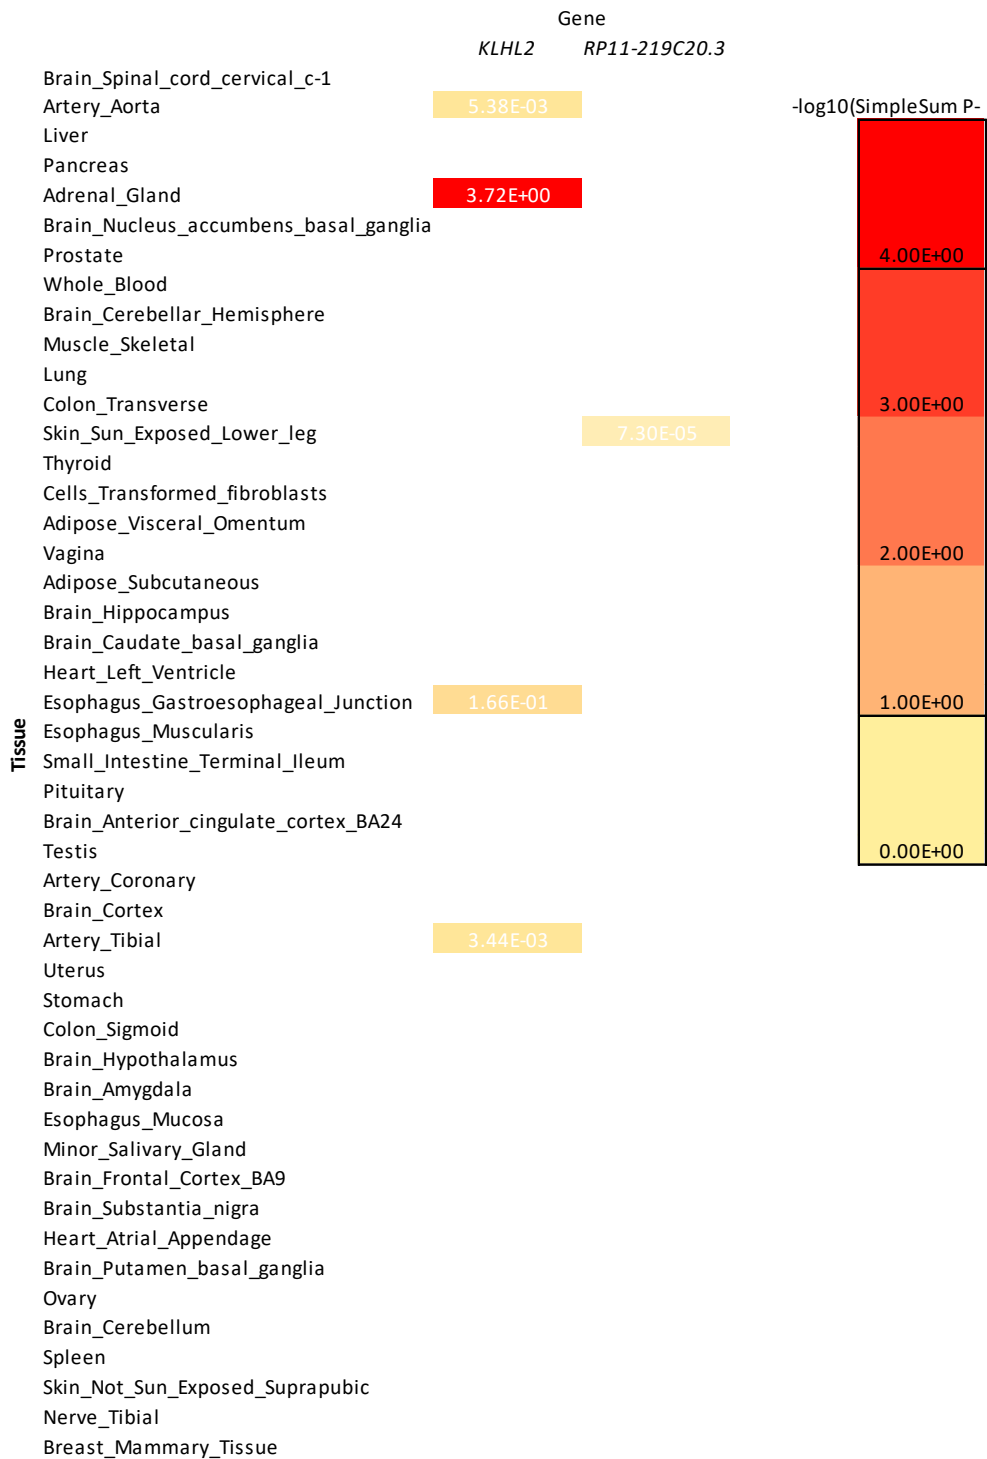

Supplement: pone.0274867.s011.pdf [file pone.0274867.s011.pdf]
