# Supplementary material for: Investigation of clinical characteristics and genome associations in the ‘UK Lipoedema’ cohort
Source: PubMed Central journal article supplement (PMC9560129; doi:10.1371/journal.pone.0274867), 2022-10-13

**S3 Fig.** Radar diagram showing the mean score for each of the 8 domains from the SF-36 Quality of Life questionnaire.

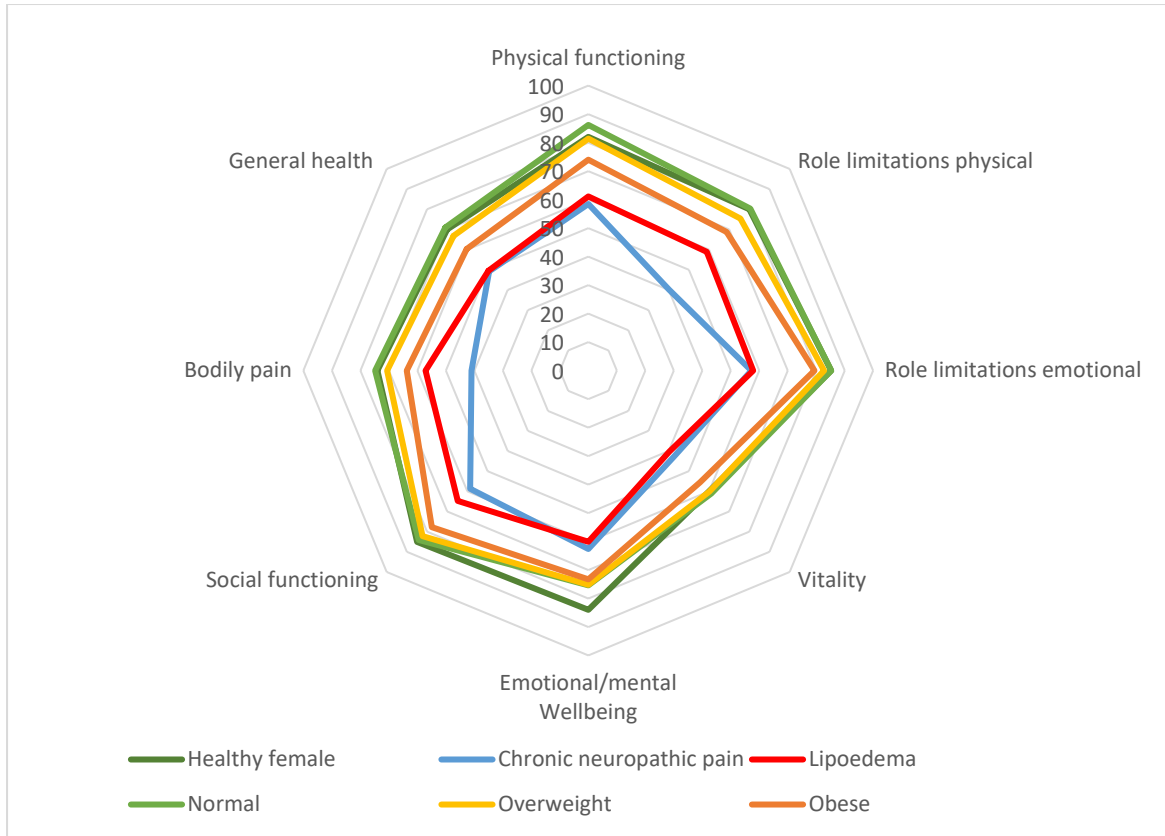

Supplement: pone.0274867.s012.pdf [file pone.0274867.s012.pdf]
