# Supplementary material for: Investigation of clinical characteristics and genome associations in the ‘UK Lipoedema’ cohort
Source: PLoS One. 2022 Oct 13;17(10):e0274867. doi: 10.1371/journal.pone.0274867 (PMC9560129; doi:10.1371/journal.pone.0274867)
Supplement: S5 Table — The variants have been annotated to their nearest genes. Effect sizes and P values are shown for both studies and meta-analysis. Direction column shows whether the discovery and replication study follow the same direction of effect. (XLSX) [file pone.0274867.s006.xlsx]

## Sheet: S5 Table
SNP								DISCOVERY STUDY																			REPLICATION STUDY																				META-ANALYSIS
ID	CHR	POS_HG19	POS_HG38	Nearest_Genes(Upstream;Downstream)	Annotation	REG	A1	A1_CASE_CT	A1_CTRL_CT	CASE_ALLELE_CT	CTRL_ALLELE_CT	CASE_NON_A1_CT	CASE_HET_A1_CT	CASE_HOM_A1_CT	CTRL_NON_A1_CT	CTRL_HET_A1_CT	CTRL_HOM_A1_CT	OBS_CT	BETA	Z_STAT	OR	SE	L95	U95	P_glm	P_assoc	A1_CASE_CT	A1_CTRL_CT	CASE_ALLELE_CT	CTRL_ALLELE_CT	CASE_NON_A1_CT	CASE_HET_A1_CT	CASE_HOM_A1_CT	CTRL_NON_A1_CT	CTRL_HET_A1_CT	CTRL_HOM_A1_CT	OBS_CT	BETA	Z_STAT	OR	SE	L95	U95	STAT	P_glm	P.assoc	Allele1	Allele2	Direction
rs7369041	2	213585180	212720456	AC079610.1	non-coding intronic	T	G	41	843	260	10784	92	35	3	4579	783	30	5522	0.800444	4.55545	2.227	0.1757	1.578	3.142	5.22729e-06	5.227e-06	2	1772	54	22816	25	2	0	9714	1616	78	11435	-0.777264	-1.08104	0.4597	0.719	0.1123	1.881	-1.081	0.27968	0.2797	t	g	+-
rs12607763	18	71498948	73831713	RN7SL401P;RP11-25L3.3	None	A	G	57	1372	260	10802	79	45	6	4113	1204	84	5531	0.661957	4.30719	1.939	0.1537	1.434	2.62	1.6534e-05	1.655e-05	5	2947	54	22818	23	3	1	8622	2627	160	11436	-0.381487	-0.804949	0.6828	0.4739	0.2697	1.729	-0.805	0.420849	0.4208	a	g	+-
rs1409440	13	39685567	39111430	NHLRC3;NXT1P1	None	T	C	45	1002	260	10788	91	33	6	4439	908	47	5524	0.709994	4.25164	2.034	0.167	1.466	2.822	2.12207e-05	2.121e-05	9	2138	54	22818	20	5	2	9379	1922	108	11436	0.651994	1.79504	1.919	0.3632	0.9418	3.911	1.795	0.072647	0.07265	t	c	++
rs7994616	13	39709095	39134958	NHLRC3;NXT1P1	None	T	C	45	1003	260	10800	91	33	6	4445	907	48	5530	0.708293	4.24985	2.031	0.1667	1.465	2.815	2.13913e-05	2.154e-05	9	2140	54	22818	20	5	2	9375	1928	106	11436	0.652845	1.7942	1.921	0.3639	0.9415	3.92	1.794	0.0727817	0.07278	t	c	++
rs11616618	13	39714151	39140014	NHLRC3;NXT1P1	None	G	A	45	1006	260	10802	91	33	6	4443	910	48	5531	0.705773	4.23154	2.025	0.1668	1.461	2.809	2.32092e-05	2.32e-05	9	2148	54	22818	20	5	2	9369	1932	108	11436	0.647742	1.78191	1.911	0.3635	0.9373	3.897	1.782	0.0747643	0.07477	a	g	++
rs2019845	13	82968893	82394758	PTMAP5;GYG1P2	None	C	T	36	744	260	10802	98	28	4	4683	692	26	5531	0.770564	4.20468	2.161	0.1833	1.509	3.095	2.61455e-05	2.615e-05	6	4154	14	10070	2	4	1	1619	2678	738	5042	0.073071	0.134659	1.076	0.5693	0.3525	3.283	0.1284	0.892882	0.8979	t	c	++
rs9308098	4	166080237	165159085	TMEM192	intronic	T	C	54	1227	260	10446	84	38	8	4106	1007	110	5353	0.623627	4.19536	1.866	0.1488	1.394	2.498	2.72436e-05	2.788e-05	9	2896	54	22818	18	9	0	8687	2548	174	11436	0.322069	0.876071	1.38	0.3676	0.6713	2.837	0.8761	0.380991	0.381	t	c	++
rs4906474	14	43940307	43471104	HNRNPUP1;KRT8P2	None	T	C	101	2931	258	10774	51	55	23	2858	2127	402	5516	0.539602	4.17747	1.715	0.1292	1.332	2.21	2.94772e-05	2.948e-05	14	6409	54	22818	14	12	1	5908	4593	908	11436	-0.109367	-0.352316	0.8964	0.3104	0.4878	1.647	-0.3523	0.724602	0.7246	t	c	+-
rs10767567	11	26701172	26679625	SLC5A12	intronic	C	T	44	993	260	10800	89	38	3	4450	907	43	5530	0.705606	4.14693	2.025	0.1702	1.451	2.827	3.36962e-05	3.368e-05	0	2072	54	22818	27	0	0	9434	1878	97	11436	-2.38358	-1.69342	NA	NA	NA	NA	NA	0.0903756	NA	t	c	+?
rs1011903	1	94143719	93678163	BCAR3	intronic	C	T	73	1931	260	10798	67	53	10	3645	1577	177	5529	0.580248	4.14708	1.786	0.1401	1.357	2.351	3.36746e-05	3.452e-05	5	4082	54	22818	22	5	0	7698	3340	371	11436	-0.756546	-1.61182	0.4693	0.4694	0.187	1.178	-1.612	0.107	0.107	t	c	+-
rs226665	20	24764183	24783547	RP5-860P4.2;CST7	None	C	T	108	3245	260	10790	41	70	19	2638	2269	488	5525	0.503601	3.93399	1.655	0.128	1.288	2.127	8.35469e-05	8.351e-05	11	6970	54	22818	17	9	1	5523	4802	1084	11436	-0.538069	-1.59577	0.5839	0.3372	0.3015	1.131	-1.596	0.110541	0.1105	t	c	+-
rs226672	20	24770558	24789922	RP5-860P4.2;CST7	None	A	G	85	4888	260	10802	56	63	11	1651	2612	1138	5531	-0.520947	-3.93115	0.594	0.1325	0.4581	0.7701	8.45396e-05	8.455e-05	25	9985	54	22818	7	15	5	3598	5637	2174	11436	0.102938	0.375945	1.108	0.2738	0.6481	1.896	0.3759	0.706958	0.707	a	g	-+
rs10486281	7	9022706	8983076	AC009500.2;RP4-668E10.2	None	C	T	94	2722	260	10802	49	68	13	3042	1996	363	5531	0.51067	3.92823	1.666	0.13	1.292	2.15	8.5574e-05	8.553e-05	12	5892	54	22818	17	8	2	6267	4392	750	11436	-0.198372	-0.60413	0.8201	0.3284	0.4309	1.561	-0.6041	0.545757	0.5457	t	c	+-
rs7161673	14	43721070	43251867	RP11-16O13.1;RP11-88E18.1	None	T	G	99	2915	260	10788	52	57	21	2864	2145	385	5524	0.510716	3.92136	1.666	0.1302	1.291	2.151	8.80495e-05	8.81e-05	15	6340	54	22818	13	13	1	5967	4544	898	11436	-0.0003623	-0.0011953	0.9996	0.3031	0.5519	1.811	-0.0012	0.999046	0.9991	t	g	+-
rs317826	18	55323945	57656713	RP11-35G9.3	non-coding intronic	G	A	101	2988	260	10802	47	65	18	2832	2150	419	5531	0.505476	3.91904	1.658	0.129	1.287	2.135	8.89019e-05	8.894e-05	16	6391	54	22818	12	14	1	5893	4641	875	11436	0.0797911	0.26613	1.083	0.2998	0.6018	1.949	0.2661	0.790139	0.7901	a	g	++
rs16825349	2	146425531	145667963	AC079163.1;AC079248.1	None	A	G	72	1953	260	10802	73	42	15	3619	1611	171	5531	0.551568	3.90756	1.736	0.1412	1.316	2.289	9.3232e-05	9.323e-05	13	4276	54	22818	17	7	3	7549	3444	416	11436	0.315068	0.994065	1.37	0.3169	0.7363	2.55	0.994	0.320191	0.3202	a	g	++
rs10887273	10	86066840	84307084	LINC00858;CCSER2	None	T	C	62	1609	260	10802	80	38	12	3913	1367	121	5531	0.576097	3.90625	1.779	0.1475	1.332	2.375	9.37378e-05	9.374e-05	8	3434	54	22818	19	8	0	8260	2864	285	11436	-0.0181557	-0.0477547	0.982	0.3802	0.4661	2.069	-0.0477	0.961912	0.9619	t	c	+-
rs10264696	7	145048455	145351362	AC004911.2;AC073055.2	None	A	G	83	2352	260	10800	54	69	7	3290	1868	242	5530	0.534434	3.89875	1.706	0.1372	1.304	2.233	9.66922e-05	9.803e-05	12	4991	54	22818	16	10	1	6946	3935	528	11436	0.020509	0.0622862	1.021	0.3293	0.5353	1.946	0.0623	0.950335	0.9503	a	g	++
rs6957243	7	27440061	27400442	AC004009.3	non-coding intronic	C	T	117	3598	260	10800	43	57	30	2401	2400	599	5530	0.491892	3.89942	1.635	0.1263	1.277	2.095	9.64242e-05	9.867e-05	18	7606	54	22818	12	12	3	5075	5062	1272	11436	-1.1e-06	-3.8e-06	1	0.2888	0.5678	1.761	0	0.999997	1	t	c	+
rs11511253	10	38973500	38680369	SLC9B1P3	non-coding intronic	G	A	82	2321	260	10802	58	62	10	3315	1851	235	5531	0.531932	3.87231	1.702	0.1374	1.3	2.228	0.000107807	0.0001078	16	4959	54	22818	12	14	1	6968	3923	518	11436	0.42169	1.4028	1.525	0.3006	0.8458	2.748	1.403	0.160676	0.1607	a	g	++
rs9469670	6	33975810	34008033	MIR1275;GRM4	None	A	C	61	1592	260	10800	75	49	6	3924	1360	116	5530	0.57509	3.84871	1.777	0.1495	1.326	2.382	0.00011874	0.0001198	7	3439	54	22818	20	7	0	8219	2941	249	11436	-0.176432	-0.433644	0.8383	0.4069	0.3776	1.861	-0.4336	0.664547	0.6645	a	c	+-
rs11661989	18	76021858	78261858	RP11-100K18.1;RP11-451L19.1	None	A	G	108	3285	260	10790	45	62	23	2580	2345	470	5525	0.497981	3.84048	1.645	0.1297	1.276	2.121	0.000122792	0.0001228	13	6896	54	22818	15	11	1	5557	4808	1044	11436	-0.311694	-0.978478	0.7322	0.3186	0.3922	1.367	-0.9785	0.327838	0.3278	a	g	+-
rs6547889	2	29128322	28905456	WDR43	intronic	C	T	30	623	260	10792	103	24	3	4786	597	13	5526	0.768362	3.82253	2.156	0.2011	1.454	3.198	0.000132091	0.000133	4	1326	54	22818	23	4	0	10118	1256	35	11436	0.261514	0.500677	1.299	0.5223	0.4666	3.616	0.5007	0.616598	0.6166	t	c	++
rs7592412	2	165526338	164669828	COBLL1	non-coding intronic	T	C	120	3762	260	10792	34	72	24	2255	2520	621	5526	0.48679	3.80317	1.627	0.1284	1.265	2.093	0.000142854	0.0001498	22	8133	54	22818	9	14	4	4726	5233	1450	11436	0.216194	0.779643	1.241	0.2773	0.7209	2.138	0.7796	0.435601	0.4356	t	c	++
rs13389321	2	230177257	229312541	PID1;DNER	None	T	C	29	596	260	10800	103	25	2	4821	562	17	5530	0.761881	3.78296	2.142	0.2014	1.444	3.179	0.000154973	0.000155	1	1313	54	22818	26	1	0	10133	1239	37	11436	-1.17524	-1.16358	0.3087	1.01	0.0427	2.235	-1.164	0.244595	0.2446	t	c	+-
rs11099970	4	155933753	155012601	RBM46;RP11-92A5.2	None	C	T	93	5168	260	10798	53	61	16	1500	2630	1269	5529	-0.488847	-3.7722	0.6133	0.1296	0.4758	0.7907	0.000161812	0.0001619	27	10951	54	22818	4	19	4	3132	5603	2674	11436	0.0791262	0.292594	1.082	0.2704	0.6371	1.839	0.2926	0.769832	0.7698	t	c	-+
[truncated: 3 more columns]
