# Supplementary material for: Investigation of clinical characteristics and genome associations in the ‘UK Lipoedema’ cohort
Source: PLoS One. 2022 Oct 13;17(10):e0274867. doi: 10.1371/journal.pone.0274867 (PMC9560129; doi:10.1371/journal.pone.0274867)
Supplement: S6 Table — Data was downloaded from UCSC Table Browser using the geneHancerClusteredInteractionsDoubleElite (last updated: 2019-01-15) and encodeCcreCombined (last updated: 2020-05-20) tables. (XLSX) [file pone.0274867.s007.xlsx]

## Sheet: S6 Table
ENCODE cCREs - ENCODE Candidate Cis-Regulatory Elements (cCREs) combined from all cell types
chrom	chromStart	chromEnd	snp_in_region	name	score	strand	thickStart	thickEnd	reserved	ccre	encodeLabel	zScore	ucscLabel	accessionLabel	description
chr13	39111153	39111496	rs1409440	EH38E1669206	343	.	39111153	39111496	255,205,0	dELS,CTCF-bound	dELS	3.43354	enhD	E1669206	EH38E1669206 distal enhancer-like signature
GeneHancer - GeneHancer Regulatory Elements and Gene Interactions v2
chrom	chromStart	chromEnd	snp_in_region	name	score	value	geneAssociationMethods	color	geneHancerChrom	geneHancerStart	geneHancerEnd	geneHancerIdentifier	geneHancerStrand	geneChrom	geneStart	geneEnd	geneName
chr13	39035480	39603528	rs1409440, rs7994616, rs11616618	LHFPL6/GH13J039035	14	30.93	eQTLs,TF_co-expression	217,83,25	chr13	39035480	39041266	GH13J039035	.	chr13	39603527	39603528	LHFPL6
