# Supplementary material for: Investigation of clinical characteristics and genome associations in the ‘UK Lipoedema’ cohort
Source: PLoS One. 2022 Oct 13;17(10):e0274867. doi: 10.1371/journal.pone.0274867 (PMC9560129; doi:10.1371/journal.pone.0274867)
Supplement: S7 Table — Analysis was performed on LDexpress module from the LDlink online tool of NCBI and this list was downloaded. (XLSX) [file pone.0274867.s008.xlsx]

## Sheet: S7 Table
Study SNP	SNP in LD	R2	D	Gene Symbol	Gencode ID	Tissue	Non-effect Allele Freq	Effect Allele Freq	Effect Size	P-value
rs11511253	rs10764162	0.616859	0.98546	SEPT7P9	ENSG00000120555.13	Testis	C=0.736	T=0.264	0.685277	7.64553e-51
rs11511253	rs12775895	0.607434	0.985401	SEPT7P9	ENSG00000120555.13	Testis	G=0.733	A=0.267	0.689798	3.16199e-49
rs11511253	rs7087510	0.891125	0.993301	SEPT7P9	ENSG00000120555.13	Testis	G=0.798	A=0.202	0.580452	1.29274e-30
rs11511253	rs138310998	0.891125	0.993301	SEPT7P9	ENSG00000120555.13	Testis	G=0.798	A=0.202	0.580452	1.29274e-30
rs11511253	rs4070543	0.891125	0.993301	SEPT7P9	ENSG00000120555.13	Testis	G=0.798	A=0.202	0.580452	1.29274e-30
rs11511253	rs12571329	0.891125	0.993301	SEPT7P9	ENSG00000120555.13	Testis	G=0.798	A=0.202	0.580452	1.29274e-30
rs11511253	rs61840410	0.891125	0.993301	SEPT7P9	ENSG00000120555.13	Testis	C=0.798	T=0.202	0.580452	1.29274e-30
rs11511253	rs7069025	0.891125	0.993301	SEPT7P9	ENSG00000120555.13	Testis	G=0.798	A=0.202	0.580452	1.29274e-30
rs11511253	rs12770432	0.891125	0.993301	SEPT7P9	ENSG00000120555.13	Testis	G=0.798	A=0.202	0.580452	1.29274e-30
rs11511253	rs11592779	0.872669	0.979927	SEPT7P9	ENSG00000120555.13	Testis	C=0.799	T=0.201	0.580452	1.29274e-30
rs11511253	rs4881586	0.86621	0.973269	SEPT7P9	ENSG00000120555.13	Testis	C=0.8	T=0.2	0.580452	1.29274e-30
rs11511253	rs7923903	0.879145	0.986601	SEPT7P9	ENSG00000120555.13	Testis	G=0.798	A=0.202	0.580452	1.29274e-30
rs11511253	rs7896006	0.879145	0.986601	SEPT7P9	ENSG00000120555.13	Testis	C=0.798	T=0.202	0.580452	1.29274e-30
rs11511253	rs7896545	0.879145	0.986601	SEPT7P9	ENSG00000120555.13	Testis	C=0.798	T=0.202	0.580452	1.29274e-30
rs11511253	rs7076099	0.879145	0.986601	SEPT7P9	ENSG00000120555.13	Testis	G=0.798	A=0.202	0.580452	1.29274e-30
rs11511253	rs11011558	0.993439	1	SEPT7P9	ENSG00000120555.13	Testis	G=0.815	A=0.185	0.612543	1.33815e-30
rs11511253	rs12570560	0.891125	0.993301	SEPT7P9	ENSG00000120555.13	Testis	C=0.798	G=0.202	0.57793	3.35933e-30
rs11511253	rs61837257	0.993439	1	SEPT7P9	ENSG00000120555.13	Testis	C=0.815	G=0.185	0.613944	8.81317e-30
rs11511253	rs35949805	0.896667	0.993309	SEPT7P9	ENSG00000120555.13	Testis	G=0.799	A=0.201	0.583447	2.18725e-29
rs11511253	rs3970136	0.891125	0.993301	SEPT7P9	ENSG00000120555.13	Testis	T=0.798	C=0.202	0.583447	2.18725e-29
rs11511253	rs11146675	0.891125	0.993301	SEPT7P9	ENSG00000120555.13	Testis	G=0.798	T=0.202	0.583447	2.18725e-29
rs11511253	rs12358135	0.879145	0.986601	SEPT7P9	ENSG00000120555.13	Testis	C=0.798	T=0.202	0.583447	2.18725e-29
rs11511253	rs111563184	0.891243	0.947169	SEPT7P9	ENSG00000120555.13	Testis	G=0.815	GC=0.185	0.595372	2.66546e-29
rs11511253	rs144280981	0.986906	0.993431	SEPT7P9	ENSG00000120555.13	Testis	C=0.814	T=0.186	0.605232	2.85597e-29
rs11511253	rs7093896	0.993439	1	SEPT7P9	ENSG00000120555.13	Testis	A=0.815	T=0.185	0.605232	2.85597e-29
rs11511253	rs3087759	0.993439	1	SEPT7P9	ENSG00000120555.13	Testis	A=0.815	C=0.185	0.605232	2.85597e-29
rs11511253	rs4934946	0.993439	1	SEPT7P9	ENSG00000120555.13	Testis	T=0.815	C=0.185	0.605232	2.85597e-29
rs11511253	rs11011555	0.993439	1	SEPT7P9	ENSG00000120555.13	Testis	T=0.815	C=0.185	0.605232	2.85597e-29
rs11511253	rs61837224	0.993439	1	SEPT7P9	ENSG00000120555.13	Testis	G=0.815	C=0.185	0.605232	2.85597e-29
rs11511253	rs117398853	0.993439	1	SEPT7P9	ENSG00000120555.13	Testis	C=0.815	G=0.185	0.605232	2.85597e-29
rs11511253	rs9663128	0.993439	1	SEPT7P9	ENSG00000120555.13	Testis	C=0.815	G=0.185	0.605232	2.85597e-29
rs11511253	rs7088208	0.986906	0.993431	SEPT7P9	ENSG00000120555.13	Testis	T=0.814	C=0.186	0.605232	2.85597e-29
rs11511253	rs117840800	0.993439	1	SEPT7P9	ENSG00000120555.13	Testis	A=0.815	G=0.185	0.605232	2.85597e-29
rs11511253	rs74890899	0.986895	1	SEPT7P9	ENSG00000120555.13	Testis	C=0.816	T=0.184	0.605232	2.85597e-29
rs11511253	rs1810634	0.993439	1	SEPT7P9	ENSG00000120555.13	Testis	A=0.815	G=0.185	0.605232	2.85597e-29
rs11511253	rs9664768	0.993439	1	SEPT7P9	ENSG00000120555.13	Testis	G=0.815	A=0.185	0.605232	2.85597e-29
rs11511253	rs72639568	0.993439	1	SEPT7P9	ENSG00000120555.13	Testis	G=0.815	A=0.185	0.605232	2.85597e-29
rs11511253	rs77114817	0.986895	1	SEPT7P9	ENSG00000120555.13	Testis	T=0.816	C=0.184	0.605232	2.85597e-29
rs11511253	rs11492515	0.993439	1	SEPT7P9	ENSG00000120555.13	Testis	C=0.815	T=0.185	0.605232	2.85597e-29
rs11511253	rs11492459	0.993439	1	SEPT7P9	ENSG00000120555.13	Testis	T=0.815	C=0.185	0.605232	2.85597e-29
rs11511253	rs200253039	0.993439	1	SEPT7P9	ENSG00000120555.13	Testis	C=0.815	T=0.185	0.605232	2.85597e-29
rs11511253	rs7084618	0.993439	1	SEPT7P9	ENSG00000120555.13	Testis	A=0.815	T=0.185	0.605232	2.85597e-29
rs11511253	rs7095113	0.993439	1	SEPT7P9	ENSG00000120555.13	Testis	G=0.815	A=0.185	0.605232	2.85597e-29
rs11511253	rs148773254	0.993439	1	SEPT7P9	ENSG00000120555.13	Testis	C=0.815	T=0.185	0.605232	2.85597e-29
rs11511253	rs4623823	0.993439	1	SEPT7P9	ENSG00000120555.13	Testis	C=0.815	T=0.185	0.605232	2.85597e-29
rs11511253	rs35712971	0.993439	1	SEPT7P9	ENSG00000120555.13	Testis	A=0.815	T=0.185	0.605232	2.85597e-29
rs11511253	rs11146894	0.986895	1	SEPT7P9	ENSG00000120555.13	Testis	G=0.816	A=0.184	0.605232	2.85597e-29
rs11511253	rs4572067	0.993439	1	SEPT7P9	ENSG00000120555.13	Testis	G=0.815	T=0.185	0.605232	2.85597e-29
rs11511253	rs11146911	1	1	SEPT7P9	ENSG00000120555.13	Testis	C=0.814	A=0.186	0.605232	2.85597e-29
rs11511253	rs11597330	0.974276	1	SEPT7P9	ENSG00000120555.13	Testis	C=0.81	T=0.19	0.601245	3.01712e-29
rs11511253	rs200474745	0.974046	0.993415	SEPT7P9	ENSG00000120555.13	Testis	CGAATGGAATG=0.812	C=0.188	0.607451	3.9079e-29
rs11511253	rs77578626	0.967718	0.993407	SEPT7P9	ENSG00000120555.13	Testis	A=0.811	G=0.189	0.587795	4.68999e-29
rs11511253	rs11011533	0.986895	1	SEPT7P9	ENSG00000120555.13	Testis	G=0.816	A=0.184	0.600641	8.58457e-29
rs11511253	rs10827860	0.986895	1	SEPT7P9	ENSG00000120555.13	Testis	G=0.816	A=0.184	0.600641	8.58457e-29
rs11511253	rs10827862	0.986895	1	SEPT7P9	ENSG00000120555.13	Testis	C=0.816	A=0.184	0.600641	8.58457e-29
rs11511253	rs7917312	0.986895	1	SEPT7P9	ENSG00000120555.13	Testis	C=0.816	T=0.184	0.600641	8.58457e-29
rs11511253	rs11011543	0.986895	1	SEPT7P9	ENSG00000120555.13	Testis	A=0.816	T=0.184	0.600641	8.58457e-29
rs11511253	rs10827866	0.986895	1	SEPT7P9	ENSG00000120555.13	Testis	G=0.816	T=0.184	0.600641	8.58457e-29
rs11511253	rs66610970	0.986895	1	SEPT7P9	ENSG00000120555.13	Testis	CT=0.816	C=0.184	0.600641	8.58457e-29
rs11511253	rs138284504	0.986895	1	SEPT7P9	ENSG00000120555.13	Testis	C=0.816	T=0.184	0.600641	8.58457e-29
rs11511253	rs10827867	0.986895	1	SEPT7P9	ENSG00000120555.13	Testis	T=0.816	C=0.184	0.600641	8.58457e-29
rs11511253	rs4881618	0.993466	1	SEPT7P9	ENSG00000120555.13	Testis	G=0.813	T=0.187	0.604519	9.46782e-29
rs11511253	rs1902549	0.967718	0.993407	SEPT7P9	ENSG00000120555.13	Testis	C=0.811	T=0.189	0.607578	1.03443e-28
rs11511253	rs34458842	0.967718	0.993407	SEPT7P9	ENSG00000120555.13	Testis	TG=0.811	T=0.189	0.606635	1.05366e-28
rs11511253	rs79613030	0.993439	1	SEPT7P9	ENSG00000120555.13	Testis	G=0.815	A=0.185	0.600782	1.07937e-28
rs11511253	rs61839484	0.993439	1	SEPT7P9	ENSG00000120555.13	Testis	G=0.815	A=0.185	0.600782	1.07937e-28
rs11511253	rs12775030	0.993439	1	SEPT7P9	ENSG00000120555.13	Testis	C=0.815	T=0.185	0.599786	1.90693e-28
rs11511253	rs367919155	0.993439	1	SEPT7P9	ENSG00000120555.13	Testis	G=0.815	C=0.185	0.599872	2.39577e-28
rs11511253	rs11595308	1	1	SEPT7P9	ENSG00000120555.13	Testis	C=0.814	A=0.186	0.599872	2.39577e-28
rs11511253	rs11146621	0.993466	1	SEPT7P9	ENSG00000120555.13	Testis	G=0.813	A=0.187	0.599872	2.39577e-28
rs11511253	rs3928516	0.993466	1	SEPT7P9	ENSG00000120555.13	Testis	G=0.813	T=0.187	0.599872	2.39577e-28
rs11511253	rs2310211	0.993466	1	SEPT7P9	ENSG00000120555.13	Testis	G=0.813	A=0.187	0.599872	2.39577e-28
rs11511253	rs11146654	0.967718	0.993407	SEPT7P9	ENSG00000120555.13	Testis	C=0.811	T=0.189	0.598403	3.40726e-28
rs11511253	rs9731107	0.967718	0.993407	SEPT7P9	ENSG00000120555.13	Testis	G=0.811	A=0.189	0.598403	3.40726e-28
rs11511253	rs7071794	0.967718	0.993407	SEPT7P9	ENSG00000120555.13	Testis	T=0.811	A=0.189	0.598403	3.40726e-28
rs11511253	rs11146702	0.967718	0.993407	SEPT7P9	ENSG00000120555.13	Testis	G=0.811	A=0.189	0.598403	3.40726e-28
rs11511253	rs11146709	0.967718	0.993407	SEPT7P9	ENSG00000120555.13	Testis	C=0.811	T=0.189	0.598403	3.40726e-28
rs11511253	rs11146713	0.967718	0.993407	SEPT7P9	ENSG00000120555.13	Testis	G=0.811	T=0.189	0.598403	3.40726e-28
rs11511253	rs7068733	0.948142	0.973726	SEPT7P9	ENSG00000120555.13	Testis	C=0.814	G=0.186	0.598403	3.40726e-28
rs11511253	rs11597575	0.967718	0.993407	SEPT7P9	ENSG00000120555.13	Testis	G=0.811	C=0.189	0.598403	3.40726e-28
rs11511253	rs10870406	0.967718	0.993407	SEPT7P9	ENSG00000120555.13	Testis	G=0.811	A=0.189	0.598403	3.40726e-28
rs11511253	rs4881578	0.967718	0.993407	SEPT7P9	ENSG00000120555.13	Testis	G=0.811	A=0.189	0.598403	3.40726e-28
rs11511253	rs4881584	0.967718	0.993407	SEPT7P9	ENSG00000120555.13	Testis	C=0.811	T=0.189	0.598403	3.40726e-28
rs11511253	rs7099107	0.967718	0.993407	SEPT7P9	ENSG00000120555.13	Testis	G=0.811	A=0.189	0.598403	3.40726e-28
rs11511253	rs11146753	0.967718	0.993407	SEPT7P9	ENSG00000120555.13	Testis	A=0.811	G=0.189	0.598403	3.40726e-28
rs11511253	rs10870421	0.967718	0.993407	SEPT7P9	ENSG00000120555.13	Testis	C=0.811	A=0.189	0.598403	3.40726e-28
rs11511253	rs12773561	0.967718	0.993407	SEPT7P9	ENSG00000120555.13	Testis	G=0.811	C=0.189	0.598403	3.40726e-28
rs11511253	rs11146784	0.961456	0.993399	SEPT7P9	ENSG00000120555.13	Testis	C=0.81	T=0.19	0.598403	3.40726e-28
rs11511253	rs12357698	0.967718	0.993407	SEPT7P9	ENSG00000120555.13	Testis	T=0.811	A=0.189	0.598403	3.40726e-28
rs11511253	rs4556804	0.967718	0.993407	SEPT7P9	ENSG00000120555.13	Testis	G=0.811	A=0.189	0.598403	3.40726e-28
rs11511253	rs12775411	0.95526	0.993391	SEPT7P9	ENSG00000120555.13	Testis	G=0.809	A=0.191	0.590364	5.39422e-28
rs11511253	rs200220357	0.993439	1	SEPT7P9	ENSG00000120555.13	Testis	C=0.815	T=0.185	0.60123	5.92464e-28
rs11511253	rs7095128	0.993439	1	SEPT7P9	ENSG00000120555.13	Testis	G=0.815	C=0.185	0.60123	5.92464e-28
rs11511253	rs11146869	0.993439	1	SEPT7P9	ENSG00000120555.13	Testis	A=0.815	G=0.185	0.60123	5.92464e-28
rs11511253	rs61839284	0.993439	1	SEPT7P9	ENSG00000120555.13	Testis	A=0.815	C=0.185	0.60123	5.92464e-28
rs11511253	rs34019437	0.993439	1	SEPT7P9	ENSG00000120555.13	Testis	C=0.815	T=0.185	0.60123	5.92464e-28
rs11511253	rs4326715	0.993466	1	SEPT7P9	ENSG00000120555.13	Testis	A=0.813	G=0.187	0.60123	5.92464e-28
rs11511253	rs2310210	0.980362	0.993396	SEPT7P9	ENSG00000120555.13	Testis	G=0.815	A=0.185	0.60123	5.92464e-28
rs11511253	rs11146699	0.967718	0.993407	SEPT7P9	ENSG00000120555.13	Testis	G=0.811	A=0.189	0.599908	8.23237e-28
rs11511253	rs7074243	0.961456	0.993399	SEPT7P9	ENSG00000120555.13	Testis	A=0.81	T=0.19	0.590326	9.81917e-28
rs11511253	rs11817950	0.954916	0.986815	SEPT7P9	ENSG00000120555.13	Testis	C=0.811	T=0.189	0.590326	9.81917e-28
rs11511253	rs11146768	0.967718	0.993407	SEPT7P9	ENSG00000120555.13	Testis	C=0.811	T=0.189	0.590326	9.81917e-28
rs11511253	rs74798172	0.879145	0.986601	SEPT7P9	ENSG00000120555.13	Testis	C=0.798	G=0.202	0.571293	1.20201e-27
rs11511253	rs12772118	0.961177	0.986831	SEPT7P9	ENSG00000120555.13	Testis	T=0.812	G=0.188	0.593759	1.26371e-27
rs11511253	rs11146655	0.961177	0.986831	SEPT7P9	ENSG00000120555.13	Testis	A=0.812	G=0.188	0.593759	1.26371e-27
rs11511253	rs9664979	0.961177	0.986831	SEPT7P9	ENSG00000120555.13	Testis	G=0.812	A=0.188	0.593759	1.26371e-27
rs11511253	rs10870418	0.961177	0.986831	SEPT7P9	ENSG00000120555.13	Testis	C=0.812	T=0.188	0.593759	1.26371e-27
rs11511253	rs7910228	0.961177	0.986831	SEPT7P9	ENSG00000120555.13	Testis	A=0.812	T=0.188	0.593759	1.26371e-27
rs11511253	rs4881585	0.961177	0.986831	SEPT7P9	ENSG00000120555.13	Testis	A=0.812	G=0.188	0.593759	1.26371e-27
rs11511253	rs61839915	0.980362	0.993396	SEPT7P9	ENSG00000120555.13	Testis	C=0.815	T=0.185	0.597037	1.61782e-27
rs11511253	rs7089593	0.980362	0.993396	SEPT7P9	ENSG00000120555.13	Testis	A=0.815	G=0.185	0.597037	1.61782e-27
rs11511253	rs7089975	0.980362	0.993396	SEPT7P9	ENSG00000120555.13	Testis	A=0.815	G=0.185	0.597037	1.61782e-27
rs11511253	rs2180800	0.980362	0.993396	SEPT7P9	ENSG00000120555.13	Testis	C=0.815	T=0.185	0.597037	1.61782e-27
rs11511253	rs11596501	0.986895	1	SEPT7P9	ENSG00000120555.13	Testis	G=0.816	A=0.184	0.597037	1.61782e-27
rs11511253	rs11011546	0.986895	1	SEPT7P9	ENSG00000120555.13	Testis	G=0.816	A=0.184	0.597037	1.61782e-27
rs11511253	rs4088497	0.993466	1	SEPT7P9	ENSG00000120555.13	Testis	T=0.813	C=0.187	0.605925	1.80494e-27
rs11511253	rs11812823	0.986895	1	SEPT7P9	ENSG00000120555.13	Testis	T=0.816	C=0.184	0.596588	2.17731e-27
rs11511253	rs112309001	0.986895	1	SEPT7P9	ENSG00000120555.13	Testis	AG=0.816	A=0.184	0.596588	2.17731e-27
rs11511253	rs2012084	0.973898	0.986863	SEPT7P9	ENSG00000120555.13	Testis	T=0.814	C=0.186	0.596588	2.17731e-27
rs11511253	rs35747454	0.986895	1	SEPT7P9	ENSG00000120555.13	Testis	G=0.816	T=0.184	0.596588	2.17731e-27
rs11511253	rs12354584	0.986895	1	SEPT7P9	ENSG00000120555.13	Testis	G=0.816	T=0.184	0.596588	2.17731e-27
rs11511253	rs11511148	0.986895	1	SEPT7P9	ENSG00000120555.13	Testis	C=0.816	T=0.184	0.596588	2.17731e-27
rs11511253	rs11011567	0.986895	1	SEPT7P9	ENSG00000120555.13	Testis	A=0.816	G=0.184	0.596588	2.17731e-27
rs11511253	rs28413086	0.986895	1	SEPT7P9	ENSG00000120555.13	Testis	T=0.816	G=0.184	0.596588	2.17731e-27
rs11511253	rs35451472	0.986895	1	SEPT7P9	ENSG00000120555.13	Testis	C=0.816	T=0.184	0.596588	2.17731e-27
rs11511253	rs7070930	0.986895	1	SEPT7P9	ENSG00000120555.13	Testis	G=0.816	C=0.184	0.596588	2.17731e-27
rs11511253	rs80081575	0.986895	1	SEPT7P9	ENSG00000120555.13	Testis	G=0.816	A=0.184	0.596588	2.17731e-27
rs11511253	rs7076118	0.986895	1	SEPT7P9	ENSG00000120555.13	Testis	C=0.816	A=0.184	0.596588	2.17731e-27
rs11511253	rs34873071	0.986895	1	SEPT7P9	ENSG00000120555.13	Testis	G=0.816	T=0.184	0.596588	2.17731e-27
rs11511253	rs58673518	0.986895	1	SEPT7P9	ENSG00000120555.13	Testis	G=0.816	T=0.184	0.596588	2.17731e-27
rs11511253	rs2085430	0.993439	1	SEPT7P9	ENSG00000120555.13	Testis	C=0.815	G=0.185	0.596588	2.17731e-27
rs11511253	rs10870459	0.986895	1	SEPT7P9	ENSG00000120555.13	Testis	A=0.816	G=0.184	0.596588	2.17731e-27
rs11511253	rs11146613	0.993439	1	SEPT7P9	ENSG00000120555.13	Testis	C=0.815	T=0.185	0.596588	2.17731e-27
rs11511253	rs182246855	0.973833	0.99336	SEPT7P9	ENSG00000120555.13	Testis	G=0.816	A=0.184	0.596588	2.17731e-27
rs11511253	rs12359136	0.986906	0.993431	SEPT7P9	ENSG00000120555.13	Testis	A=0.814	T=0.186	0.596588	2.17731e-27
rs11511253	rs11146640	0.993439	1	SEPT7P9	ENSG00000120555.13	Testis	G=0.815	A=0.185	0.596588	2.17731e-27
rs11511253	rs11511253	1	1	SEPT7P9	ENSG00000120555.13	Testis	G=0.814	A=0.186	0.596497	2.44905e-27
rs11511253	rs2310280	0.986895	1	SEPT7P9	ENSG00000120555.13	Testis	A=0.816	G=0.184	0.59664	2.51063e-27
rs11511253	rs11146877	0.986895	1	SEPT7P9	ENSG00000120555.13	Testis	C=0.816	T=0.184	0.59664	2.51063e-27
rs11511253	rs149200693	0.961177	0.986831	SEPT7P9	ENSG00000120555.13	Testis	G=0.812	C=0.188	0.595441	2.94273e-27
rs11511253	rs372035840	0.961177	0.986831	SEPT7P9	ENSG00000120555.13	Testis	AC=0.812	A=0.188	0.595441	2.94273e-27
rs11511253	rs10870371	0.961177	0.986831	SEPT7P9	ENSG00000120555.13	Testis	G=0.812	A=0.188	0.595441	2.94273e-27
rs11511253	rs35361303	0.961177	0.986831	SEPT7P9	ENSG00000120555.13	Testis	C=0.812	G=0.188	0.585771	3.53068e-27
rs11511253	rs35173665	0.948722	0.986798	SEPT7P9	ENSG00000120555.13	Testis	T=0.81	G=0.19	0.585771	3.53068e-27
rs11511253	rs7068771	0.961177	0.986831	SEPT7P9	ENSG00000120555.13	Testis	T=0.812	G=0.188	0.585771	3.53068e-27
rs11511253	rs12571507	0.936072	0.980198	SEPT7P9	ENSG00000120555.13	Testis	C=0.81	T=0.19	0.581308	4.28391e-27
rs11511253	rs11011542	0.980366	1	SEPT7P9	ENSG00000120555.13	Testis	C=0.817	T=0.183	0.594474	4.82528e-27
rs11511253	rs7068365	0.967718	0.993407	SEPT7P9	ENSG00000120555.13	Testis	C=0.811	T=0.189	0.58636	4.97902e-27
rs11511253	rs11011501	0.967321	0.993324	SEPT7P9	ENSG00000120555.13	Testis	G=0.817	A=0.183	0.592451	5.79842e-27
rs11511253	rs11011509	0.973833	0.99336	SEPT7P9	ENSG00000120555.13	Testis	G=0.816	A=0.184	0.592451	5.79842e-27
rs11511253	rs7100199	0.96737	0.986792	SEPT7P9	ENSG00000120555.13	Testis	T=0.815	C=0.185	0.592451	5.79842e-27
rs11511253	rs10764157	0.980366	1	SEPT7P9	ENSG00000120555.13	Testis	A=0.817	G=0.183	0.592451	5.79842e-27
rs11511253	rs2021018	0.980366	1	SEPT7P9	ENSG00000120555.13	Testis	G=0.817	A=0.183	0.592451	5.79842e-27
rs11511253	rs7071245	0.980366	1	SEPT7P9	ENSG00000120555.13	Testis	G=0.817	A=0.183	0.592451	5.79842e-27
rs11511253	rs10827863	0.980366	1	SEPT7P9	ENSG00000120555.13	Testis	T=0.817	C=0.183	0.592451	5.79842e-27
rs11511253	rs36072007	0.961177	0.986831	SEPT7P9	ENSG00000120555.13	Testis	T=0.812	TA=0.188	0.587477	8.03298e-27
rs11511253	rs10870432	0.954916	0.986815	SEPT7P9	ENSG00000120555.13	Testis	G=0.811	A=0.189	0.587477	8.03298e-27
rs11511253	rs71500469	0.967718	0.993407	SEPT7P9	ENSG00000120555.13	Testis	T=0.811	G=0.189	0.599449	1.27237e-26
rs11511253	rs7081059	0.961177	0.986831	SEPT7P9	ENSG00000120555.13	Testis	C=0.812	A=0.188	0.581864	1.72789e-26
rs11511253	rs2180899	0.728744	1	SEPT7P9	ENSG00000120555.13	Testis	G=0.761	A=0.239	0.522261	2.13011e-26
rs11511253	rs10870362	0.993466	1	SEPT7P9	ENSG00000120555.13	Testis	G=0.813	A=0.187	0.593682	2.80649e-26
rs11511253	rs71500456	0.967718	0.993407	SEPT7P9	ENSG00000120555.13	Testis	C=0.811	T=0.189	0.606757	4.3502e-26
rs11511253	rs9794215	0.967718	0.993407	SEPT7P9	ENSG00000120555.13	Testis	C=0.811	T=0.189	0.580035	6.99189e-26
rs11511253	rs7089032	0.967718	0.993407	SEPT7P9	ENSG00000120555.13	Testis	G=0.811	T=0.189	0.584068	9.77724e-26
rs11511253	rs11011558	0.993439	1	RP11-291L22.9	ENSG00000276805.2	Skin - Sun Exposed (Lower leg)	G=0.815	A=0.185	0.577341	1.49393e-25
rs11511253	rs2180899	0.728744	1	RP11-291L22.9	ENSG00000276805.2	Skin - Sun Exposed (Lower leg)	G=0.761	A=0.239	0.524183	1.07432e-24
rs11511253	rs11592779	0.872669	0.979927	RP11-291L22.9	ENSG00000276805.2	Skin - Sun Exposed (Lower leg)	C=0.799	T=0.201	0.540821	1.26966e-24
rs11511253	rs7923903	0.879145	0.986601	RP11-291L22.9	ENSG00000276805.2	Skin - Sun Exposed (Lower leg)	G=0.798	A=0.202	0.540821	1.26966e-24
rs11511253	rs7896006	0.879145	0.986601	RP11-291L22.9	ENSG00000276805.2	Skin - Sun Exposed (Lower leg)	C=0.798	T=0.202	0.540821	1.26966e-24
rs11511253	rs7896545	0.879145	0.986601	RP11-291L22.9	ENSG00000276805.2	Skin - Sun Exposed (Lower leg)	C=0.798	T=0.202	0.540821	1.26966e-24
rs11511253	rs7076099	0.879145	0.986601	RP11-291L22.9	ENSG00000276805.2	Skin - Sun Exposed (Lower leg)	G=0.798	A=0.202	0.540821	1.26966e-24
rs11511253	rs200253039	0.993439	1	RP11-291L22.9	ENSG00000276805.2	Skin - Sun Exposed (Lower leg)	C=0.815	T=0.185	0.571238	1.40608e-24
rs11511253	rs11011543	0.986895	1	RP11-291L22.9	ENSG00000276805.2	Skin - Sun Exposed (Lower leg)	A=0.816	T=0.184	0.569996	1.87031e-24
rs11511253	rs10827866	0.986895	1	RP11-291L22.9	ENSG00000276805.2	Skin - Sun Exposed (Lower leg)	G=0.816	T=0.184	0.569996	1.87031e-24
rs11511253	rs66610970	0.986895	1	RP11-291L22.9	ENSG00000276805.2	Skin - Sun Exposed (Lower leg)	CT=0.816	C=0.184	0.569996	1.87031e-24
rs11511253	rs138284504	0.986895	1	RP11-291L22.9	ENSG00000276805.2	Skin - Sun Exposed (Lower leg)	C=0.816	T=0.184	0.569996	1.87031e-24
rs11511253	rs10827867	0.986895	1	RP11-291L22.9	ENSG00000276805.2	Skin - Sun Exposed (Lower leg)	T=0.816	C=0.184	0.569996	1.87031e-24
rs11511253	rs4881586	0.86621	0.973269	RP11-291L22.9	ENSG00000276805.2	Skin - Sun Exposed (Lower leg)	C=0.8	T=0.2	0.540018	1.90521e-24
rs11511253	rs4088497	0.993466	1	RP11-291L22.9	ENSG00000276805.2	Skin - Sun Exposed (Lower leg)	T=0.813	C=0.187	0.573744	2.78662e-24
rs11511253	rs61840410	0.891125	0.993301	RP11-291L22.9	ENSG00000276805.2	Skin - Sun Exposed (Lower leg)	C=0.798	T=0.202	0.538675	3.60554e-24
rs11511253	rs11146775	0.967718	0.993407	SEPT7P9	ENSG00000120555.13	Testis	C=0.811	T=0.189	0.573365	3.67406e-24
rs11511253	rs4070543	0.891125	0.993301	RP11-291L22.9	ENSG00000276805.2	Skin - Sun Exposed (Lower leg)	G=0.798	A=0.202	0.534142	3.69956e-24
rs11511253	rs367919155	0.993439	1	RP11-291L22.9	ENSG00000276805.2	Skin - Sun Exposed (Lower leg)	G=0.815	C=0.185	0.566693	3.78493e-24
rs11511253	rs11511253	1	1	RP11-291L22.9	ENSG00000276805.2	Skin - Sun Exposed (Lower leg)	G=0.814	A=0.186	0.566693	3.78493e-24
rs11511253	rs11595308	1	1	RP11-291L22.9	ENSG00000276805.2	Skin - Sun Exposed (Lower leg)	C=0.814	A=0.186	0.566693	3.78493e-24
rs11511253	rs11146621	0.993466	1	RP11-291L22.9	ENSG00000276805.2	Skin - Sun Exposed (Lower leg)	G=0.813	A=0.187	0.566693	3.78493e-24
rs11511253	rs2310211	0.993466	1	RP11-291L22.9	ENSG00000276805.2	Skin - Sun Exposed (Lower leg)	G=0.813	A=0.187	0.566693	3.78493e-24
rs11511253	rs144280981	0.986906	0.993431	RP11-291L22.9	ENSG00000276805.2	Skin - Sun Exposed (Lower leg)	C=0.814	T=0.186	0.565838	3.82791e-24
rs11511253	rs7093896	0.993439	1	RP11-291L22.9	ENSG00000276805.2	Skin - Sun Exposed (Lower leg)	A=0.815	T=0.185	0.565838	3.82791e-24
rs11511253	rs3087759	0.993439	1	RP11-291L22.9	ENSG00000276805.2	Skin - Sun Exposed (Lower leg)	A=0.815	C=0.185	0.565838	3.82791e-24
rs11511253	rs4934946	0.993439	1	RP11-291L22.9	ENSG00000276805.2	Skin - Sun Exposed (Lower leg)	T=0.815	C=0.185	0.565838	3.82791e-24
rs11511253	rs11011555	0.993439	1	RP11-291L22.9	ENSG00000276805.2	Skin - Sun Exposed (Lower leg)	T=0.815	C=0.185	0.565838	3.82791e-24
rs11511253	rs61837224	0.993439	1	RP11-291L22.9	ENSG00000276805.2	Skin - Sun Exposed (Lower leg)	G=0.815	C=0.185	0.565838	3.82791e-24
rs11511253	rs117398853	0.993439	1	RP11-291L22.9	ENSG00000276805.2	Skin - Sun Exposed (Lower leg)	C=0.815	G=0.185	0.565838	3.82791e-24
rs11511253	rs9663128	0.993439	1	RP11-291L22.9	ENSG00000276805.2	Skin - Sun Exposed (Lower leg)	C=0.815	G=0.185	0.565838	3.82791e-24
rs11511253	rs7088208	0.986906	0.993431	RP11-291L22.9	ENSG00000276805.2	Skin - Sun Exposed (Lower leg)	T=0.814	C=0.186	0.565838	3.82791e-24
rs11511253	rs117840800	0.993439	1	RP11-291L22.9	ENSG00000276805.2	Skin - Sun Exposed (Lower leg)	A=0.815	G=0.185	0.565838	3.82791e-24
rs11511253	rs74890899	0.986895	1	RP11-291L22.9	ENSG00000276805.2	Skin - Sun Exposed (Lower leg)	C=0.816	T=0.184	0.565838	3.82791e-24
rs11511253	rs1810634	0.993439	1	RP11-291L22.9	ENSG00000276805.2	Skin - Sun Exposed (Lower leg)	A=0.815	G=0.185	0.565838	3.82791e-24
rs11511253	rs9664768	0.993439	1	RP11-291L22.9	ENSG00000276805.2	Skin - Sun Exposed (Lower leg)	G=0.815	A=0.185	0.565838	3.82791e-24
rs11511253	rs72639568	0.993439	1	RP11-291L22.9	ENSG00000276805.2	Skin - Sun Exposed (Lower leg)	G=0.815	A=0.185	0.565838	3.82791e-24
rs11511253	rs77114817	0.986895	1	RP11-291L22.9	ENSG00000276805.2	Skin - Sun Exposed (Lower leg)	T=0.816	C=0.184	0.565838	3.82791e-24
rs11511253	rs11492515	0.993439	1	RP11-291L22.9	ENSG00000276805.2	Skin - Sun Exposed (Lower leg)	C=0.815	T=0.185	0.565838	3.82791e-24
rs11511253	rs11492459	0.993439	1	RP11-291L22.9	ENSG00000276805.2	Skin - Sun Exposed (Lower leg)	T=0.815	C=0.185	0.565838	3.82791e-24
rs11511253	rs7084618	0.993439	1	RP11-291L22.9	ENSG00000276805.2	Skin - Sun Exposed (Lower leg)	A=0.815	T=0.185	0.565838	3.82791e-24
rs11511253	rs7095113	0.993439	1	RP11-291L22.9	ENSG00000276805.2	Skin - Sun Exposed (Lower leg)	G=0.815	A=0.185	0.565838	3.82791e-24
rs11511253	rs148773254	0.993439	1	RP11-291L22.9	ENSG00000276805.2	Skin - Sun Exposed (Lower leg)	C=0.815	T=0.185	0.565838	3.82791e-24
rs11511253	rs4623823	0.993439	1	RP11-291L22.9	ENSG00000276805.2	Skin - Sun Exposed (Lower leg)	C=0.815	T=0.185	0.565838	3.82791e-24
rs11511253	rs11146894	0.986895	1	RP11-291L22.9	ENSG00000276805.2	Skin - Sun Exposed (Lower leg)	G=0.816	A=0.184	0.565838	3.82791e-24
rs11511253	rs4572067	0.993439	1	RP11-291L22.9	ENSG00000276805.2	Skin - Sun Exposed (Lower leg)	G=0.815	T=0.185	0.565838	3.82791e-24
rs11511253	rs11146911	1	1	RP11-291L22.9	ENSG00000276805.2	Skin - Sun Exposed (Lower leg)	C=0.814	A=0.186	0.565838	3.82791e-24
rs11511253	rs7087510	0.891125	0.993301	RP11-291L22.9	ENSG00000276805.2	Skin - Sun Exposed (Lower leg)	G=0.798	A=0.202	0.536008	3.84251e-24
rs11511253	rs138310998	0.891125	0.993301	RP11-291L22.9	ENSG00000276805.2	Skin - Sun Exposed (Lower leg)	G=0.798	A=0.202	0.536008	3.84251e-24
rs11511253	rs12571329	0.891125	0.993301	RP11-291L22.9	ENSG00000276805.2	Skin - Sun Exposed (Lower leg)	G=0.798	A=0.202	0.536008	3.84251e-24
rs11511253	rs7069025	0.891125	0.993301	RP11-291L22.9	ENSG00000276805.2	Skin - Sun Exposed (Lower leg)	G=0.798	A=0.202	0.536008	3.84251e-24
rs11511253	rs12770432	0.891125	0.993301	RP11-291L22.9	ENSG00000276805.2	Skin - Sun Exposed (Lower leg)	G=0.798	A=0.202	0.536008	3.84251e-24
rs11511253	rs12570560	0.891125	0.993301	RP11-291L22.9	ENSG00000276805.2	Skin - Sun Exposed (Lower leg)	C=0.798	G=0.202	0.535954	4.15394e-24
rs11511253	rs35712971	0.993439	1	RP11-291L22.9	ENSG00000276805.2	Skin - Sun Exposed (Lower leg)	A=0.815	T=0.185	0.566174	4.2498e-24
rs11511253	rs61837257	0.993439	1	RP11-291L22.9	ENSG00000276805.2	Skin - Sun Exposed (Lower leg)	C=0.815	G=0.185	0.568849	4.45642e-24
rs11511253	rs3928516	0.993466	1	RP11-291L22.9	ENSG00000276805.2	Skin - Sun Exposed (Lower leg)	G=0.813	T=0.187	0.56166	4.98192e-24
rs11511253	rs12775030	0.993439	1	RP11-291L22.9	ENSG00000276805.2	Skin - Sun Exposed (Lower leg)	C=0.815	T=0.185	0.56233	8.22906e-24
rs11511253	rs11011533	0.986895	1	RP11-291L22.9	ENSG00000276805.2	Skin - Sun Exposed (Lower leg)	G=0.816	A=0.184	0.56326	8.50514e-24
rs11511253	rs10827860	0.986895	1	RP11-291L22.9	ENSG00000276805.2	Skin - Sun Exposed (Lower leg)	G=0.816	A=0.184	0.56326	8.50514e-24
rs11511253	rs10827862	0.986895	1	RP11-291L22.9	ENSG00000276805.2	Skin - Sun Exposed (Lower leg)	C=0.816	A=0.184	0.56326	8.50514e-24
rs11511253	rs7917312	0.986895	1	RP11-291L22.9	ENSG00000276805.2	Skin - Sun Exposed (Lower leg)	C=0.816	T=0.184	0.56326	8.50514e-24
rs11511253	rs7074243	0.961456	0.993399	RP11-291L22.9	ENSG00000276805.2	Skin - Sun Exposed (Lower leg)	A=0.81	T=0.19	0.559964	1.08196e-23
rs11511253	rs11146768	0.967718	0.993407	RP11-291L22.9	ENSG00000276805.2	Skin - Sun Exposed (Lower leg)	C=0.811	T=0.189	0.559964	1.08196e-23
rs11511253	rs11146713	0.967718	0.993407	RP11-291L22.9	ENSG00000276805.2	Skin - Sun Exposed (Lower leg)	G=0.811	T=0.189	0.56074	1.19436e-23
rs11511253	rs7099107	0.967718	0.993407	RP11-291L22.9	ENSG00000276805.2	Skin - Sun Exposed (Lower leg)	G=0.811	A=0.189	0.559278	1.22885e-23
rs11511253	rs11011558	0.993439	1	RP11-291L22.9	ENSG00000276805.2	Nerve - Tibial	G=0.815	A=0.185	0.581286	1.22931e-23
rs11511253	rs79613030	0.993439	1	RP11-291L22.9	ENSG00000276805.2	Skin - Sun Exposed (Lower leg)	G=0.815	A=0.185	0.558769	1.77291e-23
rs11511253	rs61839484	0.993439	1	RP11-291L22.9	ENSG00000276805.2	Skin - Sun Exposed (Lower leg)	G=0.815	A=0.185	0.558769	1.77291e-23
rs11511253	rs11146654	0.967718	0.993407	RP11-291L22.9	ENSG00000276805.2	Skin - Sun Exposed (Lower leg)	C=0.811	T=0.189	0.558257	2.04956e-23
rs11511253	rs9731107	0.967718	0.993407	RP11-291L22.9	ENSG00000276805.2	Skin - Sun Exposed (Lower leg)	G=0.811	A=0.189	0.558257	2.04956e-23
rs11511253	rs7071794	0.967718	0.993407	RP11-291L22.9	ENSG00000276805.2	Skin - Sun Exposed (Lower leg)	T=0.811	A=0.189	0.558257	2.04956e-23
rs11511253	rs11146702	0.967718	0.993407	RP11-291L22.9	ENSG00000276805.2	Skin - Sun Exposed (Lower leg)	G=0.811	A=0.189	0.558257	2.04956e-23
rs11511253	rs11146709	0.967718	0.993407	RP11-291L22.9	ENSG00000276805.2	Skin - Sun Exposed (Lower leg)	C=0.811	T=0.189	0.558257	2.04956e-23
rs11511253	rs7068733	0.948142	0.973726	RP11-291L22.9	ENSG00000276805.2	Skin - Sun Exposed (Lower leg)	C=0.814	G=0.186	0.558257	2.04956e-23
rs11511253	rs11597575	0.967718	0.993407	RP11-291L22.9	ENSG00000276805.2	Skin - Sun Exposed (Lower leg)	G=0.811	C=0.189	0.558257	2.04956e-23
rs11511253	rs10870406	0.967718	0.993407	RP11-291L22.9	ENSG00000276805.2	Skin - Sun Exposed (Lower leg)	G=0.811	A=0.189	0.558257	2.04956e-23
rs11511253	rs4881578	0.967718	0.993407	RP11-291L22.9	ENSG00000276805.2	Skin - Sun Exposed (Lower leg)	G=0.811	A=0.189	0.558257	2.04956e-23
rs11511253	rs4881584	0.967718	0.993407	RP11-291L22.9	ENSG00000276805.2	Skin - Sun Exposed (Lower leg)	C=0.811	T=0.189	0.558257	2.04956e-23
rs11511253	rs11146753	0.967718	0.993407	RP11-291L22.9	ENSG00000276805.2	Skin - Sun Exposed (Lower leg)	A=0.811	G=0.189	0.558257	2.04956e-23
rs11511253	rs10870421	0.967718	0.993407	RP11-291L22.9	ENSG00000276805.2	Skin - Sun Exposed (Lower leg)	C=0.811	A=0.189	0.558257	2.04956e-23
rs11511253	rs11146784	0.961456	0.993399	RP11-291L22.9	ENSG00000276805.2	Skin - Sun Exposed (Lower leg)	C=0.81	T=0.19	0.558257	2.04956e-23
rs11511253	rs12357698	0.967718	0.993407	RP11-291L22.9	ENSG00000276805.2	Skin - Sun Exposed (Lower leg)	T=0.811	A=0.189	0.558257	2.04956e-23
rs11511253	rs4556804	0.967718	0.993407	RP11-291L22.9	ENSG00000276805.2	Skin - Sun Exposed (Lower leg)	G=0.811	A=0.189	0.558257	2.04956e-23
rs11511253	rs10870362	0.993466	1	RP11-291L22.9	ENSG00000276805.2	Skin - Sun Exposed (Lower leg)	G=0.813	A=0.187	0.56683	2.10539e-23
rs11511253	rs12773561	0.967718	0.993407	RP11-291L22.9	ENSG00000276805.2	Skin - Sun Exposed (Lower leg)	G=0.811	C=0.189	0.554863	2.25521e-23
rs11511253	rs7068365	0.967718	0.993407	RP11-291L22.9	ENSG00000276805.2	Skin - Sun Exposed (Lower leg)	C=0.811	T=0.189	0.556585	2.27399e-23
rs11511253	rs1902549	0.967718	0.993407	RP11-291L22.9	ENSG00000276805.2	Skin - Sun Exposed (Lower leg)	C=0.811	T=0.189	0.561709	2.28046e-23
rs11511253	rs71500469	0.967718	0.993407	RP11-291L22.9	ENSG00000276805.2	Skin - Sun Exposed (Lower leg)	T=0.811	G=0.189	0.572841	2.53132e-23
rs11511253	rs12775411	0.95526	0.993391	RP11-291L22.9	ENSG00000276805.2	Skin - Sun Exposed (Lower leg)	G=0.809	A=0.191	0.554208	2.69098e-23
rs11511253	rs11011558	0.993439	1	RP11-291L22.9	ENSG00000276805.2	Skin - Not Sun Exposed (Suprapubic)	G=0.815	A=0.185	0.582365	3.45688e-23
rs11511253	rs200220357	0.993439	1	RP11-291L22.9	ENSG00000276805.2	Skin - Sun Exposed (Lower leg)	C=0.815	T=0.185	0.560029	3.45909e-23
rs11511253	rs12571507	0.936072	0.980198	RP11-291L22.9	ENSG00000276805.2	Skin - Sun Exposed (Lower leg)	C=0.81	T=0.19	0.55449	3.60831e-23
rs11511253	rs11011546	0.986895	1	RP11-291L22.9	ENSG00000276805.2	Skin - Sun Exposed (Lower leg)	G=0.816	A=0.184	0.559439	4.27224e-23
rs11511253	rs200253039	0.993439	1	RP11-291L22.9	ENSG00000276805.2	Nerve - Tibial	C=0.815	T=0.185	0.57961	5.05371e-23
rs11511253	rs111563184	0.891243	0.947169	RP11-291L22.9	ENSG00000276805.2	Skin - Sun Exposed (Lower leg)	G=0.815	GC=0.185	0.548359	5.86611e-23
rs11511253	rs11817950	0.954916	0.986815	RP11-291L22.9	ENSG00000276805.2	Skin - Sun Exposed (Lower leg)	C=0.811	T=0.189	0.548135	6.22685e-23
rs11511253	rs35361303	0.961177	0.986831	RP11-291L22.9	ENSG00000276805.2	Skin - Sun Exposed (Lower leg)	C=0.812	G=0.188	0.553802	7.53162e-23
rs11511253	rs35173665	0.948722	0.986798	RP11-291L22.9	ENSG00000276805.2	Skin - Sun Exposed (Lower leg)	T=0.81	G=0.19	0.553802	7.53162e-23
rs11511253	rs7068771	0.961177	0.986831	RP11-291L22.9	ENSG00000276805.2	Skin - Sun Exposed (Lower leg)	T=0.812	G=0.188	0.553802	7.53162e-23
rs11511253	rs11511253	1	1	RP11-291L22.9	ENSG00000276805.2	Nerve - Tibial	G=0.814	A=0.186	0.576016	8.74895e-23
rs11511253	rs11595308	1	1	RP11-291L22.9	ENSG00000276805.2	Nerve - Tibial	C=0.814	A=0.186	0.576016	8.74895e-23
rs11511253	rs11146621	0.993466	1	RP11-291L22.9	ENSG00000276805.2	Nerve - Tibial	G=0.813	A=0.187	0.576016	8.74895e-23
rs11511253	rs2310211	0.993466	1	RP11-291L22.9	ENSG00000276805.2	Nerve - Tibial	G=0.813	A=0.187	0.576016	8.74895e-23
rs11511253	rs7095128	0.993439	1	RP11-291L22.9	ENSG00000276805.2	Skin - Sun Exposed (Lower leg)	G=0.815	C=0.185	0.55461	9.06648e-23
rs11511253	rs3928516	0.993466	1	RP11-291L22.9	ENSG00000276805.2	Nerve - Tibial	G=0.813	T=0.187	0.571382	9.45034e-23
rs11511253	rs12358135	0.879145	0.986601	RP11-291L22.9	ENSG00000276805.2	Skin - Sun Exposed (Lower leg)	C=0.798	T=0.202	0.526745	9.56574e-23
rs11511253	rs367919155	0.993439	1	RP11-291L22.9	ENSG00000276805.2	Nerve - Tibial	G=0.815	C=0.185	0.573705	1.33011e-22
rs11511253	rs12772118	0.961177	0.986831	RP11-291L22.9	ENSG00000276805.2	Skin - Sun Exposed (Lower leg)	T=0.812	G=0.188	0.551886	1.43596e-22
rs11511253	rs11146655	0.961177	0.986831	RP11-291L22.9	ENSG00000276805.2	Skin - Sun Exposed (Lower leg)	A=0.812	G=0.188	0.551886	1.43596e-22
rs11511253	rs9664979	0.961177	0.986831	RP11-291L22.9	ENSG00000276805.2	Skin - Sun Exposed (Lower leg)	G=0.812	A=0.188	0.551886	1.43596e-22
rs11511253	rs7910228	0.961177	0.986831	RP11-291L22.9	ENSG00000276805.2	Skin - Sun Exposed (Lower leg)	A=0.812	T=0.188	0.551886	1.43596e-22
rs11511253	rs144280981	0.986906	0.993431	RP11-291L22.9	ENSG00000276805.2	Nerve - Tibial	C=0.814	T=0.186	0.572549	1.53134e-22
rs11511253	rs7093896	0.993439	1	RP11-291L22.9	ENSG00000276805.2	Nerve - Tibial	A=0.815	T=0.185	0.572549	1.53134e-22
rs11511253	rs3087759	0.993439	1	RP11-291L22.9	ENSG00000276805.2	Nerve - Tibial	A=0.815	C=0.185	0.572549	1.53134e-22
rs11511253	rs4934946	0.993439	1	RP11-291L22.9	ENSG00000276805.2	Nerve - Tibial	T=0.815	C=0.185	0.572549	1.53134e-22
rs11511253	rs11011555	0.993439	1	RP11-291L22.9	ENSG00000276805.2	Nerve - Tibial	T=0.815	C=0.185	0.572549	1.53134e-22
rs11511253	rs61837224	0.993439	1	RP11-291L22.9	ENSG00000276805.2	Nerve - Tibial	G=0.815	C=0.185	0.572549	1.53134e-22
rs11511253	rs117398853	0.993439	1	RP11-291L22.9	ENSG00000276805.2	Nerve - Tibial	C=0.815	G=0.185	0.572549	1.53134e-22
rs11511253	rs9663128	0.993439	1	RP11-291L22.9	ENSG00000276805.2	Nerve - Tibial	C=0.815	G=0.185	0.572549	1.53134e-22
rs11511253	rs7088208	0.986906	0.993431	RP11-291L22.9	ENSG00000276805.2	Nerve - Tibial	T=0.814	C=0.186	0.572549	1.53134e-22
rs11511253	rs117840800	0.993439	1	RP11-291L22.9	ENSG00000276805.2	Nerve - Tibial	A=0.815	G=0.185	0.572549	1.53134e-22
rs11511253	rs74890899	0.986895	1	RP11-291L22.9	ENSG00000276805.2	Nerve - Tibial	C=0.816	T=0.184	0.572549	1.53134e-22
rs11511253	rs1810634	0.993439	1	RP11-291L22.9	ENSG00000276805.2	Nerve - Tibial	A=0.815	G=0.185	0.572549	1.53134e-22
rs11511253	rs9664768	0.993439	1	RP11-291L22.9	ENSG00000276805.2	Nerve - Tibial	G=0.815	A=0.185	0.572549	1.53134e-22
rs11511253	rs72639568	0.993439	1	RP11-291L22.9	ENSG00000276805.2	Nerve - Tibial	G=0.815	A=0.185	0.572549	1.53134e-22
rs11511253	rs77114817	0.986895	1	RP11-291L22.9	ENSG00000276805.2	Nerve - Tibial	T=0.816	C=0.184	0.572549	1.53134e-22
rs11511253	rs11492515	0.993439	1	RP11-291L22.9	ENSG00000276805.2	Nerve - Tibial	C=0.815	T=0.185	0.572549	1.53134e-22
rs11511253	rs11492459	0.993439	1	RP11-291L22.9	ENSG00000276805.2	Nerve - Tibial	T=0.815	C=0.185	0.572549	1.53134e-22
rs11511253	rs7084618	0.993439	1	RP11-291L22.9	ENSG00000276805.2	Nerve - Tibial	A=0.815	T=0.185	0.572549	1.53134e-22
rs11511253	rs7095113	0.993439	1	RP11-291L22.9	ENSG00000276805.2	Nerve - Tibial	G=0.815	A=0.185	0.572549	1.53134e-22
rs11511253	rs148773254	0.993439	1	RP11-291L22.9	ENSG00000276805.2	Nerve - Tibial	C=0.815	T=0.185	0.572549	1.53134e-22
rs11511253	rs4623823	0.993439	1	RP11-291L22.9	ENSG00000276805.2	Nerve - Tibial	C=0.815	T=0.185	0.572549	1.53134e-22
rs11511253	rs35712971	0.993439	1	RP11-291L22.9	ENSG00000276805.2	Nerve - Tibial	A=0.815	T=0.185	0.572549	1.53134e-22
rs11511253	rs11146894	0.986895	1	RP11-291L22.9	ENSG00000276805.2	Nerve - Tibial	G=0.816	A=0.184	0.572549	1.53134e-22
rs11511253	rs4572067	0.993439	1	RP11-291L22.9	ENSG00000276805.2	Nerve - Tibial	G=0.815	T=0.185	0.572549	1.53134e-22
rs11511253	rs11146911	1	1	RP11-291L22.9	ENSG00000276805.2	Nerve - Tibial	C=0.814	A=0.186	0.572549	1.53134e-22
rs11511253	rs7081059	0.961177	0.986831	RP11-291L22.9	ENSG00000276805.2	Skin - Sun Exposed (Lower leg)	C=0.812	A=0.188	0.55036	1.56485e-22
rs11511253	rs34458842	0.967718	0.993407	RP11-291L22.9	ENSG00000276805.2	Skin - Sun Exposed (Lower leg)	TG=0.811	T=0.189	0.551143	1.59066e-22
rs11511253	rs11597330	0.974276	1	RP11-291L22.9	ENSG00000276805.2	Skin - Sun Exposed (Lower leg)	C=0.81	T=0.19	0.54005	1.66624e-22
rs11511253	rs200474745	0.974046	0.993415	RP11-291L22.9	ENSG00000276805.2	Skin - Sun Exposed (Lower leg)	CGAATGGAATG=0.812	C=0.188	0.545218	1.6752e-22
rs11511253	rs35949805	0.896667	0.993309	RP11-291L22.9	ENSG00000276805.2	Skin - Sun Exposed (Lower leg)	G=0.799	A=0.201	0.532388	1.69716e-22
rs11511253	rs12775030	0.993439	1	RP11-291L22.9	ENSG00000276805.2	Nerve - Tibial	C=0.815	T=0.185	0.574126	1.72246e-22
rs11511253	rs2180899	0.728744	1	RP11-291L22.9	ENSG00000276805.2	Skin - Not Sun Exposed (Suprapubic)	G=0.761	A=0.239	0.531999	1.85071e-22
rs11511253	rs11596501	0.986895	1	RP11-291L22.9	ENSG00000276805.2	Skin - Sun Exposed (Lower leg)	G=0.816	A=0.184	0.55257	1.85951e-22
rs11511253	rs74798172	0.879145	0.986601	RP11-291L22.9	ENSG00000276805.2	Skin - Sun Exposed (Lower leg)	C=0.798	G=0.202	0.52903	1.86734e-22
rs11511253	rs4088497	0.993466	1	RP11-291L22.9	ENSG00000276805.2	Nerve - Tibial	T=0.813	C=0.187	0.58393	2.03504e-22
rs11511253	rs11011542	0.980366	1	RP11-291L22.9	ENSG00000276805.2	Skin - Sun Exposed (Lower leg)	C=0.817	T=0.183	0.555467	2.40133e-22
rs11511253	rs7068733	0.948142	0.973726	RP11-291L22.9	ENSG00000276805.2	Nerve - Tibial	C=0.814	G=0.186	0.570252	2.46754e-22
rs11511253	rs7087510	0.891125	0.993301	RP11-291L22.9	ENSG00000276805.2	Skin - Not Sun Exposed (Suprapubic)	G=0.798	A=0.202	0.545648	2.66818e-22
rs11511253	rs138310998	0.891125	0.993301	RP11-291L22.9	ENSG00000276805.2	Skin - Not Sun Exposed (Suprapubic)	G=0.798	A=0.202	0.545648	2.66818e-22
rs11511253	rs4070543	0.891125	0.993301	RP11-291L22.9	ENSG00000276805.2	Skin - Not Sun Exposed (Suprapubic)	G=0.798	A=0.202	0.545648	2.66818e-22
rs11511253	rs12571329	0.891125	0.993301	RP11-291L22.9	ENSG00000276805.2	Skin - Not Sun Exposed (Suprapubic)	G=0.798	A=0.202	0.545648	2.66818e-22
rs11511253	rs7069025	0.891125	0.993301	RP11-291L22.9	ENSG00000276805.2	Skin - Not Sun Exposed (Suprapubic)	G=0.798	A=0.202	0.545648	2.66818e-22
rs11511253	rs12770432	0.891125	0.993301	RP11-291L22.9	ENSG00000276805.2	Skin - Not Sun Exposed (Suprapubic)	G=0.798	A=0.202	0.545648	2.66818e-22
rs11511253	rs11592779	0.872669	0.979927	RP11-291L22.9	ENSG00000276805.2	Skin - Not Sun Exposed (Suprapubic)	C=0.799	T=0.201	0.545648	2.66818e-22
rs11511253	rs4881586	0.86621	0.973269	RP11-291L22.9	ENSG00000276805.2	Skin - Not Sun Exposed (Suprapubic)	C=0.8	T=0.2	0.545648	2.66818e-22
rs11511253	rs7923903	0.879145	0.986601	RP11-291L22.9	ENSG00000276805.2	Skin - Not Sun Exposed (Suprapubic)	G=0.798	A=0.202	0.545648	2.66818e-22
rs11511253	rs7896006	0.879145	0.986601	RP11-291L22.9	ENSG00000276805.2	Skin - Not Sun Exposed (Suprapubic)	C=0.798	T=0.202	0.545648	2.66818e-22
rs11511253	rs7896545	0.879145	0.986601	RP11-291L22.9	ENSG00000276805.2	Skin - Not Sun Exposed (Suprapubic)	C=0.798	T=0.202	0.545648	2.66818e-22
rs11511253	rs7076099	0.879145	0.986601	RP11-291L22.9	ENSG00000276805.2	Skin - Not Sun Exposed (Suprapubic)	G=0.798	A=0.202	0.545648	2.66818e-22
rs11511253	rs10870418	0.961177	0.986831	RP11-291L22.9	ENSG00000276805.2	Skin - Sun Exposed (Lower leg)	C=0.812	T=0.188	0.549146	2.67354e-22
rs11511253	rs4881585	0.961177	0.986831	RP11-291L22.9	ENSG00000276805.2	Skin - Sun Exposed (Lower leg)	A=0.812	G=0.188	0.549146	2.67354e-22
rs11511253	rs12570560	0.891125	0.993301	RP11-291L22.9	ENSG00000276805.2	Skin - Not Sun Exposed (Suprapubic)	C=0.798	G=0.202	0.546235	2.68146e-22
rs11511253	rs200220357	0.993439	1	RP11-291L22.9	ENSG00000276805.2	Nerve - Tibial	C=0.815	T=0.185	0.577143	2.69145e-22
rs11511253	rs3970136	0.891125	0.993301	RP11-291L22.9	ENSG00000276805.2	Skin - Sun Exposed (Lower leg)	T=0.798	C=0.202	0.522023	2.70906e-22
rs11511253	rs11146675	0.891125	0.993301	RP11-291L22.9	ENSG00000276805.2	Skin - Sun Exposed (Lower leg)	G=0.798	T=0.202	0.522023	2.70906e-22
rs11511253	rs11146869	0.993439	1	RP11-291L22.9	ENSG00000276805.2	Skin - Sun Exposed (Lower leg)	A=0.815	G=0.185	0.548929	2.74031e-22
rs11511253	rs61839284	0.993439	1	RP11-291L22.9	ENSG00000276805.2	Skin - Sun Exposed (Lower leg)	A=0.815	C=0.185	0.548929	2.74031e-22
rs11511253	rs34019437	0.993439	1	RP11-291L22.9	ENSG00000276805.2	Skin - Sun Exposed (Lower leg)	C=0.815	T=0.185	0.548929	2.74031e-22
rs11511253	rs4326715	0.993466	1	RP11-291L22.9	ENSG00000276805.2	Skin - Sun Exposed (Lower leg)	A=0.813	G=0.187	0.548929	2.74031e-22
rs11511253	rs2310210	0.980362	0.993396	RP11-291L22.9	ENSG00000276805.2	Skin - Sun Exposed (Lower leg)	G=0.815	A=0.185	0.548929	2.74031e-22
rs11511253	rs200253039	0.993439	1	RP11-291L22.9	ENSG00000276805.2	Skin - Not Sun Exposed (Suprapubic)	C=0.815	T=0.185	0.574816	2.80576e-22
rs11511253	rs4881618	0.993466	1	RP11-291L22.9	ENSG00000276805.2	Skin - Sun Exposed (Lower leg)	G=0.813	T=0.187	0.547558	2.90573e-22
rs11511253	rs77578626	0.967718	0.993407	RP11-291L22.9	ENSG00000276805.2	Skin - Sun Exposed (Lower leg)	A=0.811	G=0.189	0.536852	2.92597e-22
rs11511253	rs61840410	0.891125	0.993301	RP11-291L22.9	ENSG00000276805.2	Skin - Not Sun Exposed (Suprapubic)	C=0.798	T=0.202	0.547566	3.30406e-22
rs11511253	rs7076118	0.986895	1	RP11-291L22.9	ENSG00000276805.2	Skin - Sun Exposed (Lower leg)	C=0.816	A=0.184	0.549323	4.03956e-22
rs11511253	rs2180800	0.980362	0.993396	RP11-291L22.9	ENSG00000276805.2	Skin - Sun Exposed (Lower leg)	C=0.815	T=0.185	0.546341	4.73825e-22
rs11511253	rs35712971	0.993439	1	RP11-291L22.9	ENSG00000276805.2	Skin - Not Sun Exposed (Suprapubic)	A=0.815	T=0.185	0.572353	4.74989e-22
rs11511253	rs7099107	0.967718	0.993407	RP11-291L22.9	ENSG00000276805.2	Nerve - Tibial	G=0.811	A=0.189	0.566728	5.18698e-22
rs11511253	rs11146654	0.967718	0.993407	RP11-291L22.9	ENSG00000276805.2	Nerve - Tibial	C=0.811	T=0.189	0.567877	5.36261e-22
rs11511253	rs9731107	0.967718	0.993407	RP11-291L22.9	ENSG00000276805.2	Nerve - Tibial	G=0.811	A=0.189	0.567877	5.36261e-22
rs11511253	rs7071794	0.967718	0.993407	RP11-291L22.9	ENSG00000276805.2	Nerve - Tibial	T=0.811	A=0.189	0.567877	5.36261e-22
rs11511253	rs11146702	0.967718	0.993407	RP11-291L22.9	ENSG00000276805.2	Nerve - Tibial	G=0.811	A=0.189	0.567877	5.36261e-22
rs11511253	rs11146709	0.967718	0.993407	RP11-291L22.9	ENSG00000276805.2	Nerve - Tibial	C=0.811	T=0.189	0.567877	5.36261e-22
rs11511253	rs11146713	0.967718	0.993407	RP11-291L22.9	ENSG00000276805.2	Nerve - Tibial	G=0.811	T=0.189	0.567877	5.36261e-22
rs11511253	rs11597575	0.967718	0.993407	RP11-291L22.9	ENSG00000276805.2	Nerve - Tibial	G=0.811	C=0.189	0.567877	5.36261e-22
rs11511253	rs10870406	0.967718	0.993407	RP11-291L22.9	ENSG00000276805.2	Nerve - Tibial	G=0.811	A=0.189	0.567877	5.36261e-22
rs11511253	rs4881578	0.967718	0.993407	RP11-291L22.9	ENSG00000276805.2	Nerve - Tibial	G=0.811	A=0.189	0.567877	5.36261e-22
rs11511253	rs4881584	0.967718	0.993407	RP11-291L22.9	ENSG00000276805.2	Nerve - Tibial	C=0.811	T=0.189	0.567877	5.36261e-22
rs11511253	rs11146753	0.967718	0.993407	RP11-291L22.9	ENSG00000276805.2	Nerve - Tibial	A=0.811	G=0.189	0.567877	5.36261e-22
rs11511253	rs10870421	0.967718	0.993407	RP11-291L22.9	ENSG00000276805.2	Nerve - Tibial	C=0.811	A=0.189	0.567877	5.36261e-22
rs11511253	rs11146784	0.961456	0.993399	RP11-291L22.9	ENSG00000276805.2	Nerve - Tibial	C=0.81	T=0.19	0.567877	5.36261e-22
rs11511253	rs12357698	0.967718	0.993407	RP11-291L22.9	ENSG00000276805.2	Nerve - Tibial	T=0.811	A=0.189	0.567877	5.36261e-22
rs11511253	rs4556804	0.967718	0.993407	RP11-291L22.9	ENSG00000276805.2	Nerve - Tibial	G=0.811	A=0.189	0.567877	5.36261e-22
rs11511253	rs144280981	0.986906	0.993431	RP11-291L22.9	ENSG00000276805.2	Skin - Not Sun Exposed (Suprapubic)	C=0.814	T=0.186	0.570166	5.68242e-22
rs11511253	rs7093896	0.993439	1	RP11-291L22.9	ENSG00000276805.2	Skin - Not Sun Exposed (Suprapubic)	A=0.815	T=0.185	0.570166	5.68242e-22
rs11511253	rs3087759	0.993439	1	RP11-291L22.9	ENSG00000276805.2	Skin - Not Sun Exposed (Suprapubic)	A=0.815	C=0.185	0.570166	5.68242e-22
rs11511253	rs4934946	0.993439	1	RP11-291L22.9	ENSG00000276805.2	Skin - Not Sun Exposed (Suprapubic)	T=0.815	C=0.185	0.570166	5.68242e-22
rs11511253	rs11011555	0.993439	1	RP11-291L22.9	ENSG00000276805.2	Skin - Not Sun Exposed (Suprapubic)	T=0.815	C=0.185	0.570166	5.68242e-22
rs11511253	rs61837224	0.993439	1	RP11-291L22.9	ENSG00000276805.2	Skin - Not Sun Exposed (Suprapubic)	G=0.815	C=0.185	0.570166	5.68242e-22
rs11511253	rs117398853	0.993439	1	RP11-291L22.9	ENSG00000276805.2	Skin - Not Sun Exposed (Suprapubic)	C=0.815	G=0.185	0.570166	5.68242e-22
rs11511253	rs9663128	0.993439	1	RP11-291L22.9	ENSG00000276805.2	Skin - Not Sun Exposed (Suprapubic)	C=0.815	G=0.185	0.570166	5.68242e-22
rs11511253	rs7088208	0.986906	0.993431	RP11-291L22.9	ENSG00000276805.2	Skin - Not Sun Exposed (Suprapubic)	T=0.814	C=0.186	0.570166	5.68242e-22
rs11511253	rs117840800	0.993439	1	RP11-291L22.9	ENSG00000276805.2	Skin - Not Sun Exposed (Suprapubic)	A=0.815	G=0.185	0.570166	5.68242e-22
rs11511253	rs74890899	0.986895	1	RP11-291L22.9	ENSG00000276805.2	Skin - Not Sun Exposed (Suprapubic)	C=0.816	T=0.184	0.570166	5.68242e-22
rs11511253	rs1810634	0.993439	1	RP11-291L22.9	ENSG00000276805.2	Skin - Not Sun Exposed (Suprapubic)	A=0.815	G=0.185	0.570166	5.68242e-22
rs11511253	rs9664768	0.993439	1	RP11-291L22.9	ENSG00000276805.2	Skin - Not Sun Exposed (Suprapubic)	G=0.815	A=0.185	0.570166	5.68242e-22
rs11511253	rs72639568	0.993439	1	RP11-291L22.9	ENSG00000276805.2	Skin - Not Sun Exposed (Suprapubic)	G=0.815	A=0.185	0.570166	5.68242e-22
rs11511253	rs77114817	0.986895	1	RP11-291L22.9	ENSG00000276805.2	Skin - Not Sun Exposed (Suprapubic)	T=0.816	C=0.184	0.570166	5.68242e-22
rs11511253	rs11492515	0.993439	1	RP11-291L22.9	ENSG00000276805.2	Skin - Not Sun Exposed (Suprapubic)	C=0.815	T=0.185	0.570166	5.68242e-22
rs11511253	rs11492459	0.993439	1	RP11-291L22.9	ENSG00000276805.2	Skin - Not Sun Exposed (Suprapubic)	T=0.815	C=0.185	0.570166	5.68242e-22
rs11511253	rs7084618	0.993439	1	RP11-291L22.9	ENSG00000276805.2	Skin - Not Sun Exposed (Suprapubic)	A=0.815	T=0.185	0.570166	5.68242e-22
rs11511253	rs7095113	0.993439	1	RP11-291L22.9	ENSG00000276805.2	Skin - Not Sun Exposed (Suprapubic)	G=0.815	A=0.185	0.570166	5.68242e-22
rs11511253	rs148773254	0.993439	1	RP11-291L22.9	ENSG00000276805.2	Skin - Not Sun Exposed (Suprapubic)	C=0.815	T=0.185	0.570166	5.68242e-22
rs11511253	rs12775030	0.993439	1	RP11-291L22.9	ENSG00000276805.2	Skin - Not Sun Exposed (Suprapubic)	C=0.815	T=0.185	0.570166	5.68242e-22
rs11511253	rs4623823	0.993439	1	RP11-291L22.9	ENSG00000276805.2	Skin - Not Sun Exposed (Suprapubic)	C=0.815	T=0.185	0.570166	5.68242e-22
rs11511253	rs4572067	0.993439	1	RP11-291L22.9	ENSG00000276805.2	Skin - Not Sun Exposed (Suprapubic)	G=0.815	T=0.185	0.570166	5.68242e-22
rs11511253	rs11146911	1	1	RP11-291L22.9	ENSG00000276805.2	Skin - Not Sun Exposed (Suprapubic)	C=0.814	A=0.186	0.570166	5.68242e-22
rs11511253	rs11812823	0.986895	1	RP11-291L22.9	ENSG00000276805.2	Skin - Sun Exposed (Lower leg)	T=0.816	C=0.184	0.549005	5.73068e-22
rs11511253	rs112309001	0.986895	1	RP11-291L22.9	ENSG00000276805.2	Skin - Sun Exposed (Lower leg)	AG=0.816	A=0.184	0.549005	5.73068e-22
rs11511253	rs2012084	0.973898	0.986863	RP11-291L22.9	ENSG00000276805.2	Skin - Sun Exposed (Lower leg)	T=0.814	C=0.186	0.549005	5.73068e-22
rs11511253	rs35747454	0.986895	1	RP11-291L22.9	ENSG00000276805.2	Skin - Sun Exposed (Lower leg)	G=0.816	T=0.184	0.549005	5.73068e-22
rs11511253	rs12354584	0.986895	1	RP11-291L22.9	ENSG00000276805.2	Skin - Sun Exposed (Lower leg)	G=0.816	T=0.184	0.549005	5.73068e-22
rs11511253	rs11511148	0.986895	1	RP11-291L22.9	ENSG00000276805.2	Skin - Sun Exposed (Lower leg)	C=0.816	T=0.184	0.549005	5.73068e-22
rs11511253	rs11011567	0.986895	1	RP11-291L22.9	ENSG00000276805.2	Skin - Sun Exposed (Lower leg)	A=0.816	G=0.184	0.549005	5.73068e-22
rs11511253	rs28413086	0.986895	1	RP11-291L22.9	ENSG00000276805.2	Skin - Sun Exposed (Lower leg)	T=0.816	G=0.184	0.549005	5.73068e-22
rs11511253	rs35451472	0.986895	1	RP11-291L22.9	ENSG00000276805.2	Skin - Sun Exposed (Lower leg)	C=0.816	T=0.184	0.549005	5.73068e-22
rs11511253	rs61837257	0.993439	1	RP11-291L22.9	ENSG00000276805.2	Nerve - Tibial	C=0.815	G=0.185	0.56751	6.09578e-22
rs11511253	rs79613030	0.993439	1	RP11-291L22.9	ENSG00000276805.2	Skin - Not Sun Exposed (Suprapubic)	G=0.815	A=0.185	0.569747	6.19523e-22
rs11511253	rs61839484	0.993439	1	RP11-291L22.9	ENSG00000276805.2	Skin - Not Sun Exposed (Suprapubic)	G=0.815	A=0.185	0.569747	6.19523e-22
rs11511253	rs7074243	0.961456	0.993399	RP11-291L22.9	ENSG00000276805.2	Nerve - Tibial	A=0.81	T=0.19	0.565817	6.24756e-22
rs11511253	rs11146768	0.967718	0.993407	RP11-291L22.9	ENSG00000276805.2	Nerve - Tibial	C=0.811	T=0.189	0.565817	6.24756e-22
rs11511253	rs7070930	0.986895	1	RP11-291L22.9	ENSG00000276805.2	Skin - Sun Exposed (Lower leg)	G=0.816	C=0.184	0.544723	6.4607e-22
rs11511253	rs80081575	0.986895	1	RP11-291L22.9	ENSG00000276805.2	Skin - Sun Exposed (Lower leg)	G=0.816	A=0.184	0.544723	6.4607e-22
rs11511253	rs7068365	0.967718	0.993407	RP11-291L22.9	ENSG00000276805.2	Nerve - Tibial	C=0.811	T=0.189	0.568166	6.53987e-22
rs11511253	rs12773561	0.967718	0.993407	RP11-291L22.9	ENSG00000276805.2	Nerve - Tibial	G=0.811	C=0.189	0.563727	6.72173e-22
rs11511253	rs7089593	0.980362	0.993396	RP11-291L22.9	ENSG00000276805.2	Skin - Sun Exposed (Lower leg)	A=0.815	G=0.185	0.545817	6.72468e-22
rs11511253	rs7089975	0.980362	0.993396	RP11-291L22.9	ENSG00000276805.2	Skin - Sun Exposed (Lower leg)	A=0.815	G=0.185	0.545817	6.72468e-22
rs11511253	rs12570560	0.891125	0.993301	RP11-291L22.9	ENSG00000276805.2	Nerve - Tibial	C=0.798	G=0.202	0.530215	6.75396e-22
rs11511253	rs10870362	0.993466	1	RP11-291L22.9	ENSG00000276805.2	Nerve - Tibial	G=0.813	A=0.187	0.57388	7.23471e-22
rs11511253	rs10764162	0.616859	0.98546	RP11-291L22.9	ENSG00000276805.2	Skin - Sun Exposed (Lower leg)	C=0.736	T=0.264	0.501418	7.30771e-22
rs11511253	rs7095128	0.993439	1	RP11-291L22.9	ENSG00000276805.2	Nerve - Tibial	G=0.815	C=0.185	0.570109	7.91926e-22
rs11511253	rs4881618	0.993466	1	RP11-291L22.9	ENSG00000276805.2	Skin - Not Sun Exposed (Suprapubic)	G=0.813	T=0.187	0.56727	7.96418e-22
rs11511253	rs11011543	0.986895	1	RP11-291L22.9	ENSG00000276805.2	Nerve - Tibial	A=0.816	T=0.184	0.564772	8.10684e-22
rs11511253	rs10827866	0.986895	1	RP11-291L22.9	ENSG00000276805.2	Nerve - Tibial	G=0.816	T=0.184	0.564772	8.10684e-22
rs11511253	rs66610970	0.986895	1	RP11-291L22.9	ENSG00000276805.2	Nerve - Tibial	CT=0.816	C=0.184	0.564772	8.10684e-22
rs11511253	rs138284504	0.986895	1	RP11-291L22.9	ENSG00000276805.2	Nerve - Tibial	C=0.816	T=0.184	0.564772	8.10684e-22
rs11511253	rs10827867	0.986895	1	RP11-291L22.9	ENSG00000276805.2	Nerve - Tibial	T=0.816	C=0.184	0.564772	8.10684e-22
rs11511253	rs3970136	0.891125	0.993301	RP11-291L22.9	ENSG00000276805.2	Skin - Not Sun Exposed (Suprapubic)	T=0.798	C=0.202	0.544179	8.68689e-22
rs11511253	rs11146675	0.891125	0.993301	RP11-291L22.9	ENSG00000276805.2	Skin - Not Sun Exposed (Suprapubic)	G=0.798	T=0.202	0.544179	8.68689e-22
rs11511253	rs12358135	0.879145	0.986601	RP11-291L22.9	ENSG00000276805.2	Skin - Not Sun Exposed (Suprapubic)	C=0.798	T=0.202	0.544179	8.68689e-22
rs11511253	rs11011543	0.986895	1	RP11-291L22.9	ENSG00000276805.2	Skin - Not Sun Exposed (Suprapubic)	A=0.816	T=0.184	0.567598	9.04527e-22
rs11511253	rs10827866	0.986895	1	RP11-291L22.9	ENSG00000276805.2	Skin - Not Sun Exposed (Suprapubic)	G=0.816	T=0.184	0.567598	9.04527e-22
rs11511253	rs66610970	0.986895	1	RP11-291L22.9	ENSG00000276805.2	Skin - Not Sun Exposed (Suprapubic)	CT=0.816	C=0.184	0.567598	9.04527e-22
rs11511253	rs138284504	0.986895	1	RP11-291L22.9	ENSG00000276805.2	Skin - Not Sun Exposed (Suprapubic)	C=0.816	T=0.184	0.567598	9.04527e-22
rs11511253	rs10827867	0.986895	1	RP11-291L22.9	ENSG00000276805.2	Skin - Not Sun Exposed (Suprapubic)	T=0.816	C=0.184	0.567598	9.04527e-22
rs11511253	rs7087510	0.891125	0.993301	RP11-291L22.9	ENSG00000276805.2	Nerve - Tibial	G=0.798	A=0.202	0.527916	9.19455e-22
rs11511253	rs138310998	0.891125	0.993301	RP11-291L22.9	ENSG00000276805.2	Nerve - Tibial	G=0.798	A=0.202	0.527916	9.19455e-22
rs11511253	rs12571329	0.891125	0.993301	RP11-291L22.9	ENSG00000276805.2	Nerve - Tibial	G=0.798	A=0.202	0.527916	9.19455e-22
rs11511253	rs7069025	0.891125	0.993301	RP11-291L22.9	ENSG00000276805.2	Nerve - Tibial	G=0.798	A=0.202	0.527916	9.19455e-22
rs11511253	rs12770432	0.891125	0.993301	RP11-291L22.9	ENSG00000276805.2	Nerve - Tibial	G=0.798	A=0.202	0.527916	9.19455e-22
rs11511253	rs11592779	0.872669	0.979927	RP11-291L22.9	ENSG00000276805.2	Nerve - Tibial	C=0.799	T=0.201	0.527916	9.19455e-22
rs11511253	rs7923903	0.879145	0.986601	RP11-291L22.9	ENSG00000276805.2	Nerve - Tibial	G=0.798	A=0.202	0.527916	9.19455e-22
rs11511253	rs7896006	0.879145	0.986601	RP11-291L22.9	ENSG00000276805.2	Nerve - Tibial	C=0.798	T=0.202	0.527916	9.19455e-22
rs11511253	rs7896545	0.879145	0.986601	RP11-291L22.9	ENSG00000276805.2	Nerve - Tibial	C=0.798	T=0.202	0.527916	9.19455e-22
rs11511253	rs7076099	0.879145	0.986601	RP11-291L22.9	ENSG00000276805.2	Nerve - Tibial	G=0.798	A=0.202	0.527916	9.19455e-22
rs11511253	rs61839915	0.980362	0.993396	RP11-291L22.9	ENSG00000276805.2	Skin - Sun Exposed (Lower leg)	C=0.815	T=0.185	0.5431	9.73044e-22
rs11511253	rs4070543	0.891125	0.993301	RP11-291L22.9	ENSG00000276805.2	Nerve - Tibial	G=0.798	A=0.202	0.525618	1.00014e-21
rs11511253	rs61840410	0.891125	0.993301	RP11-291L22.9	ENSG00000276805.2	Nerve - Tibial	C=0.798	T=0.202	0.529509	1.07881e-21
rs11511253	rs61837257	0.993439	1	RP11-291L22.9	ENSG00000276805.2	Skin - Not Sun Exposed (Suprapubic)	C=0.815	G=0.185	0.565774	1.15928e-21
rs11511253	rs10764157	0.980366	1	RP11-291L22.9	ENSG00000276805.2	Skin - Sun Exposed (Lower leg)	A=0.817	G=0.183	0.546815	1.17434e-21
rs11511253	rs2021018	0.980366	1	RP11-291L22.9	ENSG00000276805.2	Skin - Sun Exposed (Lower leg)	G=0.817	A=0.183	0.546815	1.17434e-21
rs11511253	rs7071245	0.980366	1	RP11-291L22.9	ENSG00000276805.2	Skin - Sun Exposed (Lower leg)	G=0.817	A=0.183	0.546815	1.17434e-21
rs11511253	rs10827863	0.980366	1	RP11-291L22.9	ENSG00000276805.2	Skin - Sun Exposed (Lower leg)	T=0.817	C=0.183	0.546815	1.17434e-21
rs11511253	rs4881586	0.86621	0.973269	RP11-291L22.9	ENSG00000276805.2	Nerve - Tibial	C=0.8	T=0.2	0.528086	1.26481e-21
rs11511253	rs11146613	0.993439	1	RP11-291L22.9	ENSG00000276805.2	Skin - Sun Exposed (Lower leg)	C=0.815	T=0.185	0.547911	1.29368e-21
rs11511253	rs11146699	0.967718	0.993407	RP11-291L22.9	ENSG00000276805.2	Skin - Sun Exposed (Lower leg)	G=0.811	A=0.189	0.54053	1.35247e-21
rs11511253	rs200220357	0.993439	1	RP11-291L22.9	ENSG00000276805.2	Skin - Not Sun Exposed (Suprapubic)	C=0.815	T=0.185	0.568628	1.35609e-21
rs11511253	rs12775411	0.95526	0.993391	RP11-291L22.9	ENSG00000276805.2	Nerve - Tibial	G=0.809	A=0.191	0.560443	1.36121e-21
rs11511253	rs1902549	0.967718	0.993407	RP11-291L22.9	ENSG00000276805.2	Nerve - Tibial	C=0.811	T=0.189	0.565272	1.38024e-21
rs11511253	rs79613030	0.993439	1	RP11-291L22.9	ENSG00000276805.2	Nerve - Tibial	G=0.815	A=0.185	0.56009	1.57031e-21
rs11511253	rs61839484	0.993439	1	RP11-291L22.9	ENSG00000276805.2	Nerve - Tibial	G=0.815	A=0.185	0.56009	1.57031e-21
rs11511253	rs34873071	0.986895	1	RP11-291L22.9	ENSG00000276805.2	Skin - Sun Exposed (Lower leg)	G=0.816	T=0.184	0.543257	1.69775e-21
rs11511253	rs58673518	0.986895	1	RP11-291L22.9	ENSG00000276805.2	Skin - Sun Exposed (Lower leg)	G=0.816	T=0.184	0.543257	1.69775e-21
rs11511253	rs2085430	0.993439	1	RP11-291L22.9	ENSG00000276805.2	Skin - Sun Exposed (Lower leg)	C=0.815	G=0.185	0.543257	1.69775e-21
rs11511253	rs10870459	0.986895	1	RP11-291L22.9	ENSG00000276805.2	Skin - Sun Exposed (Lower leg)	A=0.816	G=0.184	0.543257	1.69775e-21
rs11511253	rs182246855	0.973833	0.99336	RP11-291L22.9	ENSG00000276805.2	Skin - Sun Exposed (Lower leg)	G=0.816	A=0.184	0.543257	1.69775e-21
rs11511253	rs12359136	0.986906	0.993431	RP11-291L22.9	ENSG00000276805.2	Skin - Sun Exposed (Lower leg)	A=0.814	T=0.186	0.543257	1.69775e-21
rs11511253	rs11146640	0.993439	1	RP11-291L22.9	ENSG00000276805.2	Skin - Sun Exposed (Lower leg)	G=0.815	A=0.185	0.543257	1.69775e-21
rs11511253	rs74798172	0.879145	0.986601	RP11-291L22.9	ENSG00000276805.2	Skin - Not Sun Exposed (Suprapubic)	C=0.798	G=0.202	0.546919	1.76021e-21
rs11511253	rs11146894	0.986895	1	RP11-291L22.9	ENSG00000276805.2	Skin - Not Sun Exposed (Suprapubic)	G=0.816	A=0.184	0.566628	1.83171e-21
rs11511253	rs11146655	0.961177	0.986831	RP11-291L22.9	ENSG00000276805.2	Nerve - Tibial	A=0.812	G=0.188	0.566127	1.98882e-21
rs11511253	rs11511253	1	1	RP11-291L22.9	ENSG00000276805.2	Skin - Not Sun Exposed (Suprapubic)	G=0.814	A=0.186	0.566092	2.0825e-21
rs11511253	rs11595308	1	1	RP11-291L22.9	ENSG00000276805.2	Skin - Not Sun Exposed (Suprapubic)	C=0.814	A=0.186	0.566092	2.0825e-21
rs11511253	rs11146621	0.993466	1	RP11-291L22.9	ENSG00000276805.2	Skin - Not Sun Exposed (Suprapubic)	G=0.813	A=0.187	0.566092	2.0825e-21
rs11511253	rs2310211	0.993466	1	RP11-291L22.9	ENSG00000276805.2	Skin - Not Sun Exposed (Suprapubic)	G=0.813	A=0.187	0.566092	2.0825e-21
rs11511253	rs11011533	0.986895	1	RP11-291L22.9	ENSG00000276805.2	Skin - Not Sun Exposed (Suprapubic)	G=0.816	A=0.184	0.563629	2.23711e-21
rs11511253	rs10827860	0.986895	1	RP11-291L22.9	ENSG00000276805.2	Skin - Not Sun Exposed (Suprapubic)	G=0.816	A=0.184	0.563629	2.23711e-21
rs11511253	rs10827862	0.986895	1	RP11-291L22.9	ENSG00000276805.2	Skin - Not Sun Exposed (Suprapubic)	C=0.816	A=0.184	0.563629	2.23711e-21
rs11511253	rs7917312	0.986895	1	RP11-291L22.9	ENSG00000276805.2	Skin - Not Sun Exposed (Suprapubic)	C=0.816	T=0.184	0.563629	2.23711e-21
rs11511253	rs11817950	0.954916	0.986815	RP11-291L22.9	ENSG00000276805.2	Nerve - Tibial	C=0.811	T=0.189	0.554996	2.42365e-21
rs11511253	rs7095128	0.993439	1	RP11-291L22.9	ENSG00000276805.2	Skin - Not Sun Exposed (Suprapubic)	G=0.815	C=0.185	0.56397	2.70522e-21
rs11511253	rs11146869	0.993439	1	RP11-291L22.9	ENSG00000276805.2	Skin - Not Sun Exposed (Suprapubic)	A=0.815	G=0.185	0.56397	2.70522e-21
rs11511253	rs61839284	0.993439	1	RP11-291L22.9	ENSG00000276805.2	Skin - Not Sun Exposed (Suprapubic)	A=0.815	C=0.185	0.56397	2.70522e-21
rs11511253	rs34019437	0.993439	1	RP11-291L22.9	ENSG00000276805.2	Skin - Not Sun Exposed (Suprapubic)	C=0.815	T=0.185	0.56397	2.70522e-21
rs11511253	rs4326715	0.993466	1	RP11-291L22.9	ENSG00000276805.2	Skin - Not Sun Exposed (Suprapubic)	A=0.813	G=0.187	0.56397	2.70522e-21
rs11511253	rs2310210	0.980362	0.993396	RP11-291L22.9	ENSG00000276805.2	Skin - Not Sun Exposed (Suprapubic)	G=0.815	A=0.185	0.56397	2.70522e-21
rs11511253	rs71500456	0.967718	0.993407	RP11-291L22.9	ENSG00000276805.2	Skin - Sun Exposed (Lower leg)	C=0.811	T=0.189	0.554265	2.9637e-21
rs11511253	rs34458842	0.967718	0.993407	RP11-291L22.9	ENSG00000276805.2	Nerve - Tibial	TG=0.811	T=0.189	0.56196	2.97079e-21
rs11511253	rs12571507	0.936072	0.980198	RP11-291L22.9	ENSG00000276805.2	Skin - Not Sun Exposed (Suprapubic)	C=0.81	T=0.19	0.56228	3.10153e-21
rs11511253	rs11146775	0.967718	0.993407	RP11-291L22.9	ENSG00000276805.2	Skin - Sun Exposed (Lower leg)	C=0.811	T=0.189	0.548652	3.12193e-21
rs11511253	rs7089032	0.967718	0.993407	RP11-291L22.9	ENSG00000276805.2	Skin - Sun Exposed (Lower leg)	G=0.811	T=0.189	0.555137	3.12196e-21
rs11511253	rs71500469	0.967718	0.993407	RP11-291L22.9	ENSG00000276805.2	Nerve - Tibial	T=0.811	G=0.189	0.579231	3.159e-21
rs11511253	rs3928516	0.993466	1	RP11-291L22.9	ENSG00000276805.2	Skin - Not Sun Exposed (Suprapubic)	G=0.813	T=0.187	0.561633	3.24133e-21
rs11511253	rs111563184	0.891243	0.947169	RP11-291L22.9	ENSG00000276805.2	Skin - Not Sun Exposed (Suprapubic)	G=0.815	GC=0.185	0.560325	3.43716e-21
rs11511253	rs11011546	0.986895	1	RP11-291L22.9	ENSG00000276805.2	Nerve - Tibial	G=0.816	A=0.184	0.563829	3.55038e-21
rs11511253	rs2310280	0.986895	1	RP11-291L22.9	ENSG00000276805.2	Skin - Sun Exposed (Lower leg)	A=0.816	G=0.184	0.539606	3.57152e-21
rs11511253	rs11146877	0.986895	1	RP11-291L22.9	ENSG00000276805.2	Skin - Sun Exposed (Lower leg)	C=0.816	T=0.184	0.539606	3.57152e-21
rs11511253	rs35949805	0.896667	0.993309	RP11-291L22.9	ENSG00000276805.2	Skin - Not Sun Exposed (Suprapubic)	G=0.799	A=0.201	0.545805	3.72758e-21
rs11511253	rs11146869	0.993439	1	RP11-291L22.9	ENSG00000276805.2	Nerve - Tibial	A=0.815	G=0.185	0.561144	3.87293e-21
rs11511253	rs61839284	0.993439	1	RP11-291L22.9	ENSG00000276805.2	Nerve - Tibial	A=0.815	C=0.185	0.561144	3.87293e-21
rs11511253	rs34019437	0.993439	1	RP11-291L22.9	ENSG00000276805.2	Nerve - Tibial	C=0.815	T=0.185	0.561144	3.87293e-21
rs11511253	rs4326715	0.993466	1	RP11-291L22.9	ENSG00000276805.2	Nerve - Tibial	A=0.813	G=0.187	0.561144	3.87293e-21
rs11511253	rs2310210	0.980362	0.993396	RP11-291L22.9	ENSG00000276805.2	Nerve - Tibial	G=0.815	A=0.185	0.561144	3.87293e-21
rs11511253	rs11011546	0.986895	1	RP11-291L22.9	ENSG00000276805.2	Skin - Not Sun Exposed (Suprapubic)	G=0.816	A=0.184	0.56223	3.96168e-21
rs11511253	rs4088497	0.993466	1	RP11-291L22.9	ENSG00000276805.2	Skin - Not Sun Exposed (Suprapubic)	T=0.813	C=0.187	0.56964	4.10356e-21
rs11511253	rs367919155	0.993439	1	RP11-291L22.9	ENSG00000276805.2	Skin - Not Sun Exposed (Suprapubic)	G=0.815	C=0.185	0.561768	4.16783e-21
rs11511253	rs11011501	0.967321	0.993324	RP11-291L22.9	ENSG00000276805.2	Skin - Sun Exposed (Lower leg)	G=0.817	A=0.183	0.539906	4.17638e-21
rs11511253	rs11011509	0.973833	0.99336	RP11-291L22.9	ENSG00000276805.2	Skin - Sun Exposed (Lower leg)	G=0.816	A=0.184	0.539906	4.17638e-21
rs11511253	rs7100199	0.96737	0.986792	RP11-291L22.9	ENSG00000276805.2	Skin - Sun Exposed (Lower leg)	T=0.815	C=0.185	0.539906	4.17638e-21
rs11511253	rs36072007	0.961177	0.986831	RP11-291L22.9	ENSG00000276805.2	Skin - Sun Exposed (Lower leg)	T=0.812	TA=0.188	0.536304	4.55701e-21
rs11511253	rs77578626	0.967718	0.993407	RP11-291L22.9	ENSG00000276805.2	Skin - Not Sun Exposed (Suprapubic)	A=0.811	G=0.189	0.543738	5.0143e-21
rs11511253	rs4881618	0.993466	1	RP11-291L22.9	ENSG00000276805.2	Nerve - Tibial	G=0.813	T=0.187	0.556444	7.33696e-21
rs11511253	rs9794215	0.967718	0.993407	RP11-291L22.9	ENSG00000276805.2	Skin - Sun Exposed (Lower leg)	C=0.811	T=0.189	0.534383	7.62079e-21
rs11511253	rs10870432	0.954916	0.986815	RP11-291L22.9	ENSG00000276805.2	Skin - Sun Exposed (Lower leg)	G=0.811	A=0.189	0.533386	8.38799e-21
rs11511253	rs200474745	0.974046	0.993415	RP11-291L22.9	ENSG00000276805.2	Nerve - Tibial	CGAATGGAATG=0.812	C=0.188	0.550461	8.45896e-21
rs11511253	rs149200693	0.961177	0.986831	RP11-291L22.9	ENSG00000276805.2	Skin - Sun Exposed (Lower leg)	G=0.812	C=0.188	0.534234	8.53103e-21
rs11511253	rs372035840	0.961177	0.986831	RP11-291L22.9	ENSG00000276805.2	Skin - Sun Exposed (Lower leg)	AC=0.812	A=0.188	0.534234	8.53103e-21
rs11511253	rs10870371	0.961177	0.986831	RP11-291L22.9	ENSG00000276805.2	Skin - Sun Exposed (Lower leg)	G=0.812	A=0.188	0.534234	8.53103e-21
rs11511253	rs11146613	0.993439	1	RP11-291L22.9	ENSG00000276805.2	Skin - Not Sun Exposed (Suprapubic)	C=0.815	T=0.185	0.569575	8.6987e-21
rs11511253	rs61839915	0.980362	0.993396	RP11-291L22.9	ENSG00000276805.2	Skin - Not Sun Exposed (Suprapubic)	C=0.815	T=0.185	0.557561	9.00036e-21
rs11511253	rs7089593	0.980362	0.993396	RP11-291L22.9	ENSG00000276805.2	Skin - Not Sun Exposed (Suprapubic)	A=0.815	G=0.185	0.558005	9.84386e-21
rs11511253	rs7089975	0.980362	0.993396	RP11-291L22.9	ENSG00000276805.2	Skin - Not Sun Exposed (Suprapubic)	A=0.815	G=0.185	0.558005	9.84386e-21
rs11511253	rs2180800	0.980362	0.993396	RP11-291L22.9	ENSG00000276805.2	Skin - Not Sun Exposed (Suprapubic)	C=0.815	T=0.185	0.558005	9.84386e-21
rs11511253	rs11596501	0.986895	1	RP11-291L22.9	ENSG00000276805.2	Skin - Not Sun Exposed (Suprapubic)	G=0.816	A=0.184	0.558005	9.84386e-21
rs11511253	rs11011533	0.986895	1	RP11-291L22.9	ENSG00000276805.2	Nerve - Tibial	G=0.816	A=0.184	0.551935	1.01083e-20
rs11511253	rs10827860	0.986895	1	RP11-291L22.9	ENSG00000276805.2	Nerve - Tibial	G=0.816	A=0.184	0.551935	1.01083e-20
rs11511253	rs10827862	0.986895	1	RP11-291L22.9	ENSG00000276805.2	Nerve - Tibial	C=0.816	A=0.184	0.551935	1.01083e-20
rs11511253	rs7917312	0.986895	1	RP11-291L22.9	ENSG00000276805.2	Nerve - Tibial	C=0.816	T=0.184	0.551935	1.01083e-20
rs11511253	rs2180899	0.728744	1	RP11-291L22.9	ENSG00000276805.2	Nerve - Tibial	G=0.761	A=0.239	0.502747	1.07621e-20
rs11511253	rs11812823	0.986895	1	RP11-291L22.9	ENSG00000276805.2	Skin - Not Sun Exposed (Suprapubic)	T=0.816	C=0.184	0.564588	1.09795e-20
rs11511253	rs112309001	0.986895	1	RP11-291L22.9	ENSG00000276805.2	Skin - Not Sun Exposed (Suprapubic)	AG=0.816	A=0.184	0.564588	1.09795e-20
rs11511253	rs2012084	0.973898	0.986863	RP11-291L22.9	ENSG00000276805.2	Skin - Not Sun Exposed (Suprapubic)	T=0.814	C=0.186	0.564588	1.09795e-20
rs11511253	rs35747454	0.986895	1	RP11-291L22.9	ENSG00000276805.2	Skin - Not Sun Exposed (Suprapubic)	G=0.816	T=0.184	0.564588	1.09795e-20
rs11511253	rs12354584	0.986895	1	RP11-291L22.9	ENSG00000276805.2	Skin - Not Sun Exposed (Suprapubic)	G=0.816	T=0.184	0.564588	1.09795e-20
rs11511253	rs11511148	0.986895	1	RP11-291L22.9	ENSG00000276805.2	Skin - Not Sun Exposed (Suprapubic)	C=0.816	T=0.184	0.564588	1.09795e-20
rs11511253	rs11011567	0.986895	1	RP11-291L22.9	ENSG00000276805.2	Skin - Not Sun Exposed (Suprapubic)	A=0.816	G=0.184	0.564588	1.09795e-20
rs11511253	rs28413086	0.986895	1	RP11-291L22.9	ENSG00000276805.2	Skin - Not Sun Exposed (Suprapubic)	T=0.816	G=0.184	0.564588	1.09795e-20
rs11511253	rs35451472	0.986895	1	RP11-291L22.9	ENSG00000276805.2	Skin - Not Sun Exposed (Suprapubic)	C=0.816	T=0.184	0.564588	1.09795e-20
rs11511253	rs7070930	0.986895	1	RP11-291L22.9	ENSG00000276805.2	Skin - Not Sun Exposed (Suprapubic)	G=0.816	C=0.184	0.564588	1.09795e-20
rs11511253	rs80081575	0.986895	1	RP11-291L22.9	ENSG00000276805.2	Skin - Not Sun Exposed (Suprapubic)	G=0.816	A=0.184	0.564588	1.09795e-20
rs11511253	rs7076118	0.986895	1	RP11-291L22.9	ENSG00000276805.2	Skin - Not Sun Exposed (Suprapubic)	C=0.816	A=0.184	0.564588	1.09795e-20
rs11511253	rs34873071	0.986895	1	RP11-291L22.9	ENSG00000276805.2	Skin - Not Sun Exposed (Suprapubic)	G=0.816	T=0.184	0.564588	1.09795e-20
rs11511253	rs58673518	0.986895	1	RP11-291L22.9	ENSG00000276805.2	Skin - Not Sun Exposed (Suprapubic)	G=0.816	T=0.184	0.564588	1.09795e-20
rs11511253	rs2085430	0.993439	1	RP11-291L22.9	ENSG00000276805.2	Skin - Not Sun Exposed (Suprapubic)	C=0.815	G=0.185	0.564588	1.09795e-20
rs11511253	rs10870459	0.986895	1	RP11-291L22.9	ENSG00000276805.2	Skin - Not Sun Exposed (Suprapubic)	A=0.816	G=0.184	0.564588	1.09795e-20
rs11511253	rs182246855	0.973833	0.99336	RP11-291L22.9	ENSG00000276805.2	Skin - Not Sun Exposed (Suprapubic)	G=0.816	A=0.184	0.564588	1.09795e-20
rs11511253	rs12359136	0.986906	0.993431	RP11-291L22.9	ENSG00000276805.2	Skin - Not Sun Exposed (Suprapubic)	A=0.814	T=0.186	0.564588	1.09795e-20
rs11511253	rs11146640	0.993439	1	RP11-291L22.9	ENSG00000276805.2	Skin - Not Sun Exposed (Suprapubic)	G=0.815	A=0.185	0.564588	1.09795e-20
rs11511253	rs3970136	0.891125	0.993301	RP11-291L22.9	ENSG00000276805.2	Nerve - Tibial	T=0.798	C=0.202	0.525403	1.25971e-20
rs11511253	rs11146675	0.891125	0.993301	RP11-291L22.9	ENSG00000276805.2	Nerve - Tibial	G=0.798	T=0.202	0.525403	1.25971e-20
rs11511253	rs12358135	0.879145	0.986601	RP11-291L22.9	ENSG00000276805.2	Nerve - Tibial	C=0.798	T=0.202	0.525403	1.25971e-20
rs11511253	rs7068733	0.948142	0.973726	RP11-291L22.9	ENSG00000276805.2	Skin - Not Sun Exposed (Suprapubic)	C=0.814	G=0.186	0.550459	1.27888e-20
rs11511253	rs7070930	0.986895	1	RP11-291L22.9	ENSG00000276805.2	Nerve - Tibial	G=0.816	C=0.184	0.553025	1.33465e-20
rs11511253	rs80081575	0.986895	1	RP11-291L22.9	ENSG00000276805.2	Nerve - Tibial	G=0.816	A=0.184	0.553025	1.33465e-20
rs11511253	rs11597330	0.974276	1	RP11-291L22.9	ENSG00000276805.2	Nerve - Tibial	C=0.81	T=0.19	0.545091	1.35108e-20
rs11511253	rs12772118	0.961177	0.986831	RP11-291L22.9	ENSG00000276805.2	Nerve - Tibial	T=0.812	G=0.188	0.551537	1.45133e-20
rs11511253	rs9664979	0.961177	0.986831	RP11-291L22.9	ENSG00000276805.2	Nerve - Tibial	G=0.812	A=0.188	0.551537	1.45133e-20
rs11511253	rs7910228	0.961177	0.986831	RP11-291L22.9	ENSG00000276805.2	Nerve - Tibial	A=0.812	T=0.188	0.551537	1.45133e-20
rs11511253	rs77578626	0.967718	0.993407	RP11-291L22.9	ENSG00000276805.2	Nerve - Tibial	A=0.811	G=0.189	0.53612	1.56804e-20
rs11511253	rs11011542	0.980366	1	RP11-291L22.9	ENSG00000276805.2	Skin - Not Sun Exposed (Suprapubic)	C=0.817	T=0.183	0.562493	1.64682e-20
rs11511253	rs35949805	0.896667	0.993309	RP11-291L22.9	ENSG00000276805.2	Nerve - Tibial	G=0.799	A=0.201	0.529786	1.66461e-20
rs11511253	rs35361303	0.961177	0.986831	RP11-291L22.9	ENSG00000276805.2	Nerve - Tibial	C=0.812	G=0.188	0.549537	1.66904e-20
rs11511253	rs35173665	0.948722	0.986798	RP11-291L22.9	ENSG00000276805.2	Nerve - Tibial	T=0.81	G=0.19	0.549537	1.66904e-20
rs11511253	rs7068771	0.961177	0.986831	RP11-291L22.9	ENSG00000276805.2	Nerve - Tibial	T=0.812	G=0.188	0.549537	1.66904e-20
rs11511253	rs12571507	0.936072	0.980198	RP11-291L22.9	ENSG00000276805.2	Nerve - Tibial	C=0.81	T=0.19	0.549171	1.6829e-20
rs11511253	rs7081059	0.961177	0.986831	RP11-291L22.9	ENSG00000276805.2	Nerve - Tibial	C=0.812	A=0.188	0.551879	1.74757e-20
rs11511253	rs9794215	0.967718	0.993407	RP11-291L22.9	ENSG00000276805.2	Skin - Not Sun Exposed (Suprapubic)	C=0.811	T=0.189	0.560914	1.82091e-20
rs11511253	rs11812823	0.986895	1	RP11-291L22.9	ENSG00000276805.2	Nerve - Tibial	T=0.816	C=0.184	0.554542	1.97608e-20
rs11511253	rs112309001	0.986895	1	RP11-291L22.9	ENSG00000276805.2	Nerve - Tibial	AG=0.816	A=0.184	0.554542	1.97608e-20
rs11511253	rs2012084	0.973898	0.986863	RP11-291L22.9	ENSG00000276805.2	Nerve - Tibial	T=0.814	C=0.186	0.554542	1.97608e-20
rs11511253	rs35747454	0.986895	1	RP11-291L22.9	ENSG00000276805.2	Nerve - Tibial	G=0.816	T=0.184	0.554542	1.97608e-20
rs11511253	rs12354584	0.986895	1	RP11-291L22.9	ENSG00000276805.2	Nerve - Tibial	G=0.816	T=0.184	0.554542	1.97608e-20
rs11511253	rs11511148	0.986895	1	RP11-291L22.9	ENSG00000276805.2	Nerve - Tibial	C=0.816	T=0.184	0.554542	1.97608e-20
rs11511253	rs11011567	0.986895	1	RP11-291L22.9	ENSG00000276805.2	Nerve - Tibial	A=0.816	G=0.184	0.554542	1.97608e-20
rs11511253	rs28413086	0.986895	1	RP11-291L22.9	ENSG00000276805.2	Nerve - Tibial	T=0.816	G=0.184	0.554542	1.97608e-20
rs11511253	rs35451472	0.986895	1	RP11-291L22.9	ENSG00000276805.2	Nerve - Tibial	C=0.816	T=0.184	0.554542	1.97608e-20
rs11511253	rs7076118	0.986895	1	RP11-291L22.9	ENSG00000276805.2	Nerve - Tibial	C=0.816	A=0.184	0.554542	1.97608e-20
rs11511253	rs9794215	0.967718	0.993407	RP11-291L22.9	ENSG00000276805.2	Nerve - Tibial	C=0.811	T=0.189	0.554563	2.08371e-20
rs11511253	rs11146699	0.967718	0.993407	RP11-291L22.9	ENSG00000276805.2	Nerve - Tibial	G=0.811	A=0.189	0.552966	2.17952e-20
rs11511253	rs10870418	0.961177	0.986831	RP11-291L22.9	ENSG00000276805.2	Nerve - Tibial	C=0.812	T=0.188	0.549595	2.21187e-20
rs11511253	rs4881585	0.961177	0.986831	RP11-291L22.9	ENSG00000276805.2	Nerve - Tibial	A=0.812	G=0.188	0.549595	2.21187e-20
rs11511253	rs10870362	0.993466	1	RP11-291L22.9	ENSG00000276805.2	Skin - Not Sun Exposed (Suprapubic)	G=0.813	A=0.187	0.560196	2.3395e-20
rs11511253	rs2310280	0.986895	1	RP11-291L22.9	ENSG00000276805.2	Skin - Not Sun Exposed (Suprapubic)	A=0.816	G=0.184	0.560315	2.98907e-20
rs11511253	rs11146877	0.986895	1	RP11-291L22.9	ENSG00000276805.2	Skin - Not Sun Exposed (Suprapubic)	C=0.816	T=0.184	0.560315	2.98907e-20
rs11511253	rs11146775	0.967718	0.993407	RP11-291L22.9	ENSG00000276805.2	Nerve - Tibial	C=0.811	T=0.189	0.56397	3.00519e-20
rs11511253	rs71500469	0.967718	0.993407	RP11-291L22.9	ENSG00000276805.2	Skin - Not Sun Exposed (Suprapubic)	T=0.811	G=0.189	0.563428	3.37917e-20
rs11511253	rs11146654	0.967718	0.993407	RP11-291L22.9	ENSG00000276805.2	Skin - Not Sun Exposed (Suprapubic)	C=0.811	T=0.189	0.547334	3.56936e-20
rs11511253	rs9731107	0.967718	0.993407	RP11-291L22.9	ENSG00000276805.2	Skin - Not Sun Exposed (Suprapubic)	G=0.811	A=0.189	0.547334	3.56936e-20
rs11511253	rs1902549	0.967718	0.993407	RP11-291L22.9	ENSG00000276805.2	Skin - Not Sun Exposed (Suprapubic)	C=0.811	T=0.189	0.547334	3.56936e-20
rs11511253	rs7071794	0.967718	0.993407	RP11-291L22.9	ENSG00000276805.2	Skin - Not Sun Exposed (Suprapubic)	T=0.811	A=0.189	0.547334	3.56936e-20
rs11511253	rs11146702	0.967718	0.993407	RP11-291L22.9	ENSG00000276805.2	Skin - Not Sun Exposed (Suprapubic)	G=0.811	A=0.189	0.547334	3.56936e-20
rs11511253	rs11146709	0.967718	0.993407	RP11-291L22.9	ENSG00000276805.2	Skin - Not Sun Exposed (Suprapubic)	C=0.811	T=0.189	0.547334	3.56936e-20
rs11511253	rs11597575	0.967718	0.993407	RP11-291L22.9	ENSG00000276805.2	Skin - Not Sun Exposed (Suprapubic)	G=0.811	C=0.189	0.547334	3.56936e-20
rs11511253	rs10870406	0.967718	0.993407	RP11-291L22.9	ENSG00000276805.2	Skin - Not Sun Exposed (Suprapubic)	G=0.811	A=0.189	0.547334	3.56936e-20
rs11511253	rs4881578	0.967718	0.993407	RP11-291L22.9	ENSG00000276805.2	Skin - Not Sun Exposed (Suprapubic)	G=0.811	A=0.189	0.547334	3.56936e-20
rs11511253	rs4881584	0.967718	0.993407	RP11-291L22.9	ENSG00000276805.2	Skin - Not Sun Exposed (Suprapubic)	C=0.811	T=0.189	0.547334	3.56936e-20
rs11511253	rs7099107	0.967718	0.993407	RP11-291L22.9	ENSG00000276805.2	Skin - Not Sun Exposed (Suprapubic)	G=0.811	A=0.189	0.547334	3.56936e-20
rs11511253	rs11146753	0.967718	0.993407	RP11-291L22.9	ENSG00000276805.2	Skin - Not Sun Exposed (Suprapubic)	A=0.811	G=0.189	0.547334	3.56936e-20
rs11511253	rs10870421	0.967718	0.993407	RP11-291L22.9	ENSG00000276805.2	Skin - Not Sun Exposed (Suprapubic)	C=0.811	A=0.189	0.547334	3.56936e-20
rs11511253	rs7074243	0.961456	0.993399	RP11-291L22.9	ENSG00000276805.2	Skin - Not Sun Exposed (Suprapubic)	A=0.81	T=0.19	0.547334	3.56936e-20
rs11511253	rs7068365	0.967718	0.993407	RP11-291L22.9	ENSG00000276805.2	Skin - Not Sun Exposed (Suprapubic)	C=0.811	T=0.189	0.547334	3.56936e-20
rs11511253	rs11146768	0.967718	0.993407	RP11-291L22.9	ENSG00000276805.2	Skin - Not Sun Exposed (Suprapubic)	C=0.811	T=0.189	0.547334	3.56936e-20
rs11511253	rs11146784	0.961456	0.993399	RP11-291L22.9	ENSG00000276805.2	Skin - Not Sun Exposed (Suprapubic)	C=0.81	T=0.19	0.547334	3.56936e-20
rs11511253	rs12357698	0.967718	0.993407	RP11-291L22.9	ENSG00000276805.2	Skin - Not Sun Exposed (Suprapubic)	T=0.811	A=0.189	0.547334	3.56936e-20
rs11511253	rs4556804	0.967718	0.993407	RP11-291L22.9	ENSG00000276805.2	Skin - Not Sun Exposed (Suprapubic)	G=0.811	A=0.189	0.547334	3.56936e-20
rs11511253	rs11011501	0.967321	0.993324	RP11-291L22.9	ENSG00000276805.2	Skin - Not Sun Exposed (Suprapubic)	G=0.817	A=0.183	0.558807	3.84867e-20
rs11511253	rs11011509	0.973833	0.99336	RP11-291L22.9	ENSG00000276805.2	Skin - Not Sun Exposed (Suprapubic)	G=0.816	A=0.184	0.558807	3.84867e-20
rs11511253	rs7100199	0.96737	0.986792	RP11-291L22.9	ENSG00000276805.2	Skin - Not Sun Exposed (Suprapubic)	T=0.815	C=0.185	0.558807	3.84867e-20
rs11511253	rs10764157	0.980366	1	RP11-291L22.9	ENSG00000276805.2	Skin - Not Sun Exposed (Suprapubic)	A=0.817	G=0.183	0.558807	3.84867e-20
rs11511253	rs2021018	0.980366	1	RP11-291L22.9	ENSG00000276805.2	Skin - Not Sun Exposed (Suprapubic)	G=0.817	A=0.183	0.558807	3.84867e-20
rs11511253	rs7071245	0.980366	1	RP11-291L22.9	ENSG00000276805.2	Skin - Not Sun Exposed (Suprapubic)	G=0.817	A=0.183	0.558807	3.84867e-20
rs11511253	rs10827863	0.980366	1	RP11-291L22.9	ENSG00000276805.2	Skin - Not Sun Exposed (Suprapubic)	T=0.817	C=0.183	0.558807	3.84867e-20
rs11511253	rs7089593	0.980362	0.993396	RP11-291L22.9	ENSG00000276805.2	Nerve - Tibial	A=0.815	G=0.185	0.550573	4.3701e-20
rs11511253	rs7089975	0.980362	0.993396	RP11-291L22.9	ENSG00000276805.2	Nerve - Tibial	A=0.815	G=0.185	0.550573	4.3701e-20
rs11511253	rs2180800	0.980362	0.993396	RP11-291L22.9	ENSG00000276805.2	Nerve - Tibial	C=0.815	T=0.185	0.550573	4.3701e-20
rs11511253	rs11596501	0.986895	1	RP11-291L22.9	ENSG00000276805.2	Nerve - Tibial	G=0.816	A=0.184	0.550573	4.3701e-20
rs11511253	rs11146699	0.967718	0.993407	RP11-291L22.9	ENSG00000276805.2	Skin - Not Sun Exposed (Suprapubic)	G=0.811	A=0.189	0.545397	4.51814e-20
rs11511253	rs11146713	0.967718	0.993407	RP11-291L22.9	ENSG00000276805.2	Skin - Not Sun Exposed (Suprapubic)	G=0.811	T=0.189	0.545494	4.72379e-20
rs11511253	rs11011542	0.980366	1	RP11-291L22.9	ENSG00000276805.2	Nerve - Tibial	C=0.817	T=0.183	0.553023	4.87514e-20
rs11511253	rs11146613	0.993439	1	RP11-291L22.9	ENSG00000276805.2	Nerve - Tibial	C=0.815	T=0.185	0.55312	5.12307e-20
rs11511253	rs61837257	0.993439	1	SEPT7P9	ENSG00000120555.13	Artery - Tibial	C=0.815	G=0.185	0.465369	5.39593e-20
rs11511253	rs12773561	0.967718	0.993407	RP11-291L22.9	ENSG00000276805.2	Skin - Not Sun Exposed (Suprapubic)	G=0.811	C=0.189	0.540524	5.5994e-20
rs11511253	rs12775411	0.95526	0.993391	RP11-291L22.9	ENSG00000276805.2	Skin - Not Sun Exposed (Suprapubic)	G=0.809	A=0.191	0.543316	5.73867e-20
rs11511253	rs7089032	0.967718	0.993407	RP11-291L22.9	ENSG00000276805.2	Nerve - Tibial	G=0.811	T=0.189	0.561598	5.9811e-20
rs11511253	rs367919155	0.993439	1	SEPT7P9	ENSG00000120555.13	Artery - Tibial	G=0.815	C=0.185	0.464922	5.98867e-20
rs11511253	rs4088497	0.993466	1	SEPT7P9	ENSG00000120555.13	Artery - Tibial	T=0.813	C=0.187	0.467341	6.57343e-20
rs11511253	rs11146655	0.961177	0.986831	SEPT7P9	ENSG00000120555.13	Artery - Tibial	A=0.812	G=0.188	0.473987	6.95696e-20
rs11511253	rs200253039	0.993439	1	SEPT7P9	ENSG00000120555.13	Artery - Tibial	C=0.815	T=0.185	0.461733	7.50094e-20
rs11511253	rs200474745	0.974046	0.993415	RP11-291L22.9	ENSG00000276805.2	Skin - Not Sun Exposed (Suprapubic)	CGAATGGAATG=0.812	C=0.188	0.545291	8.21868e-20
rs11511253	rs11597330	0.974276	1	RP11-291L22.9	ENSG00000276805.2	Skin - Not Sun Exposed (Suprapubic)	C=0.81	T=0.19	0.543807	8.61312e-20
rs11511253	rs11817950	0.954916	0.986815	RP11-291L22.9	ENSG00000276805.2	Skin - Not Sun Exposed (Suprapubic)	C=0.811	T=0.189	0.538701	8.97782e-20
rs11511253	rs34873071	0.986895	1	RP11-291L22.9	ENSG00000276805.2	Nerve - Tibial	G=0.816	T=0.184	0.545496	9.06536e-20
rs11511253	rs58673518	0.986895	1	RP11-291L22.9	ENSG00000276805.2	Nerve - Tibial	G=0.816	T=0.184	0.545496	9.06536e-20
rs11511253	rs2085430	0.993439	1	RP11-291L22.9	ENSG00000276805.2	Nerve - Tibial	C=0.815	G=0.185	0.545496	9.06536e-20
rs11511253	rs10870459	0.986895	1	RP11-291L22.9	ENSG00000276805.2	Nerve - Tibial	A=0.816	G=0.184	0.545496	9.06536e-20
rs11511253	rs182246855	0.973833	0.99336	RP11-291L22.9	ENSG00000276805.2	Nerve - Tibial	G=0.816	A=0.184	0.545496	9.06536e-20
rs11511253	rs12359136	0.986906	0.993431	RP11-291L22.9	ENSG00000276805.2	Nerve - Tibial	A=0.814	T=0.186	0.545496	9.06536e-20
rs11511253	rs11146640	0.993439	1	RP11-291L22.9	ENSG00000276805.2	Nerve - Tibial	G=0.815	A=0.185	0.545496	9.06536e-20
rs11511253	rs11597330	0.974276	1	SEPT7P9	ENSG00000120555.13	Artery - Tibial	C=0.81	T=0.19	0.456013	9.07981e-20
rs11511253	rs79613030	0.993439	1	SEPT7P9	ENSG00000120555.13	Artery - Tibial	G=0.815	A=0.185	0.461495	9.38004e-20
rs11511253	rs61839484	0.993439	1	SEPT7P9	ENSG00000120555.13	Artery - Tibial	G=0.815	A=0.185	0.461495	9.38004e-20
rs11511253	rs111563184	0.891243	0.947169	RP11-291L22.9	ENSG00000276805.2	Nerve - Tibial	G=0.815	GC=0.185	0.535307	9.62909e-20
rs11511253	rs61839915	0.980362	0.993396	RP11-291L22.9	ENSG00000276805.2	Nerve - Tibial	C=0.815	T=0.185	0.544885	9.75926e-20
rs11511253	rs11011558	0.993439	1	SEPT7P9	ENSG00000120555.13	Artery - Tibial	G=0.815	A=0.185	0.455404	1.00571e-19
rs11511253	rs2310280	0.986895	1	SEPT7P9	ENSG00000120555.13	Artery - Tibial	A=0.816	G=0.184	0.471067	1.05672e-19
rs11511253	rs11146877	0.986895	1	SEPT7P9	ENSG00000120555.13	Artery - Tibial	C=0.816	T=0.184	0.471067	1.05672e-19
rs11511253	rs74798172	0.879145	0.986601	RP11-291L22.9	ENSG00000276805.2	Nerve - Tibial	C=0.798	G=0.202	0.512047	1.37684e-19
rs11511253	rs12772118	0.961177	0.986831	RP11-291L22.9	ENSG00000276805.2	Skin - Not Sun Exposed (Suprapubic)	T=0.812	G=0.188	0.547229	1.45457e-19
rs11511253	rs9664979	0.961177	0.986831	RP11-291L22.9	ENSG00000276805.2	Skin - Not Sun Exposed (Suprapubic)	G=0.812	A=0.188	0.547229	1.45457e-19
rs11511253	rs7910228	0.961177	0.986831	RP11-291L22.9	ENSG00000276805.2	Skin - Not Sun Exposed (Suprapubic)	A=0.812	T=0.188	0.547229	1.45457e-19
rs11511253	rs35361303	0.961177	0.986831	RP11-291L22.9	ENSG00000276805.2	Skin - Not Sun Exposed (Suprapubic)	C=0.812	G=0.188	0.547229	1.45457e-19
rs11511253	rs7081059	0.961177	0.986831	RP11-291L22.9	ENSG00000276805.2	Skin - Not Sun Exposed (Suprapubic)	C=0.812	A=0.188	0.547229	1.45457e-19
rs11511253	rs35173665	0.948722	0.986798	RP11-291L22.9	ENSG00000276805.2	Skin - Not Sun Exposed (Suprapubic)	T=0.81	G=0.19	0.547229	1.45457e-19
rs11511253	rs7068771	0.961177	0.986831	RP11-291L22.9	ENSG00000276805.2	Skin - Not Sun Exposed (Suprapubic)	T=0.812	G=0.188	0.547229	1.45457e-19
rs11511253	rs11146655	0.961177	0.986831	RP11-291L22.9	ENSG00000276805.2	Skin - Not Sun Exposed (Suprapubic)	A=0.812	G=0.188	0.549374	1.47242e-19
rs11511253	rs11511253	1	1	SEPT7P9	ENSG00000120555.13	Artery - Tibial	G=0.814	A=0.186	0.460198	1.48351e-19
rs11511253	rs11595308	1	1	SEPT7P9	ENSG00000120555.13	Artery - Tibial	C=0.814	A=0.186	0.460198	1.48351e-19
rs11511253	rs11146621	0.993466	1	SEPT7P9	ENSG00000120555.13	Artery - Tibial	G=0.813	A=0.187	0.460198	1.48351e-19
rs11511253	rs2310211	0.993466	1	SEPT7P9	ENSG00000120555.13	Artery - Tibial	G=0.813	A=0.187	0.460198	1.48351e-19
rs11511253	rs144280981	0.986906	0.993431	SEPT7P9	ENSG00000120555.13	Artery - Tibial	C=0.814	T=0.186	0.458124	1.50111e-19
rs11511253	rs7093896	0.993439	1	SEPT7P9	ENSG00000120555.13	Artery - Tibial	A=0.815	T=0.185	0.458124	1.50111e-19
rs11511253	rs3087759	0.993439	1	SEPT7P9	ENSG00000120555.13	Artery - Tibial	A=0.815	C=0.185	0.458124	1.50111e-19
rs11511253	rs4934946	0.993439	1	SEPT7P9	ENSG00000120555.13	Artery - Tibial	T=0.815	C=0.185	0.458124	1.50111e-19
rs11511253	rs11011555	0.993439	1	SEPT7P9	ENSG00000120555.13	Artery - Tibial	T=0.815	C=0.185	0.458124	1.50111e-19
rs11511253	rs61837224	0.993439	1	SEPT7P9	ENSG00000120555.13	Artery - Tibial	G=0.815	C=0.185	0.458124	1.50111e-19
rs11511253	rs117398853	0.993439	1	SEPT7P9	ENSG00000120555.13	Artery - Tibial	C=0.815	G=0.185	0.458124	1.50111e-19
rs11511253	rs9663128	0.993439	1	SEPT7P9	ENSG00000120555.13	Artery - Tibial	C=0.815	G=0.185	0.458124	1.50111e-19
rs11511253	rs7088208	0.986906	0.993431	SEPT7P9	ENSG00000120555.13	Artery - Tibial	T=0.814	C=0.186	0.458124	1.50111e-19
rs11511253	rs117840800	0.993439	1	SEPT7P9	ENSG00000120555.13	Artery - Tibial	A=0.815	G=0.185	0.458124	1.50111e-19
rs11511253	rs74890899	0.986895	1	SEPT7P9	ENSG00000120555.13	Artery - Tibial	C=0.816	T=0.184	0.458124	1.50111e-19
rs11511253	rs1810634	0.993439	1	SEPT7P9	ENSG00000120555.13	Artery - Tibial	A=0.815	G=0.185	0.458124	1.50111e-19
rs11511253	rs9664768	0.993439	1	SEPT7P9	ENSG00000120555.13	Artery - Tibial	G=0.815	A=0.185	0.458124	1.50111e-19
rs11511253	rs72639568	0.993439	1	SEPT7P9	ENSG00000120555.13	Artery - Tibial	G=0.815	A=0.185	0.458124	1.50111e-19
rs11511253	rs77114817	0.986895	1	SEPT7P9	ENSG00000120555.13	Artery - Tibial	T=0.816	C=0.184	0.458124	1.50111e-19
rs11511253	rs11492515	0.993439	1	SEPT7P9	ENSG00000120555.13	Artery - Tibial	C=0.815	T=0.185	0.458124	1.50111e-19
rs11511253	rs11492459	0.993439	1	SEPT7P9	ENSG00000120555.13	Artery - Tibial	T=0.815	C=0.185	0.458124	1.50111e-19
rs11511253	rs7084618	0.993439	1	SEPT7P9	ENSG00000120555.13	Artery - Tibial	A=0.815	T=0.185	0.458124	1.50111e-19
rs11511253	rs7095113	0.993439	1	SEPT7P9	ENSG00000120555.13	Artery - Tibial	G=0.815	A=0.185	0.458124	1.50111e-19
rs11511253	rs148773254	0.993439	1	SEPT7P9	ENSG00000120555.13	Artery - Tibial	C=0.815	T=0.185	0.458124	1.50111e-19
rs11511253	rs4623823	0.993439	1	SEPT7P9	ENSG00000120555.13	Artery - Tibial	C=0.815	T=0.185	0.458124	1.50111e-19
rs11511253	rs35712971	0.993439	1	SEPT7P9	ENSG00000120555.13	Artery - Tibial	A=0.815	T=0.185	0.458124	1.50111e-19
rs11511253	rs4572067	0.993439	1	SEPT7P9	ENSG00000120555.13	Artery - Tibial	G=0.815	T=0.185	0.458124	1.50111e-19
rs11511253	rs11146911	1	1	SEPT7P9	ENSG00000120555.13	Artery - Tibial	C=0.814	A=0.186	0.458124	1.50111e-19
rs11511253	rs4881586	0.86621	0.973269	SEPT7P9	ENSG00000120555.13	Artery - Tibial	C=0.8	T=0.2	0.433717	1.80913e-19
rs11511253	rs149200693	0.961177	0.986831	RP11-291L22.9	ENSG00000276805.2	Skin - Not Sun Exposed (Suprapubic)	G=0.812	C=0.188	0.545301	1.82833e-19
rs11511253	rs372035840	0.961177	0.986831	RP11-291L22.9	ENSG00000276805.2	Skin - Not Sun Exposed (Suprapubic)	AC=0.812	A=0.188	0.545301	1.82833e-19
rs11511253	rs10870371	0.961177	0.986831	RP11-291L22.9	ENSG00000276805.2	Skin - Not Sun Exposed (Suprapubic)	G=0.812	A=0.188	0.545301	1.82833e-19
rs11511253	rs36072007	0.961177	0.986831	RP11-291L22.9	ENSG00000276805.2	Skin - Not Sun Exposed (Suprapubic)	T=0.812	TA=0.188	0.545301	1.82833e-19
rs11511253	rs2310280	0.986895	1	RP11-291L22.9	ENSG00000276805.2	Nerve - Tibial	A=0.816	G=0.184	0.542222	2.09841e-19
rs11511253	rs11146877	0.986895	1	RP11-291L22.9	ENSG00000276805.2	Nerve - Tibial	C=0.816	T=0.184	0.542222	2.09841e-19
rs11511253	rs34458842	0.967718	0.993407	SEPT7P9	ENSG00000120555.13	Artery - Tibial	TG=0.811	T=0.189	0.460265	2.78925e-19
rs11511253	rs12772118	0.961177	0.986831	SEPT7P9	ENSG00000120555.13	Artery - Tibial	T=0.812	G=0.188	0.463722	2.7982e-19
rs11511253	rs9664979	0.961177	0.986831	SEPT7P9	ENSG00000120555.13	Artery - Tibial	G=0.812	A=0.188	0.463722	2.7982e-19
rs11511253	rs10870418	0.961177	0.986831	SEPT7P9	ENSG00000120555.13	Artery - Tibial	C=0.812	T=0.188	0.463722	2.7982e-19
rs11511253	rs7910228	0.961177	0.986831	SEPT7P9	ENSG00000120555.13	Artery - Tibial	A=0.812	T=0.188	0.463722	2.7982e-19
rs11511253	rs4881585	0.961177	0.986831	SEPT7P9	ENSG00000120555.13	Artery - Tibial	A=0.812	G=0.188	0.463722	2.7982e-19
rs11511253	rs200220357	0.993439	1	SEPT7P9	ENSG00000120555.13	Artery - Tibial	C=0.815	T=0.185	0.458762	2.89958e-19
rs11511253	rs10870362	0.993466	1	SEPT7P9	ENSG00000120555.13	Artery - Tibial	G=0.813	A=0.187	0.465097	3.06748e-19
rs11511253	rs1902549	0.967718	0.993407	SEPT7P9	ENSG00000120555.13	Artery - Tibial	C=0.811	T=0.189	0.458946	3.35138e-19
rs11511253	rs12775030	0.993439	1	SEPT7P9	ENSG00000120555.13	Artery - Tibial	C=0.815	T=0.185	0.453395	3.45206e-19
rs11511253	rs3928516	0.993466	1	SEPT7P9	ENSG00000120555.13	Artery - Tibial	G=0.813	T=0.187	0.452841	3.63578e-19
rs11511253	rs11812823	0.986895	1	SEPT7P9	ENSG00000120555.13	Artery - Tibial	T=0.816	C=0.184	0.463478	3.89847e-19
rs11511253	rs112309001	0.986895	1	SEPT7P9	ENSG00000120555.13	Artery - Tibial	AG=0.816	A=0.184	0.463478	3.89847e-19
rs11511253	rs2012084	0.973898	0.986863	SEPT7P9	ENSG00000120555.13	Artery - Tibial	T=0.814	C=0.186	0.463478	3.89847e-19
rs11511253	rs35747454	0.986895	1	SEPT7P9	ENSG00000120555.13	Artery - Tibial	G=0.816	T=0.184	0.463478	3.89847e-19
rs11511253	rs12354584	0.986895	1	SEPT7P9	ENSG00000120555.13	Artery - Tibial	G=0.816	T=0.184	0.463478	3.89847e-19
rs11511253	rs11511148	0.986895	1	SEPT7P9	ENSG00000120555.13	Artery - Tibial	C=0.816	T=0.184	0.463478	3.89847e-19
rs11511253	rs11011567	0.986895	1	SEPT7P9	ENSG00000120555.13	Artery - Tibial	A=0.816	G=0.184	0.463478	3.89847e-19
rs11511253	rs28413086	0.986895	1	SEPT7P9	ENSG00000120555.13	Artery - Tibial	T=0.816	G=0.184	0.463478	3.89847e-19
rs11511253	rs35451472	0.986895	1	SEPT7P9	ENSG00000120555.13	Artery - Tibial	C=0.816	T=0.184	0.463478	3.89847e-19
rs11511253	rs7070930	0.986895	1	SEPT7P9	ENSG00000120555.13	Artery - Tibial	G=0.816	C=0.184	0.463478	3.89847e-19
rs11511253	rs80081575	0.986895	1	SEPT7P9	ENSG00000120555.13	Artery - Tibial	G=0.816	A=0.184	0.463478	3.89847e-19
rs11511253	rs34873071	0.986895	1	SEPT7P9	ENSG00000120555.13	Artery - Tibial	G=0.816	T=0.184	0.463478	3.89847e-19
rs11511253	rs58673518	0.986895	1	SEPT7P9	ENSG00000120555.13	Artery - Tibial	G=0.816	T=0.184	0.463478	3.89847e-19
rs11511253	rs2085430	0.993439	1	SEPT7P9	ENSG00000120555.13	Artery - Tibial	C=0.815	G=0.185	0.463478	3.89847e-19
rs11511253	rs10870459	0.986895	1	SEPT7P9	ENSG00000120555.13	Artery - Tibial	A=0.816	G=0.184	0.463478	3.89847e-19
rs11511253	rs182246855	0.973833	0.99336	SEPT7P9	ENSG00000120555.13	Artery - Tibial	G=0.816	A=0.184	0.463478	3.89847e-19
rs11511253	rs12359136	0.986906	0.993431	SEPT7P9	ENSG00000120555.13	Artery - Tibial	A=0.814	T=0.186	0.463478	3.89847e-19
rs11511253	rs11146640	0.993439	1	SEPT7P9	ENSG00000120555.13	Artery - Tibial	G=0.815	A=0.185	0.463478	3.89847e-19
rs11511253	rs11146654	0.967718	0.993407	SEPT7P9	ENSG00000120555.13	Artery - Tibial	C=0.811	T=0.189	0.45595	3.91812e-19
rs11511253	rs9731107	0.967718	0.993407	SEPT7P9	ENSG00000120555.13	Artery - Tibial	G=0.811	A=0.189	0.45595	3.91812e-19
rs11511253	rs7071794	0.967718	0.993407	SEPT7P9	ENSG00000120555.13	Artery - Tibial	T=0.811	A=0.189	0.45595	3.91812e-19
rs11511253	rs11146702	0.967718	0.993407	SEPT7P9	ENSG00000120555.13	Artery - Tibial	G=0.811	A=0.189	0.45595	3.91812e-19
rs11511253	rs11146709	0.967718	0.993407	SEPT7P9	ENSG00000120555.13	Artery - Tibial	C=0.811	T=0.189	0.45595	3.91812e-19
rs11511253	rs11146713	0.967718	0.993407	SEPT7P9	ENSG00000120555.13	Artery - Tibial	G=0.811	T=0.189	0.45595	3.91812e-19
rs11511253	rs11597575	0.967718	0.993407	SEPT7P9	ENSG00000120555.13	Artery - Tibial	G=0.811	C=0.189	0.45595	3.91812e-19
rs11511253	rs10870406	0.967718	0.993407	SEPT7P9	ENSG00000120555.13	Artery - Tibial	G=0.811	A=0.189	0.45595	3.91812e-19
rs11511253	rs4881578	0.967718	0.993407	SEPT7P9	ENSG00000120555.13	Artery - Tibial	G=0.811	A=0.189	0.45595	3.91812e-19
rs11511253	rs4881584	0.967718	0.993407	SEPT7P9	ENSG00000120555.13	Artery - Tibial	C=0.811	T=0.189	0.45595	3.91812e-19
rs11511253	rs11146753	0.967718	0.993407	SEPT7P9	ENSG00000120555.13	Artery - Tibial	A=0.811	G=0.189	0.45595	3.91812e-19
rs11511253	rs10870421	0.967718	0.993407	SEPT7P9	ENSG00000120555.13	Artery - Tibial	C=0.811	A=0.189	0.45595	3.91812e-19
rs11511253	rs12773561	0.967718	0.993407	SEPT7P9	ENSG00000120555.13	Artery - Tibial	G=0.811	C=0.189	0.45595	3.91812e-19
rs11511253	rs11146784	0.961456	0.993399	SEPT7P9	ENSG00000120555.13	Artery - Tibial	C=0.81	T=0.19	0.45595	3.91812e-19
rs11511253	rs12357698	0.967718	0.993407	SEPT7P9	ENSG00000120555.13	Artery - Tibial	T=0.811	A=0.189	0.45595	3.91812e-19
rs11511253	rs4556804	0.967718	0.993407	SEPT7P9	ENSG00000120555.13	Artery - Tibial	G=0.811	A=0.189	0.45595	3.91812e-19
rs11511253	rs35361303	0.961177	0.986831	SEPT7P9	ENSG00000120555.13	Artery - Tibial	C=0.812	G=0.188	0.459885	3.95505e-19
rs11511253	rs35173665	0.948722	0.986798	SEPT7P9	ENSG00000120555.13	Artery - Tibial	T=0.81	G=0.19	0.459885	3.95505e-19
rs11511253	rs7068771	0.961177	0.986831	SEPT7P9	ENSG00000120555.13	Artery - Tibial	T=0.812	G=0.188	0.459885	3.95505e-19
rs11511253	rs11592779	0.872669	0.979927	SEPT7P9	ENSG00000120555.13	Artery - Tibial	C=0.799	T=0.201	0.427795	4.17011e-19
rs11511253	rs7923903	0.879145	0.986601	SEPT7P9	ENSG00000120555.13	Artery - Tibial	G=0.798	A=0.202	0.427795	4.17011e-19
rs11511253	rs7896006	0.879145	0.986601	SEPT7P9	ENSG00000120555.13	Artery - Tibial	C=0.798	T=0.202	0.427795	4.17011e-19
rs11511253	rs7896545	0.879145	0.986601	SEPT7P9	ENSG00000120555.13	Artery - Tibial	C=0.798	T=0.202	0.427795	4.17011e-19
rs11511253	rs7076099	0.879145	0.986601	SEPT7P9	ENSG00000120555.13	Artery - Tibial	G=0.798	A=0.202	0.427795	4.17011e-19
rs11511253	rs34458842	0.967718	0.993407	RP11-291L22.9	ENSG00000276805.2	Skin - Not Sun Exposed (Suprapubic)	TG=0.811	T=0.189	0.537222	4.20617e-19
rs11511253	rs11146894	0.986895	1	SEPT7P9	ENSG00000120555.13	Artery - Tibial	G=0.816	A=0.184	0.455968	4.2352e-19
rs11511253	rs10870418	0.961177	0.986831	RP11-291L22.9	ENSG00000276805.2	Skin - Not Sun Exposed (Suprapubic)	C=0.812	T=0.188	0.540143	4.25816e-19
rs11511253	rs4881585	0.961177	0.986831	RP11-291L22.9	ENSG00000276805.2	Skin - Not Sun Exposed (Suprapubic)	A=0.812	G=0.188	0.540143	4.25816e-19
rs11511253	rs61840410	0.891125	0.993301	SEPT7P9	ENSG00000120555.13	Artery - Tibial	C=0.798	T=0.202	0.430523	4.37471e-19
rs11511253	rs10764162	0.616859	0.98546	RP11-291L22.9	ENSG00000276805.2	Skin - Not Sun Exposed (Suprapubic)	C=0.736	T=0.264	0.503438	4.37614e-19
rs11511253	rs11146613	0.993439	1	SEPT7P9	ENSG00000120555.13	Artery - Tibial	C=0.815	T=0.185	0.46561	4.42832e-19
rs11511253	rs7076118	0.986895	1	SEPT7P9	ENSG00000120555.13	Artery - Tibial	C=0.816	A=0.184	0.459409	4.96079e-19
rs11511253	rs149200693	0.961177	0.986831	RP11-291L22.9	ENSG00000276805.2	Nerve - Tibial	G=0.812	C=0.188	0.536592	5.01723e-19
rs11511253	rs372035840	0.961177	0.986831	RP11-291L22.9	ENSG00000276805.2	Nerve - Tibial	AC=0.812	A=0.188	0.536592	5.01723e-19
rs11511253	rs10870371	0.961177	0.986831	RP11-291L22.9	ENSG00000276805.2	Nerve - Tibial	G=0.812	A=0.188	0.536592	5.01723e-19
rs11511253	rs10870432	0.954916	0.986815	RP11-291L22.9	ENSG00000276805.2	Skin - Not Sun Exposed (Suprapubic)	G=0.811	A=0.189	0.538312	5.29044e-19
rs11511253	rs7074243	0.961456	0.993399	SEPT7P9	ENSG00000120555.13	Artery - Tibial	A=0.81	T=0.19	0.452352	5.43047e-19
rs11511253	rs11817950	0.954916	0.986815	SEPT7P9	ENSG00000120555.13	Artery - Tibial	C=0.811	T=0.189	0.452352	5.43047e-19
rs11511253	rs11146768	0.967718	0.993407	SEPT7P9	ENSG00000120555.13	Artery - Tibial	C=0.811	T=0.189	0.452352	5.43047e-19
rs11511253	rs36072007	0.961177	0.986831	RP11-291L22.9	ENSG00000276805.2	Nerve - Tibial	T=0.812	TA=0.188	0.534737	5.64854e-19
rs11511253	rs7095128	0.993439	1	SEPT7P9	ENSG00000120555.13	Artery - Tibial	G=0.815	C=0.185	0.455233	5.67986e-19
rs11511253	rs11146869	0.993439	1	SEPT7P9	ENSG00000120555.13	Artery - Tibial	A=0.815	G=0.185	0.455233	5.67986e-19
rs11511253	rs61839284	0.993439	1	SEPT7P9	ENSG00000120555.13	Artery - Tibial	A=0.815	C=0.185	0.455233	5.67986e-19
rs11511253	rs34019437	0.993439	1	SEPT7P9	ENSG00000120555.13	Artery - Tibial	C=0.815	T=0.185	0.455233	5.67986e-19
rs11511253	rs4326715	0.993466	1	SEPT7P9	ENSG00000120555.13	Artery - Tibial	A=0.813	G=0.187	0.455233	5.67986e-19
rs11511253	rs2310210	0.980362	0.993396	SEPT7P9	ENSG00000120555.13	Artery - Tibial	G=0.815	A=0.185	0.455233	5.67986e-19
rs11511253	rs7068733	0.948142	0.973726	SEPT7P9	ENSG00000120555.13	Artery - Tibial	C=0.814	G=0.186	0.450896	6.15431e-19
rs11511253	rs4881618	0.993466	1	SEPT7P9	ENSG00000120555.13	Artery - Tibial	G=0.813	T=0.187	0.452137	6.32468e-19
rs11511253	rs71500456	0.967718	0.993407	RP11-291L22.9	ENSG00000276805.2	Nerve - Tibial	C=0.811	T=0.189	0.56389	6.34958e-19
rs11511253	rs7087510	0.891125	0.993301	SEPT7P9	ENSG00000120555.13	Artery - Tibial	G=0.798	A=0.202	0.425922	6.8048e-19
rs11511253	rs138310998	0.891125	0.993301	SEPT7P9	ENSG00000120555.13	Artery - Tibial	G=0.798	A=0.202	0.425922	6.8048e-19
rs11511253	rs4070543	0.891125	0.993301	SEPT7P9	ENSG00000120555.13	Artery - Tibial	G=0.798	A=0.202	0.425922	6.8048e-19
rs11511253	rs12571329	0.891125	0.993301	SEPT7P9	ENSG00000120555.13	Artery - Tibial	G=0.798	A=0.202	0.425922	6.8048e-19
rs11511253	rs7069025	0.891125	0.993301	SEPT7P9	ENSG00000120555.13	Artery - Tibial	G=0.798	A=0.202	0.425922	6.8048e-19
rs11511253	rs12770432	0.891125	0.993301	SEPT7P9	ENSG00000120555.13	Artery - Tibial	G=0.798	A=0.202	0.425922	6.8048e-19
rs11511253	rs11011543	0.986895	1	SEPT7P9	ENSG00000120555.13	Artery - Tibial	A=0.816	T=0.184	0.450967	7.00137e-19
rs11511253	rs10827866	0.986895	1	SEPT7P9	ENSG00000120555.13	Artery - Tibial	G=0.816	T=0.184	0.450967	7.00137e-19
rs11511253	rs66610970	0.986895	1	SEPT7P9	ENSG00000120555.13	Artery - Tibial	CT=0.816	C=0.184	0.450967	7.00137e-19
rs11511253	rs138284504	0.986895	1	SEPT7P9	ENSG00000120555.13	Artery - Tibial	C=0.816	T=0.184	0.450967	7.00137e-19
rs11511253	rs10827867	0.986895	1	SEPT7P9	ENSG00000120555.13	Artery - Tibial	T=0.816	C=0.184	0.450967	7.00137e-19
rs11511253	rs12775411	0.95526	0.993391	SEPT7P9	ENSG00000120555.13	Artery - Tibial	G=0.809	A=0.191	0.449111	7.12906e-19
rs11511253	rs71500456	0.967718	0.993407	RP11-291L22.9	ENSG00000276805.2	Skin - Not Sun Exposed (Suprapubic)	C=0.811	T=0.189	0.553118	7.99845e-19
rs11511253	rs7081059	0.961177	0.986831	SEPT7P9	ENSG00000120555.13	Artery - Tibial	C=0.812	A=0.188	0.455554	8.6476e-19
rs11511253	rs10870432	0.954916	0.986815	RP11-291L22.9	ENSG00000276805.2	Nerve - Tibial	G=0.811	A=0.189	0.532457	8.65889e-19
rs11511253	rs11011501	0.967321	0.993324	RP11-291L22.9	ENSG00000276805.2	Nerve - Tibial	G=0.817	A=0.183	0.535074	9.09071e-19
rs11511253	rs11011509	0.973833	0.99336	RP11-291L22.9	ENSG00000276805.2	Nerve - Tibial	G=0.816	A=0.184	0.535074	9.09071e-19
rs11511253	rs7100199	0.96737	0.986792	RP11-291L22.9	ENSG00000276805.2	Nerve - Tibial	T=0.815	C=0.185	0.535074	9.09071e-19
rs11511253	rs10764157	0.980366	1	RP11-291L22.9	ENSG00000276805.2	Nerve - Tibial	A=0.817	G=0.183	0.535074	9.09071e-19
rs11511253	rs2021018	0.980366	1	RP11-291L22.9	ENSG00000276805.2	Nerve - Tibial	G=0.817	A=0.183	0.535074	9.09071e-19
rs11511253	rs7071245	0.980366	1	RP11-291L22.9	ENSG00000276805.2	Nerve - Tibial	G=0.817	A=0.183	0.535074	9.09071e-19
rs11511253	rs10827863	0.980366	1	RP11-291L22.9	ENSG00000276805.2	Nerve - Tibial	T=0.817	C=0.183	0.535074	9.09071e-19
rs11511253	rs200474745	0.974046	0.993415	SEPT7P9	ENSG00000120555.13	Artery - Tibial	CGAATGGAATG=0.812	C=0.188	0.452765	1.03971e-18
rs11511253	rs7099107	0.967718	0.993407	SEPT7P9	ENSG00000120555.13	Artery - Tibial	G=0.811	A=0.189	0.450697	1.04847e-18
rs11511253	rs149200693	0.961177	0.986831	SEPT7P9	ENSG00000120555.13	Artery - Tibial	G=0.812	C=0.188	0.458789	1.06101e-18
rs11511253	rs372035840	0.961177	0.986831	SEPT7P9	ENSG00000120555.13	Artery - Tibial	AC=0.812	A=0.188	0.458789	1.06101e-18
rs11511253	rs10870371	0.961177	0.986831	SEPT7P9	ENSG00000120555.13	Artery - Tibial	G=0.812	A=0.188	0.458789	1.06101e-18
rs11511253	rs7068365	0.967718	0.993407	SEPT7P9	ENSG00000120555.13	Artery - Tibial	C=0.811	T=0.189	0.448053	1.18001e-18
rs11511253	rs71500469	0.967718	0.993407	SEPT7P9	ENSG00000120555.13	Artery - Tibial	T=0.811	G=0.189	0.465583	1.23905e-18
rs11511253	rs111563184	0.891243	0.947169	SEPT7P9	ENSG00000120555.13	Artery - Tibial	G=0.815	GC=0.185	0.440627	1.40969e-18
rs11511253	rs11011542	0.980366	1	SEPT7P9	ENSG00000120555.13	Artery - Tibial	C=0.817	T=0.183	0.458462	1.46647e-18
rs11511253	rs36072007	0.961177	0.986831	SEPT7P9	ENSG00000120555.13	Artery - Tibial	T=0.812	TA=0.188	0.454866	1.49863e-18
rs11511253	rs10870432	0.954916	0.986815	SEPT7P9	ENSG00000120555.13	Artery - Tibial	G=0.811	A=0.189	0.454866	1.49863e-18
rs11511253	rs11146699	0.967718	0.993407	SEPT7P9	ENSG00000120555.13	Artery - Tibial	G=0.811	A=0.189	0.450709	1.51106e-18
rs11511253	rs11011533	0.986895	1	SEPT7P9	ENSG00000120555.13	Artery - Tibial	G=0.816	A=0.184	0.447273	1.51455e-18
rs11511253	rs10827860	0.986895	1	SEPT7P9	ENSG00000120555.13	Artery - Tibial	G=0.816	A=0.184	0.447273	1.51455e-18
rs11511253	rs10827862	0.986895	1	SEPT7P9	ENSG00000120555.13	Artery - Tibial	C=0.816	A=0.184	0.447273	1.51455e-18
rs11511253	rs7917312	0.986895	1	SEPT7P9	ENSG00000120555.13	Artery - Tibial	C=0.816	T=0.184	0.447273	1.51455e-18
rs11511253	rs12571507	0.936072	0.980198	SEPT7P9	ENSG00000120555.13	Artery - Tibial	C=0.81	T=0.19	0.445658	1.65484e-18
rs11511253	rs12570560	0.891125	0.993301	SEPT7P9	ENSG00000120555.13	Artery - Tibial	C=0.798	G=0.202	0.421011	1.97034e-18
rs11511253	rs11011546	0.986895	1	SEPT7P9	ENSG00000120555.13	Artery - Tibial	G=0.816	A=0.184	0.450342	2.08545e-18
rs11511253	rs9794215	0.967718	0.993407	SEPT7P9	ENSG00000120555.13	Artery - Tibial	C=0.811	T=0.189	0.453578	2.41179e-18
rs11511253	rs77578626	0.967718	0.993407	SEPT7P9	ENSG00000120555.13	Artery - Tibial	A=0.811	G=0.189	0.436288	2.52412e-18
rs11511253	rs11011558	0.993439	1	RP11-291L22.9	ENSG00000276805.2	Adipose - Subcutaneous	G=0.815	A=0.185	0.482514	2.53947e-18
rs11511253	rs10764162	0.616859	0.98546	RP11-291L22.9	ENSG00000276805.2	Nerve - Tibial	C=0.736	T=0.264	0.482491	2.63801e-18
rs11511253	rs7089032	0.967718	0.993407	RP11-291L22.9	ENSG00000276805.2	Skin - Not Sun Exposed (Suprapubic)	G=0.811	T=0.189	0.545498	2.72598e-18
rs11511253	rs11011501	0.967321	0.993324	SEPT7P9	ENSG00000120555.13	Artery - Tibial	G=0.817	A=0.183	0.454433	3.24845e-18
rs11511253	rs11011509	0.973833	0.99336	SEPT7P9	ENSG00000120555.13	Artery - Tibial	G=0.816	A=0.184	0.454433	3.24845e-18
rs11511253	rs7100199	0.96737	0.986792	SEPT7P9	ENSG00000120555.13	Artery - Tibial	T=0.815	C=0.185	0.454433	3.24845e-18
rs11511253	rs10764157	0.980366	1	SEPT7P9	ENSG00000120555.13	Artery - Tibial	A=0.817	G=0.183	0.454433	3.24845e-18
rs11511253	rs2021018	0.980366	1	SEPT7P9	ENSG00000120555.13	Artery - Tibial	G=0.817	A=0.183	0.454433	3.24845e-18
rs11511253	rs7071245	0.980366	1	SEPT7P9	ENSG00000120555.13	Artery - Tibial	G=0.817	A=0.183	0.454433	3.24845e-18
rs11511253	rs10827863	0.980366	1	SEPT7P9	ENSG00000120555.13	Artery - Tibial	T=0.817	C=0.183	0.454433	3.24845e-18
rs11511253	rs71500456	0.967718	0.993407	SEPT7P9	ENSG00000120555.13	Artery - Tibial	C=0.811	T=0.189	0.46177	4.29446e-18
rs11511253	rs11146775	0.967718	0.993407	SEPT7P9	ENSG00000120555.13	Artery - Tibial	C=0.811	T=0.189	0.453543	4.4779e-18
rs11511253	rs61839915	0.980362	0.993396	SEPT7P9	ENSG00000120555.13	Artery - Tibial	C=0.815	T=0.185	0.446427	4.54858e-18
rs11511253	rs7089593	0.980362	0.993396	SEPT7P9	ENSG00000120555.13	Artery - Tibial	A=0.815	G=0.185	0.446427	4.54858e-18
rs11511253	rs7089975	0.980362	0.993396	SEPT7P9	ENSG00000120555.13	Artery - Tibial	A=0.815	G=0.185	0.446427	4.54858e-18
rs11511253	rs11596501	0.986895	1	SEPT7P9	ENSG00000120555.13	Artery - Tibial	G=0.816	A=0.184	0.446427	4.54858e-18
rs11511253	rs35949805	0.896667	0.993309	SEPT7P9	ENSG00000120555.13	Artery - Tibial	G=0.799	A=0.201	0.428992	4.57181e-18
rs11511253	rs12775895	0.607434	0.985401	RP11-291L22.9	ENSG00000276805.2	Skin - Sun Exposed (Lower leg)	G=0.733	A=0.267	0.460291	5.34778e-18
rs11511253	rs74798172	0.879145	0.986601	SEPT7P9	ENSG00000120555.13	Artery - Tibial	C=0.798	G=0.202	0.425748	5.88716e-18
rs11511253	rs11146775	0.967718	0.993407	RP11-291L22.9	ENSG00000276805.2	Skin - Not Sun Exposed (Suprapubic)	C=0.811	T=0.189	0.535851	6.62981e-18
rs11511253	rs4088497	0.993466	1	RP11-291L22.9	ENSG00000276805.2	Adipose - Subcutaneous	T=0.813	C=0.187	0.484207	6.69078e-18
rs11511253	rs200253039	0.993439	1	RP11-291L22.9	ENSG00000276805.2	Adipose - Subcutaneous	C=0.815	T=0.185	0.479241	6.83643e-18
rs11511253	rs144280981	0.986906	0.993431	RP11-291L22.9	ENSG00000276805.2	Adipose - Subcutaneous	C=0.814	T=0.186	0.478449	7.9235e-18
rs11511253	rs7093896	0.993439	1	RP11-291L22.9	ENSG00000276805.2	Adipose - Subcutaneous	A=0.815	T=0.185	0.478449	7.9235e-18
rs11511253	rs3087759	0.993439	1	RP11-291L22.9	ENSG00000276805.2	Adipose - Subcutaneous	A=0.815	C=0.185	0.478449	7.9235e-18
rs11511253	rs4934946	0.993439	1	RP11-291L22.9	ENSG00000276805.2	Adipose - Subcutaneous	T=0.815	C=0.185	0.478449	7.9235e-18
rs11511253	rs11011555	0.993439	1	RP11-291L22.9	ENSG00000276805.2	Adipose - Subcutaneous	T=0.815	C=0.185	0.478449	7.9235e-18
rs11511253	rs61837224	0.993439	1	RP11-291L22.9	ENSG00000276805.2	Adipose - Subcutaneous	G=0.815	C=0.185	0.478449	7.9235e-18
rs11511253	rs117398853	0.993439	1	RP11-291L22.9	ENSG00000276805.2	Adipose - Subcutaneous	C=0.815	G=0.185	0.478449	7.9235e-18
rs11511253	rs9663128	0.993439	1	RP11-291L22.9	ENSG00000276805.2	Adipose - Subcutaneous	C=0.815	G=0.185	0.478449	7.9235e-18
rs11511253	rs7088208	0.986906	0.993431	RP11-291L22.9	ENSG00000276805.2	Adipose - Subcutaneous	T=0.814	C=0.186	0.478449	7.9235e-18
rs11511253	rs117840800	0.993439	1	RP11-291L22.9	ENSG00000276805.2	Adipose - Subcutaneous	A=0.815	G=0.185	0.478449	7.9235e-18
rs11511253	rs74890899	0.986895	1	RP11-291L22.9	ENSG00000276805.2	Adipose - Subcutaneous	C=0.816	T=0.184	0.478449	7.9235e-18
rs11511253	rs1810634	0.993439	1	RP11-291L22.9	ENSG00000276805.2	Adipose - Subcutaneous	A=0.815	G=0.185	0.478449	7.9235e-18
rs11511253	rs9664768	0.993439	1	RP11-291L22.9	ENSG00000276805.2	Adipose - Subcutaneous	G=0.815	A=0.185	0.478449	7.9235e-18
rs11511253	rs72639568	0.993439	1	RP11-291L22.9	ENSG00000276805.2	Adipose - Subcutaneous	G=0.815	A=0.185	0.478449	7.9235e-18
rs11511253	rs77114817	0.986895	1	RP11-291L22.9	ENSG00000276805.2	Adipose - Subcutaneous	T=0.816	C=0.184	0.478449	7.9235e-18
rs11511253	rs11492515	0.993439	1	RP11-291L22.9	ENSG00000276805.2	Adipose - Subcutaneous	C=0.815	T=0.185	0.478449	7.9235e-18
rs11511253	rs11492459	0.993439	1	RP11-291L22.9	ENSG00000276805.2	Adipose - Subcutaneous	T=0.815	C=0.185	0.478449	7.9235e-18
rs11511253	rs7084618	0.993439	1	RP11-291L22.9	ENSG00000276805.2	Adipose - Subcutaneous	A=0.815	T=0.185	0.478449	7.9235e-18
rs11511253	rs7095113	0.993439	1	RP11-291L22.9	ENSG00000276805.2	Adipose - Subcutaneous	G=0.815	A=0.185	0.478449	7.9235e-18
rs11511253	rs148773254	0.993439	1	RP11-291L22.9	ENSG00000276805.2	Adipose - Subcutaneous	C=0.815	T=0.185	0.478449	7.9235e-18
rs11511253	rs4623823	0.993439	1	RP11-291L22.9	ENSG00000276805.2	Adipose - Subcutaneous	C=0.815	T=0.185	0.478449	7.9235e-18
rs11511253	rs11146894	0.986895	1	RP11-291L22.9	ENSG00000276805.2	Adipose - Subcutaneous	G=0.816	A=0.184	0.478449	7.9235e-18
rs11511253	rs4572067	0.993439	1	RP11-291L22.9	ENSG00000276805.2	Adipose - Subcutaneous	G=0.815	T=0.185	0.478449	7.9235e-18
rs11511253	rs11146911	1	1	RP11-291L22.9	ENSG00000276805.2	Adipose - Subcutaneous	C=0.814	A=0.186	0.478449	7.9235e-18
rs11511253	rs11011543	0.986895	1	RP11-291L22.9	ENSG00000276805.2	Adipose - Subcutaneous	A=0.816	T=0.184	0.478025	8.4221e-18
rs11511253	rs10827866	0.986895	1	RP11-291L22.9	ENSG00000276805.2	Adipose - Subcutaneous	G=0.816	T=0.184	0.478025	8.4221e-18
rs11511253	rs66610970	0.986895	1	RP11-291L22.9	ENSG00000276805.2	Adipose - Subcutaneous	CT=0.816	C=0.184	0.478025	8.4221e-18
rs11511253	rs138284504	0.986895	1	RP11-291L22.9	ENSG00000276805.2	Adipose - Subcutaneous	C=0.816	T=0.184	0.478025	8.4221e-18
rs11511253	rs10827867	0.986895	1	RP11-291L22.9	ENSG00000276805.2	Adipose - Subcutaneous	T=0.816	C=0.184	0.478025	8.4221e-18
rs11511253	rs12358135	0.879145	0.986601	SEPT7P9	ENSG00000120555.13	Artery - Tibial	C=0.798	T=0.202	0.418884	8.60785e-18
rs11511253	rs2180800	0.980362	0.993396	SEPT7P9	ENSG00000120555.13	Artery - Tibial	C=0.815	T=0.185	0.440996	9.31667e-18
rs11511253	rs3928516	0.993466	1	RP11-291L22.9	ENSG00000276805.2	Adipose - Subcutaneous	G=0.813	T=0.187	0.473349	9.36553e-18
rs11511253	rs61837257	0.993439	1	RP11-291L22.9	ENSG00000276805.2	Adipose - Subcutaneous	C=0.815	G=0.185	0.479054	1.28033e-17
rs11511253	rs3970136	0.891125	0.993301	SEPT7P9	ENSG00000120555.13	Artery - Tibial	T=0.798	C=0.202	0.416785	1.40564e-17
rs11511253	rs11146675	0.891125	0.993301	SEPT7P9	ENSG00000120555.13	Artery - Tibial	G=0.798	T=0.202	0.416785	1.40564e-17
rs11511253	rs367919155	0.993439	1	RP11-291L22.9	ENSG00000276805.2	Adipose - Subcutaneous	G=0.815	C=0.185	0.474332	1.41634e-17
rs11511253	rs11511253	1	1	RP11-291L22.9	ENSG00000276805.2	Adipose - Subcutaneous	G=0.814	A=0.186	0.474332	1.41634e-17
rs11511253	rs11595308	1	1	RP11-291L22.9	ENSG00000276805.2	Adipose - Subcutaneous	C=0.814	A=0.186	0.474332	1.41634e-17
rs11511253	rs11146621	0.993466	1	RP11-291L22.9	ENSG00000276805.2	Adipose - Subcutaneous	G=0.813	A=0.187	0.474332	1.41634e-17
rs11511253	rs2310211	0.993466	1	RP11-291L22.9	ENSG00000276805.2	Adipose - Subcutaneous	G=0.813	A=0.187	0.474332	1.41634e-17
rs11511253	rs12775030	0.993439	1	RP11-291L22.9	ENSG00000276805.2	Adipose - Subcutaneous	C=0.815	T=0.185	0.473177	1.72293e-17
rs11511253	rs2180899	0.728744	1	SEPT7P9	ENSG00000120555.13	Artery - Tibial	G=0.761	A=0.239	0.399467	1.78827e-17
rs11511253	rs35712971	0.993439	1	RP11-291L22.9	ENSG00000276805.2	Adipose - Subcutaneous	A=0.815	T=0.185	0.472124	2.32904e-17
rs11511253	rs79613030	0.993439	1	RP11-291L22.9	ENSG00000276805.2	Adipose - Subcutaneous	G=0.815	A=0.185	0.471084	2.74102e-17
rs11511253	rs61839484	0.993439	1	RP11-291L22.9	ENSG00000276805.2	Adipose - Subcutaneous	G=0.815	A=0.185	0.471084	2.74102e-17
rs11511253	rs11011533	0.986895	1	RP11-291L22.9	ENSG00000276805.2	Adipose - Subcutaneous	G=0.816	A=0.184	0.469836	3.66022e-17
rs11511253	rs10827860	0.986895	1	RP11-291L22.9	ENSG00000276805.2	Adipose - Subcutaneous	G=0.816	A=0.184	0.469836	3.66022e-17
rs11511253	rs10827862	0.986895	1	RP11-291L22.9	ENSG00000276805.2	Adipose - Subcutaneous	C=0.816	A=0.184	0.469836	3.66022e-17
rs11511253	rs7917312	0.986895	1	RP11-291L22.9	ENSG00000276805.2	Adipose - Subcutaneous	C=0.816	T=0.184	0.469836	3.66022e-17
rs11511253	rs11592779	0.872669	0.979927	RP11-291L22.9	ENSG00000276805.2	Adipose - Subcutaneous	C=0.799	T=0.201	0.43698	3.97492e-17
rs11511253	rs7923903	0.879145	0.986601	RP11-291L22.9	ENSG00000276805.2	Adipose - Subcutaneous	G=0.798	A=0.202	0.43698	3.97492e-17
rs11511253	rs7896006	0.879145	0.986601	RP11-291L22.9	ENSG00000276805.2	Adipose - Subcutaneous	C=0.798	T=0.202	0.43698	3.97492e-17
rs11511253	rs7896545	0.879145	0.986601	RP11-291L22.9	ENSG00000276805.2	Adipose - Subcutaneous	C=0.798	T=0.202	0.43698	3.97492e-17
rs11511253	rs7076099	0.879145	0.986601	RP11-291L22.9	ENSG00000276805.2	Adipose - Subcutaneous	G=0.798	A=0.202	0.43698	3.97492e-17
rs11511253	rs111563184	0.891243	0.947169	HSD17B7P2	ENSG00000099251.14	Whole Blood	G=0.815	GC=0.185	0.355679	4.19373e-17
rs11511253	rs12775895	0.607434	0.985401	RP11-291L22.9	ENSG00000276805.2	Skin - Not Sun Exposed (Suprapubic)	G=0.733	A=0.267	0.48203	4.86567e-17
rs11511253	rs7089032	0.967718	0.993407	SEPT7P9	ENSG00000120555.13	Artery - Tibial	G=0.811	T=0.189	0.439453	5.03792e-17
rs11511253	rs4881586	0.86621	0.973269	RP11-291L22.9	ENSG00000276805.2	Adipose - Subcutaneous	C=0.8	T=0.2	0.437523	6.13938e-17
rs11511253	rs12570560	0.891125	0.993301	RP11-291L22.9	ENSG00000276805.2	Adipose - Subcutaneous	C=0.798	G=0.202	0.43394	7.52296e-17
rs11511253	rs11597330	0.974276	1	HSD17B7P2	ENSG00000099251.14	Whole Blood	C=0.81	T=0.19	0.355176	7.57225e-17
rs11511253	rs2180899	0.728744	1	RP11-291L22.9	ENSG00000276805.2	Artery - Tibial	G=0.761	A=0.239	0.428614	7.7589e-17
rs11511253	rs7068733	0.948142	0.973726	RP11-291L22.9	ENSG00000276805.2	Adipose - Subcutaneous	C=0.814	G=0.186	0.460511	1.08818e-16
rs11511253	rs7087510	0.891125	0.993301	RP11-291L22.9	ENSG00000276805.2	Adipose - Subcutaneous	G=0.798	A=0.202	0.431086	1.14803e-16
rs11511253	rs138310998	0.891125	0.993301	RP11-291L22.9	ENSG00000276805.2	Adipose - Subcutaneous	G=0.798	A=0.202	0.431086	1.14803e-16
rs11511253	rs12571329	0.891125	0.993301	RP11-291L22.9	ENSG00000276805.2	Adipose - Subcutaneous	G=0.798	A=0.202	0.431086	1.14803e-16
rs11511253	rs7069025	0.891125	0.993301	RP11-291L22.9	ENSG00000276805.2	Adipose - Subcutaneous	G=0.798	A=0.202	0.431086	1.14803e-16
rs11511253	rs12770432	0.891125	0.993301	RP11-291L22.9	ENSG00000276805.2	Adipose - Subcutaneous	G=0.798	A=0.202	0.431086	1.14803e-16
rs11511253	rs10870362	0.993466	1	RP11-291L22.9	ENSG00000276805.2	Adipose - Subcutaneous	G=0.813	A=0.187	0.466601	1.35859e-16
rs11511253	rs34458842	0.967718	0.993407	RP11-291L22.9	ENSG00000276805.2	Adipose - Subcutaneous	TG=0.811	T=0.189	0.463249	1.7261e-16
rs11511253	rs4070543	0.891125	0.993301	RP11-291L22.9	ENSG00000276805.2	Adipose - Subcutaneous	G=0.798	A=0.202	0.425548	1.99062e-16
rs11511253	rs7099107	0.967718	0.993407	RP11-291L22.9	ENSG00000276805.2	Adipose - Subcutaneous	G=0.811	A=0.189	0.45786	2.04145e-16
rs11511253	rs11146713	0.967718	0.993407	RP11-291L22.9	ENSG00000276805.2	Adipose - Subcutaneous	G=0.811	T=0.189	0.458006	2.05027e-16
rs11511253	rs3928516	0.993466	1	RP11-291L22.9	ENSG00000276805.2	Artery - Tibial	G=0.813	T=0.187	0.456615	2.40688e-16
rs11511253	rs200253039	0.993439	1	RP11-291L22.9	ENSG00000276805.2	Artery - Tibial	C=0.815	T=0.185	0.457285	2.46799e-16
rs11511253	rs200220357	0.993439	1	RP11-291L22.9	ENSG00000276805.2	Adipose - Subcutaneous	C=0.815	T=0.185	0.460054	2.51695e-16
rs11511253	rs11146654	0.967718	0.993407	RP11-291L22.9	ENSG00000276805.2	Adipose - Subcutaneous	C=0.811	T=0.189	0.456276	2.78062e-16
rs11511253	rs9731107	0.967718	0.993407	RP11-291L22.9	ENSG00000276805.2	Adipose - Subcutaneous	G=0.811	A=0.189	0.456276	2.78062e-16
rs11511253	rs7071794	0.967718	0.993407	RP11-291L22.9	ENSG00000276805.2	Adipose - Subcutaneous	T=0.811	A=0.189	0.456276	2.78062e-16
rs11511253	rs11146702	0.967718	0.993407	RP11-291L22.9	ENSG00000276805.2	Adipose - Subcutaneous	G=0.811	A=0.189	0.456276	2.78062e-16
rs11511253	rs11146709	0.967718	0.993407	RP11-291L22.9	ENSG00000276805.2	Adipose - Subcutaneous	C=0.811	T=0.189	0.456276	2.78062e-16
rs11511253	rs11597575	0.967718	0.993407	RP11-291L22.9	ENSG00000276805.2	Adipose - Subcutaneous	G=0.811	C=0.189	0.456276	2.78062e-16
rs11511253	rs10870406	0.967718	0.993407	RP11-291L22.9	ENSG00000276805.2	Adipose - Subcutaneous	G=0.811	A=0.189	0.456276	2.78062e-16
rs11511253	rs4881578	0.967718	0.993407	RP11-291L22.9	ENSG00000276805.2	Adipose - Subcutaneous	G=0.811	A=0.189	0.456276	2.78062e-16
rs11511253	rs4881584	0.967718	0.993407	RP11-291L22.9	ENSG00000276805.2	Adipose - Subcutaneous	C=0.811	T=0.189	0.456276	2.78062e-16
rs11511253	rs11146753	0.967718	0.993407	RP11-291L22.9	ENSG00000276805.2	Adipose - Subcutaneous	A=0.811	G=0.189	0.456276	2.78062e-16
rs11511253	rs10870421	0.967718	0.993407	RP11-291L22.9	ENSG00000276805.2	Adipose - Subcutaneous	C=0.811	A=0.189	0.456276	2.78062e-16
rs11511253	rs11146784	0.961456	0.993399	RP11-291L22.9	ENSG00000276805.2	Adipose - Subcutaneous	C=0.81	T=0.19	0.456276	2.78062e-16
rs11511253	rs12357698	0.967718	0.993407	RP11-291L22.9	ENSG00000276805.2	Adipose - Subcutaneous	T=0.811	A=0.189	0.456276	2.78062e-16
rs11511253	rs4556804	0.967718	0.993407	RP11-291L22.9	ENSG00000276805.2	Adipose - Subcutaneous	G=0.811	A=0.189	0.456276	2.78062e-16
rs11511253	rs11011546	0.986895	1	RP11-291L22.9	ENSG00000276805.2	Adipose - Subcutaneous	G=0.816	A=0.184	0.459903	2.81687e-16
rs11511253	rs61840410	0.891125	0.993301	RP11-291L22.9	ENSG00000276805.2	Adipose - Subcutaneous	C=0.798	T=0.202	0.427991	2.83204e-16
rs11511253	rs7095128	0.993439	1	RP11-291L22.9	ENSG00000276805.2	Adipose - Subcutaneous	G=0.815	C=0.185	0.459521	2.83414e-16
rs11511253	rs11146655	0.961177	0.986831	RP11-291L22.9	ENSG00000276805.2	Adipose - Subcutaneous	A=0.812	G=0.188	0.46273	2.96624e-16
rs11511253	rs200474745	0.974046	0.993415	HSD17B7P2	ENSG00000099251.14	Whole Blood	CGAATGGAATG=0.812	C=0.188	0.350701	3.31831e-16
rs11511253	rs11011558	0.993439	1	RP11-291L22.9	ENSG00000276805.2	Artery - Tibial	G=0.815	A=0.185	0.450541	3.36503e-16
rs11511253	rs11511253	1	1	RP11-291L22.9	ENSG00000276805.2	Artery - Tibial	G=0.814	A=0.186	0.456691	3.67515e-16
rs11511253	rs11595308	1	1	RP11-291L22.9	ENSG00000276805.2	Artery - Tibial	C=0.814	A=0.186	0.456691	3.67515e-16
rs11511253	rs11146621	0.993466	1	RP11-291L22.9	ENSG00000276805.2	Artery - Tibial	G=0.813	A=0.187	0.456691	3.67515e-16
rs11511253	rs2310211	0.993466	1	RP11-291L22.9	ENSG00000276805.2	Artery - Tibial	G=0.813	A=0.187	0.456691	3.67515e-16
rs11511253	rs2180899	0.728744	1	RP11-291L22.9	ENSG00000276805.2	Adipose - Subcutaneous	G=0.761	A=0.239	0.415147	3.71974e-16
rs11511253	rs4881618	0.993466	1	RP11-291L22.9	ENSG00000276805.2	Adipose - Subcutaneous	G=0.813	T=0.187	0.458579	4.13653e-16
rs11511253	rs7074243	0.961456	0.993399	RP11-291L22.9	ENSG00000276805.2	Adipose - Subcutaneous	A=0.81	T=0.19	0.451729	4.37039e-16
rs11511253	rs11817950	0.954916	0.986815	RP11-291L22.9	ENSG00000276805.2	Adipose - Subcutaneous	C=0.811	T=0.189	0.451729	4.37039e-16
rs11511253	rs11146768	0.967718	0.993407	RP11-291L22.9	ENSG00000276805.2	Adipose - Subcutaneous	C=0.811	T=0.189	0.451729	4.37039e-16
rs11511253	rs11592779	0.872669	0.979927	RP11-291L22.9	ENSG00000276805.2	Artery - Tibial	C=0.799	T=0.201	0.428386	4.44104e-16
rs11511253	rs7923903	0.879145	0.986601	RP11-291L22.9	ENSG00000276805.2	Artery - Tibial	G=0.798	A=0.202	0.428386	4.44104e-16
rs11511253	rs7896006	0.879145	0.986601	RP11-291L22.9	ENSG00000276805.2	Artery - Tibial	C=0.798	T=0.202	0.428386	4.44104e-16
rs11511253	rs7896545	0.879145	0.986601	RP11-291L22.9	ENSG00000276805.2	Artery - Tibial	C=0.798	T=0.202	0.428386	4.44104e-16
rs11511253	rs7076099	0.879145	0.986601	RP11-291L22.9	ENSG00000276805.2	Artery - Tibial	G=0.798	A=0.202	0.428386	4.44104e-16
rs11511253	rs1902549	0.967718	0.993407	RP11-291L22.9	ENSG00000276805.2	Adipose - Subcutaneous	C=0.811	T=0.189	0.456653	4.44772e-16
rs11511253	rs71500469	0.967718	0.993407	RP11-291L22.9	ENSG00000276805.2	Adipose - Subcutaneous	T=0.811	G=0.189	0.470513	4.72824e-16
rs11511253	rs4088497	0.993466	1	RP11-291L22.9	ENSG00000276805.2	Artery - Tibial	T=0.813	C=0.187	0.457935	4.79356e-16
rs11511253	rs12775411	0.95526	0.993391	RP11-291L22.9	ENSG00000276805.2	Artery - Tibial	G=0.809	A=0.191	0.451597	5.13652e-16
rs11511253	rs7068733	0.948142	0.973726	RP11-291L22.9	ENSG00000276805.2	Artery - Tibial	C=0.814	G=0.186	0.452529	5.21119e-16
rs11511253	rs12773561	0.967718	0.993407	RP11-291L22.9	ENSG00000276805.2	Adipose - Subcutaneous	G=0.811	C=0.189	0.449063	5.48642e-16
rs11511253	rs367919155	0.993439	1	RP11-291L22.9	ENSG00000276805.2	Artery - Tibial	G=0.815	C=0.185	0.454231	5.49457e-16
rs11511253	rs2310280	0.986895	1	RP11-291L22.9	ENSG00000276805.2	Adipose - Subcutaneous	A=0.816	G=0.184	0.460853	5.72446e-16
rs11511253	rs11146877	0.986895	1	RP11-291L22.9	ENSG00000276805.2	Adipose - Subcutaneous	C=0.816	T=0.184	0.460853	5.72446e-16
rs11511253	rs12775895	0.607434	0.985401	RP11-291L22.9	ENSG00000276805.2	Nerve - Tibial	G=0.733	A=0.267	0.456677	6.02736e-16
rs11511253	rs11597330	0.974276	1	RP11-291L22.9	ENSG00000276805.2	Adipose - Subcutaneous	C=0.81	T=0.19	0.444866	7.02961e-16
rs11511253	rs11146869	0.993439	1	RP11-291L22.9	ENSG00000276805.2	Adipose - Subcutaneous	A=0.815	G=0.185	0.454602	7.04153e-16
rs11511253	rs61839284	0.993439	1	RP11-291L22.9	ENSG00000276805.2	Adipose - Subcutaneous	A=0.815	C=0.185	0.454602	7.04153e-16
rs11511253	rs34019437	0.993439	1	RP11-291L22.9	ENSG00000276805.2	Adipose - Subcutaneous	C=0.815	T=0.185	0.454602	7.04153e-16
rs11511253	rs4326715	0.993466	1	RP11-291L22.9	ENSG00000276805.2	Adipose - Subcutaneous	A=0.813	G=0.187	0.454602	7.04153e-16
rs11511253	rs2310210	0.980362	0.993396	RP11-291L22.9	ENSG00000276805.2	Adipose - Subcutaneous	G=0.815	A=0.185	0.454602	7.04153e-16
rs11511253	rs12775411	0.95526	0.993391	RP11-291L22.9	ENSG00000276805.2	Adipose - Subcutaneous	G=0.809	A=0.191	0.446796	7.10381e-16
rs11511253	rs11011542	0.980366	1	RP11-291L22.9	ENSG00000276805.2	Adipose - Subcutaneous	C=0.817	T=0.183	0.458802	7.49278e-16
rs11511253	rs4881586	0.86621	0.973269	RP11-291L22.9	ENSG00000276805.2	Artery - Tibial	C=0.8	T=0.2	0.426253	8.56654e-16
rs11511253	rs7068365	0.967718	0.993407	RP11-291L22.9	ENSG00000276805.2	Adipose - Subcutaneous	C=0.811	T=0.189	0.446425	9.06509e-16
rs11511253	rs144280981	0.986906	0.993431	RP11-291L22.9	ENSG00000276805.2	Artery - Tibial	C=0.814	T=0.186	0.448863	9.1738e-16
rs11511253	rs7093896	0.993439	1	RP11-291L22.9	ENSG00000276805.2	Artery - Tibial	A=0.815	T=0.185	0.448863	9.1738e-16
rs11511253	rs3087759	0.993439	1	RP11-291L22.9	ENSG00000276805.2	Artery - Tibial	A=0.815	C=0.185	0.448863	9.1738e-16
rs11511253	rs4934946	0.993439	1	RP11-291L22.9	ENSG00000276805.2	Artery - Tibial	T=0.815	C=0.185	0.448863	9.1738e-16
rs11511253	rs11011555	0.993439	1	RP11-291L22.9	ENSG00000276805.2	Artery - Tibial	T=0.815	C=0.185	0.448863	9.1738e-16
rs11511253	rs61837224	0.993439	1	RP11-291L22.9	ENSG00000276805.2	Artery - Tibial	G=0.815	C=0.185	0.448863	9.1738e-16
rs11511253	rs117398853	0.993439	1	RP11-291L22.9	ENSG00000276805.2	Artery - Tibial	C=0.815	G=0.185	0.448863	9.1738e-16
rs11511253	rs9663128	0.993439	1	RP11-291L22.9	ENSG00000276805.2	Artery - Tibial	C=0.815	G=0.185	0.448863	9.1738e-16
rs11511253	rs7088208	0.986906	0.993431	RP11-291L22.9	ENSG00000276805.2	Artery - Tibial	T=0.814	C=0.186	0.448863	9.1738e-16
rs11511253	rs117840800	0.993439	1	RP11-291L22.9	ENSG00000276805.2	Artery - Tibial	A=0.815	G=0.185	0.448863	9.1738e-16
rs11511253	rs74890899	0.986895	1	RP11-291L22.9	ENSG00000276805.2	Artery - Tibial	C=0.816	T=0.184	0.448863	9.1738e-16
rs11511253	rs1810634	0.993439	1	RP11-291L22.9	ENSG00000276805.2	Artery - Tibial	A=0.815	G=0.185	0.448863	9.1738e-16
rs11511253	rs9664768	0.993439	1	RP11-291L22.9	ENSG00000276805.2	Artery - Tibial	G=0.815	A=0.185	0.448863	9.1738e-16
rs11511253	rs72639568	0.993439	1	RP11-291L22.9	ENSG00000276805.2	Artery - Tibial	G=0.815	A=0.185	0.448863	9.1738e-16
rs11511253	rs77114817	0.986895	1	RP11-291L22.9	ENSG00000276805.2	Artery - Tibial	T=0.816	C=0.184	0.448863	9.1738e-16
rs11511253	rs11492515	0.993439	1	RP11-291L22.9	ENSG00000276805.2	Artery - Tibial	C=0.815	T=0.185	0.448863	9.1738e-16
rs11511253	rs11492459	0.993439	1	RP11-291L22.9	ENSG00000276805.2	Artery - Tibial	T=0.815	C=0.185	0.448863	9.1738e-16
rs11511253	rs7084618	0.993439	1	RP11-291L22.9	ENSG00000276805.2	Artery - Tibial	A=0.815	T=0.185	0.448863	9.1738e-16
rs11511253	rs7095113	0.993439	1	RP11-291L22.9	ENSG00000276805.2	Artery - Tibial	G=0.815	A=0.185	0.448863	9.1738e-16
rs11511253	rs148773254	0.993439	1	RP11-291L22.9	ENSG00000276805.2	Artery - Tibial	C=0.815	T=0.185	0.448863	9.1738e-16
rs11511253	rs4623823	0.993439	1	RP11-291L22.9	ENSG00000276805.2	Artery - Tibial	C=0.815	T=0.185	0.448863	9.1738e-16
rs11511253	rs35712971	0.993439	1	RP11-291L22.9	ENSG00000276805.2	Artery - Tibial	A=0.815	T=0.185	0.448863	9.1738e-16
rs11511253	rs4572067	0.993439	1	RP11-291L22.9	ENSG00000276805.2	Artery - Tibial	G=0.815	T=0.185	0.448863	9.1738e-16
rs11511253	rs11146911	1	1	RP11-291L22.9	ENSG00000276805.2	Artery - Tibial	C=0.814	A=0.186	0.448863	9.1738e-16
rs11511253	rs7070930	0.986895	1	RP11-291L22.9	ENSG00000276805.2	Adipose - Subcutaneous	G=0.816	C=0.184	0.454105	9.33675e-16
rs11511253	rs80081575	0.986895	1	RP11-291L22.9	ENSG00000276805.2	Adipose - Subcutaneous	G=0.816	A=0.184	0.454105	9.33675e-16
rs11511253	rs7087510	0.891125	0.993301	RP11-291L22.9	ENSG00000276805.2	Artery - Tibial	G=0.798	A=0.202	0.424394	9.4024e-16
rs11511253	rs138310998	0.891125	0.993301	RP11-291L22.9	ENSG00000276805.2	Artery - Tibial	G=0.798	A=0.202	0.424394	9.4024e-16
rs11511253	rs4070543	0.891125	0.993301	RP11-291L22.9	ENSG00000276805.2	Artery - Tibial	G=0.798	A=0.202	0.424394	9.4024e-16
rs11511253	rs12571329	0.891125	0.993301	RP11-291L22.9	ENSG00000276805.2	Artery - Tibial	G=0.798	A=0.202	0.424394	9.4024e-16
rs11511253	rs7069025	0.891125	0.993301	RP11-291L22.9	ENSG00000276805.2	Artery - Tibial	G=0.798	A=0.202	0.424394	9.4024e-16
rs11511253	rs12770432	0.891125	0.993301	RP11-291L22.9	ENSG00000276805.2	Artery - Tibial	G=0.798	A=0.202	0.424394	9.4024e-16
rs11511253	rs12772118	0.961177	0.986831	RP11-291L22.9	ENSG00000276805.2	Adipose - Subcutaneous	T=0.812	G=0.188	0.452308	1.0509e-15
rs11511253	rs9664979	0.961177	0.986831	RP11-291L22.9	ENSG00000276805.2	Adipose - Subcutaneous	G=0.812	A=0.188	0.452308	1.0509e-15
rs11511253	rs7910228	0.961177	0.986831	RP11-291L22.9	ENSG00000276805.2	Adipose - Subcutaneous	A=0.812	T=0.188	0.452308	1.0509e-15
rs11511253	rs7099107	0.967718	0.993407	RP11-291L22.9	ENSG00000276805.2	Artery - Tibial	G=0.811	A=0.189	0.450501	1.07187e-15
rs11511253	rs11812823	0.986895	1	RP11-291L22.9	ENSG00000276805.2	Adipose - Subcutaneous	T=0.816	C=0.184	0.455516	1.07929e-15
rs11511253	rs112309001	0.986895	1	RP11-291L22.9	ENSG00000276805.2	Adipose - Subcutaneous	AG=0.816	A=0.184	0.455516	1.07929e-15
rs11511253	rs2012084	0.973898	0.986863	RP11-291L22.9	ENSG00000276805.2	Adipose - Subcutaneous	T=0.814	C=0.186	0.455516	1.07929e-15
rs11511253	rs35747454	0.986895	1	RP11-291L22.9	ENSG00000276805.2	Adipose - Subcutaneous	G=0.816	T=0.184	0.455516	1.07929e-15
rs11511253	rs12354584	0.986895	1	RP11-291L22.9	ENSG00000276805.2	Adipose - Subcutaneous	G=0.816	T=0.184	0.455516	1.07929e-15
rs11511253	rs11511148	0.986895	1	RP11-291L22.9	ENSG00000276805.2	Adipose - Subcutaneous	C=0.816	T=0.184	0.455516	1.07929e-15
rs11511253	rs11011567	0.986895	1	RP11-291L22.9	ENSG00000276805.2	Adipose - Subcutaneous	A=0.816	G=0.184	0.455516	1.07929e-15
rs11511253	rs28413086	0.986895	1	RP11-291L22.9	ENSG00000276805.2	Adipose - Subcutaneous	T=0.816	G=0.184	0.455516	1.07929e-15
rs11511253	rs35451472	0.986895	1	RP11-291L22.9	ENSG00000276805.2	Adipose - Subcutaneous	C=0.816	T=0.184	0.455516	1.07929e-15
rs11511253	rs11146894	0.986895	1	RP11-291L22.9	ENSG00000276805.2	Artery - Tibial	G=0.816	A=0.184	0.450927	1.08514e-15
rs11511253	rs7076118	0.986895	1	RP11-291L22.9	ENSG00000276805.2	Adipose - Subcutaneous	C=0.816	A=0.184	0.452539	1.10473e-15
rs11511253	rs11596501	0.986895	1	RP11-291L22.9	ENSG00000276805.2	Adipose - Subcutaneous	G=0.816	A=0.184	0.451615	1.13577e-15
rs11511253	rs200220357	0.993439	1	RP11-291L22.9	ENSG00000276805.2	Artery - Tibial	C=0.815	T=0.185	0.451293	1.16188e-15
rs11511253	rs61840410	0.891125	0.993301	RP11-291L22.9	ENSG00000276805.2	Artery - Tibial	C=0.798	T=0.202	0.424621	1.34124e-15
rs11511253	rs12775030	0.993439	1	RP11-291L22.9	ENSG00000276805.2	Artery - Tibial	C=0.815	T=0.185	0.445831	1.37069e-15
rs11511253	rs11011558	0.993439	1	HSD17B7P2	ENSG00000099251.14	Whole Blood	G=0.815	A=0.185	0.340468	1.37814e-15
rs11511253	rs11146613	0.993439	1	RP11-291L22.9	ENSG00000276805.2	Adipose - Subcutaneous	C=0.815	T=0.185	0.457587	1.40358e-15
rs11511253	rs11011543	0.986895	1	RP11-291L22.9	ENSG00000276805.2	Artery - Tibial	A=0.816	T=0.184	0.446524	1.48938e-15
rs11511253	rs10827866	0.986895	1	RP11-291L22.9	ENSG00000276805.2	Artery - Tibial	G=0.816	T=0.184	0.446524	1.48938e-15
rs11511253	rs66610970	0.986895	1	RP11-291L22.9	ENSG00000276805.2	Artery - Tibial	CT=0.816	C=0.184	0.446524	1.48938e-15
rs11511253	rs138284504	0.986895	1	RP11-291L22.9	ENSG00000276805.2	Artery - Tibial	C=0.816	T=0.184	0.446524	1.48938e-15
rs11511253	rs10827867	0.986895	1	RP11-291L22.9	ENSG00000276805.2	Artery - Tibial	T=0.816	C=0.184	0.446524	1.48938e-15
rs11511253	rs2180800	0.980362	0.993396	RP11-291L22.9	ENSG00000276805.2	Adipose - Subcutaneous	C=0.815	T=0.185	0.448663	1.48963e-15
rs11511253	rs7074243	0.961456	0.993399	RP11-291L22.9	ENSG00000276805.2	Artery - Tibial	A=0.81	T=0.19	0.446368	1.5391e-15
rs11511253	rs11817950	0.954916	0.986815	RP11-291L22.9	ENSG00000276805.2	Artery - Tibial	C=0.811	T=0.189	0.446368	1.5391e-15
rs11511253	rs11146768	0.967718	0.993407	RP11-291L22.9	ENSG00000276805.2	Artery - Tibial	C=0.811	T=0.189	0.446368	1.5391e-15
rs11511253	rs11146654	0.967718	0.993407	RP11-291L22.9	ENSG00000276805.2	Artery - Tibial	C=0.811	T=0.189	0.4479	1.62044e-15
rs11511253	rs9731107	0.967718	0.993407	RP11-291L22.9	ENSG00000276805.2	Artery - Tibial	G=0.811	A=0.189	0.4479	1.62044e-15
rs11511253	rs7071794	0.967718	0.993407	RP11-291L22.9	ENSG00000276805.2	Artery - Tibial	T=0.811	A=0.189	0.4479	1.62044e-15
rs11511253	rs11146702	0.967718	0.993407	RP11-291L22.9	ENSG00000276805.2	Artery - Tibial	G=0.811	A=0.189	0.4479	1.62044e-15
rs11511253	rs11146709	0.967718	0.993407	RP11-291L22.9	ENSG00000276805.2	Artery - Tibial	C=0.811	T=0.189	0.4479	1.62044e-15
rs11511253	rs11146713	0.967718	0.993407	RP11-291L22.9	ENSG00000276805.2	Artery - Tibial	G=0.811	T=0.189	0.4479	1.62044e-15
rs11511253	rs11597575	0.967718	0.993407	RP11-291L22.9	ENSG00000276805.2	Artery - Tibial	G=0.811	C=0.189	0.4479	1.62044e-15
rs11511253	rs10870406	0.967718	0.993407	RP11-291L22.9	ENSG00000276805.2	Artery - Tibial	G=0.811	A=0.189	0.4479	1.62044e-15
rs11511253	rs4881578	0.967718	0.993407	RP11-291L22.9	ENSG00000276805.2	Artery - Tibial	G=0.811	A=0.189	0.4479	1.62044e-15
rs11511253	rs4881584	0.967718	0.993407	RP11-291L22.9	ENSG00000276805.2	Artery - Tibial	C=0.811	T=0.189	0.4479	1.62044e-15
rs11511253	rs11146753	0.967718	0.993407	RP11-291L22.9	ENSG00000276805.2	Artery - Tibial	A=0.811	G=0.189	0.4479	1.62044e-15
rs11511253	rs10870421	0.967718	0.993407	RP11-291L22.9	ENSG00000276805.2	Artery - Tibial	C=0.811	A=0.189	0.4479	1.62044e-15
rs11511253	rs12773561	0.967718	0.993407	RP11-291L22.9	ENSG00000276805.2	Artery - Tibial	G=0.811	C=0.189	0.4479	1.62044e-15
rs11511253	rs11146784	0.961456	0.993399	RP11-291L22.9	ENSG00000276805.2	Artery - Tibial	C=0.81	T=0.19	0.4479	1.62044e-15
rs11511253	rs12357698	0.967718	0.993407	RP11-291L22.9	ENSG00000276805.2	Artery - Tibial	T=0.811	A=0.189	0.4479	1.62044e-15
rs11511253	rs4556804	0.967718	0.993407	RP11-291L22.9	ENSG00000276805.2	Artery - Tibial	G=0.811	A=0.189	0.4479	1.62044e-15
rs11511253	rs35361303	0.961177	0.986831	RP11-291L22.9	ENSG00000276805.2	Adipose - Subcutaneous	C=0.812	G=0.188	0.447637	1.64603e-15
rs11511253	rs35173665	0.948722	0.986798	RP11-291L22.9	ENSG00000276805.2	Adipose - Subcutaneous	T=0.81	G=0.19	0.447637	1.64603e-15
rs11511253	rs7068771	0.961177	0.986831	RP11-291L22.9	ENSG00000276805.2	Adipose - Subcutaneous	T=0.812	G=0.188	0.447637	1.64603e-15
rs11511253	rs12570560	0.891125	0.993301	RP11-291L22.9	ENSG00000276805.2	Artery - Tibial	C=0.798	G=0.202	0.421198	1.6889e-15
rs11511253	rs2180899	0.728744	1	HSD17B7P2	ENSG00000099251.14	Whole Blood	G=0.761	A=0.239	0.312481	1.94981e-15
rs11511253	rs7089593	0.980362	0.993396	RP11-291L22.9	ENSG00000276805.2	Adipose - Subcutaneous	A=0.815	G=0.185	0.448755	2.04928e-15
rs11511253	rs7089975	0.980362	0.993396	RP11-291L22.9	ENSG00000276805.2	Adipose - Subcutaneous	A=0.815	G=0.185	0.448755	2.04928e-15
rs11511253	rs10870418	0.961177	0.986831	RP11-291L22.9	ENSG00000276805.2	Adipose - Subcutaneous	C=0.812	T=0.188	0.448107	2.05586e-15
rs11511253	rs4881585	0.961177	0.986831	RP11-291L22.9	ENSG00000276805.2	Adipose - Subcutaneous	A=0.812	G=0.188	0.448107	2.05586e-15
rs11511253	rs35949805	0.896667	0.993309	RP11-291L22.9	ENSG00000276805.2	Artery - Tibial	G=0.799	A=0.201	0.432278	2.06912e-15
rs11511253	rs200474745	0.974046	0.993415	RP11-291L22.9	ENSG00000276805.2	Adipose - Subcutaneous	CGAATGGAATG=0.812	C=0.188	0.445594	2.09382e-15
rs11511253	rs12358135	0.879145	0.986601	RP11-291L22.9	ENSG00000276805.2	Artery - Tibial	C=0.798	T=0.202	0.425162	2.14807e-15
rs11511253	rs200253039	0.993439	1	HSD17B7P2	ENSG00000099251.14	Whole Blood	C=0.815	T=0.185	0.34093	2.16345e-15
rs11511253	rs7068365	0.967718	0.993407	RP11-291L22.9	ENSG00000276805.2	Artery - Tibial	C=0.811	T=0.189	0.443761	2.21759e-15
rs11511253	rs61839915	0.980362	0.993396	RP11-291L22.9	ENSG00000276805.2	Adipose - Subcutaneous	C=0.815	T=0.185	0.447459	2.2983e-15
rs11511253	rs71500469	0.967718	0.993407	RP11-291L22.9	ENSG00000276805.2	Artery - Tibial	T=0.811	G=0.189	0.460827	2.40831e-15
rs11511253	rs34873071	0.986895	1	RP11-291L22.9	ENSG00000276805.2	Adipose - Subcutaneous	G=0.816	T=0.184	0.450643	2.62036e-15
rs11511253	rs58673518	0.986895	1	RP11-291L22.9	ENSG00000276805.2	Adipose - Subcutaneous	G=0.816	T=0.184	0.450643	2.62036e-15
rs11511253	rs2085430	0.993439	1	RP11-291L22.9	ENSG00000276805.2	Adipose - Subcutaneous	C=0.815	G=0.185	0.450643	2.62036e-15
rs11511253	rs10870459	0.986895	1	RP11-291L22.9	ENSG00000276805.2	Adipose - Subcutaneous	A=0.816	G=0.184	0.450643	2.62036e-15
rs11511253	rs182246855	0.973833	0.99336	RP11-291L22.9	ENSG00000276805.2	Adipose - Subcutaneous	G=0.816	A=0.184	0.450643	2.62036e-15
rs11511253	rs12359136	0.986906	0.993431	RP11-291L22.9	ENSG00000276805.2	Adipose - Subcutaneous	A=0.814	T=0.186	0.450643	2.62036e-15
rs11511253	rs11146640	0.993439	1	RP11-291L22.9	ENSG00000276805.2	Adipose - Subcutaneous	G=0.815	A=0.185	0.450643	2.62036e-15
rs11511253	rs111563184	0.891243	0.947169	RP11-291L22.9	ENSG00000276805.2	Artery - Tibial	G=0.815	GC=0.185	0.436183	2.6459e-15
rs11511253	rs9794215	0.967718	0.993407	RP11-291L22.9	ENSG00000276805.2	Adipose - Subcutaneous	C=0.811	T=0.189	0.449912	2.66348e-15
rs11511253	rs144280981	0.986906	0.993431	RP11-291L22.9	ENSG00000276805.2	Cells - Cultured fibroblasts	C=0.814	T=0.186	0.474336	2.84426e-15
rs11511253	rs7093896	0.993439	1	RP11-291L22.9	ENSG00000276805.2	Cells - Cultured fibroblasts	A=0.815	T=0.185	0.474336	2.84426e-15
rs11511253	rs3087759	0.993439	1	RP11-291L22.9	ENSG00000276805.2	Cells - Cultured fibroblasts	A=0.815	C=0.185	0.474336	2.84426e-15
rs11511253	rs4934946	0.993439	1	RP11-291L22.9	ENSG00000276805.2	Cells - Cultured fibroblasts	T=0.815	C=0.185	0.474336	2.84426e-15
rs11511253	rs11011555	0.993439	1	RP11-291L22.9	ENSG00000276805.2	Cells - Cultured fibroblasts	T=0.815	C=0.185	0.474336	2.84426e-15
rs11511253	rs61837224	0.993439	1	RP11-291L22.9	ENSG00000276805.2	Cells - Cultured fibroblasts	G=0.815	C=0.185	0.474336	2.84426e-15
rs11511253	rs117398853	0.993439	1	RP11-291L22.9	ENSG00000276805.2	Cells - Cultured fibroblasts	C=0.815	G=0.185	0.474336	2.84426e-15
rs11511253	rs9663128	0.993439	1	RP11-291L22.9	ENSG00000276805.2	Cells - Cultured fibroblasts	C=0.815	G=0.185	0.474336	2.84426e-15
rs11511253	rs7088208	0.986906	0.993431	RP11-291L22.9	ENSG00000276805.2	Cells - Cultured fibroblasts	T=0.814	C=0.186	0.474336	2.84426e-15
rs11511253	rs117840800	0.993439	1	RP11-291L22.9	ENSG00000276805.2	Cells - Cultured fibroblasts	A=0.815	G=0.185	0.474336	2.84426e-15
rs11511253	rs74890899	0.986895	1	RP11-291L22.9	ENSG00000276805.2	Cells - Cultured fibroblasts	C=0.816	T=0.184	0.474336	2.84426e-15
rs11511253	rs1810634	0.993439	1	RP11-291L22.9	ENSG00000276805.2	Cells - Cultured fibroblasts	A=0.815	G=0.185	0.474336	2.84426e-15
rs11511253	rs9664768	0.993439	1	RP11-291L22.9	ENSG00000276805.2	Cells - Cultured fibroblasts	G=0.815	A=0.185	0.474336	2.84426e-15
rs11511253	rs72639568	0.993439	1	RP11-291L22.9	ENSG00000276805.2	Cells - Cultured fibroblasts	G=0.815	A=0.185	0.474336	2.84426e-15
rs11511253	rs77114817	0.986895	1	RP11-291L22.9	ENSG00000276805.2	Cells - Cultured fibroblasts	T=0.816	C=0.184	0.474336	2.84426e-15
rs11511253	rs11492515	0.993439	1	RP11-291L22.9	ENSG00000276805.2	Cells - Cultured fibroblasts	C=0.815	T=0.185	0.474336	2.84426e-15
rs11511253	rs11492459	0.993439	1	RP11-291L22.9	ENSG00000276805.2	Cells - Cultured fibroblasts	T=0.815	C=0.185	0.474336	2.84426e-15
rs11511253	rs200253039	0.993439	1	RP11-291L22.9	ENSG00000276805.2	Cells - Cultured fibroblasts	C=0.815	T=0.185	0.474336	2.84426e-15
rs11511253	rs7084618	0.993439	1	RP11-291L22.9	ENSG00000276805.2	Cells - Cultured fibroblasts	A=0.815	T=0.185	0.474336	2.84426e-15
rs11511253	rs7095113	0.993439	1	RP11-291L22.9	ENSG00000276805.2	Cells - Cultured fibroblasts	G=0.815	A=0.185	0.474336	2.84426e-15
rs11511253	rs148773254	0.993439	1	RP11-291L22.9	ENSG00000276805.2	Cells - Cultured fibroblasts	C=0.815	T=0.185	0.474336	2.84426e-15
rs11511253	rs12775030	0.993439	1	RP11-291L22.9	ENSG00000276805.2	Cells - Cultured fibroblasts	C=0.815	T=0.185	0.474336	2.84426e-15
rs11511253	rs4623823	0.993439	1	RP11-291L22.9	ENSG00000276805.2	Cells - Cultured fibroblasts	C=0.815	T=0.185	0.474336	2.84426e-15
rs11511253	rs11146894	0.986895	1	RP11-291L22.9	ENSG00000276805.2	Cells - Cultured fibroblasts	G=0.816	A=0.184	0.474336	2.84426e-15
rs11511253	rs4572067	0.993439	1	RP11-291L22.9	ENSG00000276805.2	Cells - Cultured fibroblasts	G=0.815	T=0.185	0.474336	2.84426e-15
rs11511253	rs11146911	1	1	RP11-291L22.9	ENSG00000276805.2	Cells - Cultured fibroblasts	C=0.814	A=0.186	0.474336	2.84426e-15
rs11511253	rs111563184	0.891243	0.947169	RP11-291L22.9	ENSG00000276805.2	Adipose - Subcutaneous	G=0.815	GC=0.185	0.440633	2.86795e-15
rs11511253	rs11011533	0.986895	1	HSD17B7P2	ENSG00000099251.14	Whole Blood	G=0.816	A=0.184	0.33904	2.93018e-15
rs11511253	rs10827860	0.986895	1	HSD17B7P2	ENSG00000099251.14	Whole Blood	G=0.816	A=0.184	0.33904	2.93018e-15
rs11511253	rs10827862	0.986895	1	HSD17B7P2	ENSG00000099251.14	Whole Blood	C=0.816	A=0.184	0.33904	2.93018e-15
rs11511253	rs7917312	0.986895	1	HSD17B7P2	ENSG00000099251.14	Whole Blood	C=0.816	T=0.184	0.33904	2.93018e-15
rs11511253	rs11011543	0.986895	1	HSD17B7P2	ENSG00000099251.14	Whole Blood	A=0.816	T=0.184	0.33904	2.93018e-15
rs11511253	rs10827866	0.986895	1	HSD17B7P2	ENSG00000099251.14	Whole Blood	G=0.816	T=0.184	0.33904	2.93018e-15
rs11511253	rs66610970	0.986895	1	HSD17B7P2	ENSG00000099251.14	Whole Blood	CT=0.816	C=0.184	0.33904	2.93018e-15
rs11511253	rs138284504	0.986895	1	HSD17B7P2	ENSG00000099251.14	Whole Blood	C=0.816	T=0.184	0.33904	2.93018e-15
rs11511253	rs10827867	0.986895	1	HSD17B7P2	ENSG00000099251.14	Whole Blood	T=0.816	C=0.184	0.33904	2.93018e-15
rs11511253	rs11011533	0.986895	1	RP11-291L22.9	ENSG00000276805.2	Artery - Tibial	G=0.816	A=0.184	0.442119	3.0895e-15
rs11511253	rs10827860	0.986895	1	RP11-291L22.9	ENSG00000276805.2	Artery - Tibial	G=0.816	A=0.184	0.442119	3.0895e-15
rs11511253	rs10827862	0.986895	1	RP11-291L22.9	ENSG00000276805.2	Artery - Tibial	C=0.816	A=0.184	0.442119	3.0895e-15
rs11511253	rs7917312	0.986895	1	RP11-291L22.9	ENSG00000276805.2	Artery - Tibial	C=0.816	T=0.184	0.442119	3.0895e-15
rs11511253	rs10764162	0.616859	0.98546	SEPT7P9	ENSG00000120555.13	Artery - Tibial	C=0.736	T=0.264	0.379148	3.11166e-15
rs11511253	rs12775895	0.607434	0.985401	SEPT7P9	ENSG00000120555.13	Artery - Tibial	G=0.733	A=0.267	0.389776	3.17087e-15
rs11511253	rs11011558	0.993439	1	RP11-291L22.9	ENSG00000276805.2	Esophagus - Mucosa	G=0.815	A=0.185	0.437533	3.17601e-15
rs11511253	rs7081059	0.961177	0.986831	RP11-291L22.9	ENSG00000276805.2	Adipose - Subcutaneous	C=0.812	A=0.188	0.442457	3.32197e-15
rs11511253	rs61837257	0.993439	1	HSD17B7P2	ENSG00000099251.14	Whole Blood	C=0.815	G=0.185	0.340022	3.40782e-15
rs11511253	rs61837257	0.993439	1	RP11-291L22.9	ENSG00000276805.2	Artery - Tibial	C=0.815	G=0.185	0.442236	3.43714e-15
rs11511253	rs79613030	0.993439	1	RP11-291L22.9	ENSG00000276805.2	Artery - Tibial	G=0.815	A=0.185	0.441067	3.51375e-15
rs11511253	rs61839484	0.993439	1	RP11-291L22.9	ENSG00000276805.2	Artery - Tibial	G=0.815	A=0.185	0.441067	3.51375e-15
rs11511253	rs11011558	0.993439	1	RP11-291L22.9	ENSG00000276805.2	Cells - Cultured fibroblasts	G=0.815	A=0.185	0.470252	3.65551e-15
rs11511253	rs12358135	0.879145	0.986601	RP11-291L22.9	ENSG00000276805.2	Adipose - Subcutaneous	C=0.798	T=0.202	0.41661	3.74632e-15
rs11511253	rs35712971	0.993439	1	RP11-291L22.9	ENSG00000276805.2	Cells - Cultured fibroblasts	A=0.815	T=0.185	0.473203	3.76859e-15
rs11511253	rs11011543	0.986895	1	RP11-291L22.9	ENSG00000276805.2	Cells - Cultured fibroblasts	A=0.816	T=0.184	0.47102	3.914e-15
rs11511253	rs10827866	0.986895	1	RP11-291L22.9	ENSG00000276805.2	Cells - Cultured fibroblasts	G=0.816	T=0.184	0.47102	3.914e-15
rs11511253	rs66610970	0.986895	1	RP11-291L22.9	ENSG00000276805.2	Cells - Cultured fibroblasts	CT=0.816	C=0.184	0.47102	3.914e-15
rs11511253	rs138284504	0.986895	1	RP11-291L22.9	ENSG00000276805.2	Cells - Cultured fibroblasts	C=0.816	T=0.184	0.47102	3.914e-15
rs11511253	rs10827867	0.986895	1	RP11-291L22.9	ENSG00000276805.2	Cells - Cultured fibroblasts	T=0.816	C=0.184	0.47102	3.914e-15
rs11511253	rs1902549	0.967718	0.993407	RP11-291L22.9	ENSG00000276805.2	Artery - Tibial	C=0.811	T=0.189	0.444124	3.96434e-15
rs11511253	rs144280981	0.986906	0.993431	HSD17B7P2	ENSG00000099251.14	Whole Blood	C=0.814	T=0.186	0.337227	4.05164e-15
rs11511253	rs7093896	0.993439	1	HSD17B7P2	ENSG00000099251.14	Whole Blood	A=0.815	T=0.185	0.337227	4.05164e-15
rs11511253	rs3087759	0.993439	1	HSD17B7P2	ENSG00000099251.14	Whole Blood	A=0.815	C=0.185	0.337227	4.05164e-15
rs11511253	rs4934946	0.993439	1	HSD17B7P2	ENSG00000099251.14	Whole Blood	T=0.815	C=0.185	0.337227	4.05164e-15
rs11511253	rs11011555	0.993439	1	HSD17B7P2	ENSG00000099251.14	Whole Blood	T=0.815	C=0.185	0.337227	4.05164e-15
rs11511253	rs61837224	0.993439	1	HSD17B7P2	ENSG00000099251.14	Whole Blood	G=0.815	C=0.185	0.337227	4.05164e-15
rs11511253	rs117398853	0.993439	1	HSD17B7P2	ENSG00000099251.14	Whole Blood	C=0.815	G=0.185	0.337227	4.05164e-15
rs11511253	rs9663128	0.993439	1	HSD17B7P2	ENSG00000099251.14	Whole Blood	C=0.815	G=0.185	0.337227	4.05164e-15
rs11511253	rs7088208	0.986906	0.993431	HSD17B7P2	ENSG00000099251.14	Whole Blood	T=0.814	C=0.186	0.337227	4.05164e-15
rs11511253	rs117840800	0.993439	1	HSD17B7P2	ENSG00000099251.14	Whole Blood	A=0.815	G=0.185	0.337227	4.05164e-15
rs11511253	rs74890899	0.986895	1	HSD17B7P2	ENSG00000099251.14	Whole Blood	C=0.816	T=0.184	0.337227	4.05164e-15
rs11511253	rs1810634	0.993439	1	HSD17B7P2	ENSG00000099251.14	Whole Blood	A=0.815	G=0.185	0.337227	4.05164e-15
rs11511253	rs9664768	0.993439	1	HSD17B7P2	ENSG00000099251.14	Whole Blood	G=0.815	A=0.185	0.337227	4.05164e-15
rs11511253	rs72639568	0.993439	1	HSD17B7P2	ENSG00000099251.14	Whole Blood	G=0.815	A=0.185	0.337227	4.05164e-15
rs11511253	rs77114817	0.986895	1	HSD17B7P2	ENSG00000099251.14	Whole Blood	T=0.816	C=0.184	0.337227	4.05164e-15
rs11511253	rs11492515	0.993439	1	HSD17B7P2	ENSG00000099251.14	Whole Blood	C=0.815	T=0.185	0.337227	4.05164e-15
rs11511253	rs11492459	0.993439	1	HSD17B7P2	ENSG00000099251.14	Whole Blood	T=0.815	C=0.185	0.337227	4.05164e-15
rs11511253	rs7084618	0.993439	1	HSD17B7P2	ENSG00000099251.14	Whole Blood	A=0.815	T=0.185	0.337227	4.05164e-15
rs11511253	rs7095113	0.993439	1	HSD17B7P2	ENSG00000099251.14	Whole Blood	G=0.815	A=0.185	0.337227	4.05164e-15
rs11511253	rs148773254	0.993439	1	HSD17B7P2	ENSG00000099251.14	Whole Blood	C=0.815	T=0.185	0.337227	4.05164e-15
rs11511253	rs12775030	0.993439	1	HSD17B7P2	ENSG00000099251.14	Whole Blood	C=0.815	T=0.185	0.337227	4.05164e-15
rs11511253	rs4623823	0.993439	1	HSD17B7P2	ENSG00000099251.14	Whole Blood	C=0.815	T=0.185	0.337227	4.05164e-15
rs11511253	rs35712971	0.993439	1	HSD17B7P2	ENSG00000099251.14	Whole Blood	A=0.815	T=0.185	0.337227	4.05164e-15
rs11511253	rs4572067	0.993439	1	HSD17B7P2	ENSG00000099251.14	Whole Blood	G=0.815	T=0.185	0.337227	4.05164e-15
rs11511253	rs11146911	1	1	HSD17B7P2	ENSG00000099251.14	Whole Blood	C=0.814	A=0.186	0.337227	4.05164e-15
rs11511253	rs7095128	0.993439	1	RP11-291L22.9	ENSG00000276805.2	Artery - Tibial	G=0.815	C=0.185	0.442864	4.17105e-15
rs11511253	rs11146869	0.993439	1	RP11-291L22.9	ENSG00000276805.2	Artery - Tibial	A=0.815	G=0.185	0.442864	4.17105e-15
rs11511253	rs61839284	0.993439	1	RP11-291L22.9	ENSG00000276805.2	Artery - Tibial	A=0.815	C=0.185	0.442864	4.17105e-15
rs11511253	rs34019437	0.993439	1	RP11-291L22.9	ENSG00000276805.2	Artery - Tibial	C=0.815	T=0.185	0.442864	4.17105e-15
rs11511253	rs4326715	0.993466	1	RP11-291L22.9	ENSG00000276805.2	Artery - Tibial	A=0.813	G=0.187	0.442864	4.17105e-15
rs11511253	rs2310210	0.980362	0.993396	RP11-291L22.9	ENSG00000276805.2	Artery - Tibial	G=0.815	A=0.185	0.442864	4.17105e-15
rs11511253	rs11146894	0.986895	1	HSD17B7P2	ENSG00000099251.14	Whole Blood	G=0.816	A=0.184	0.338606	4.23317e-15
rs11511253	rs10764157	0.980366	1	RP11-291L22.9	ENSG00000276805.2	Adipose - Subcutaneous	A=0.817	G=0.183	0.4473	4.29259e-15
rs11511253	rs2021018	0.980366	1	RP11-291L22.9	ENSG00000276805.2	Adipose - Subcutaneous	G=0.817	A=0.183	0.4473	4.29259e-15
rs11511253	rs7071245	0.980366	1	RP11-291L22.9	ENSG00000276805.2	Adipose - Subcutaneous	G=0.817	A=0.183	0.4473	4.29259e-15
rs11511253	rs10827863	0.980366	1	RP11-291L22.9	ENSG00000276805.2	Adipose - Subcutaneous	T=0.817	C=0.183	0.4473	4.29259e-15
rs11511253	rs11595308	1	1	HSD17B7P2	ENSG00000099251.14	Whole Blood	C=0.814	A=0.186	0.338058	4.32124e-15
rs11511253	rs11146621	0.993466	1	HSD17B7P2	ENSG00000099251.14	Whole Blood	G=0.813	A=0.187	0.338058	4.32124e-15
rs11511253	rs2310211	0.993466	1	HSD17B7P2	ENSG00000099251.14	Whole Blood	G=0.813	A=0.187	0.338058	4.32124e-15
rs11511253	rs3928516	0.993466	1	HSD17B7P2	ENSG00000099251.14	Whole Blood	G=0.813	T=0.187	0.336245	4.39746e-15
rs11511253	rs3970136	0.891125	0.993301	RP11-291L22.9	ENSG00000276805.2	Artery - Tibial	T=0.798	C=0.202	0.420893	4.55931e-15
rs11511253	rs11146675	0.891125	0.993301	RP11-291L22.9	ENSG00000276805.2	Artery - Tibial	G=0.798	T=0.202	0.420893	4.55931e-15
rs11511253	rs367919155	0.993439	1	HSD17B7P2	ENSG00000099251.14	Whole Blood	G=0.815	C=0.185	0.337775	4.60948e-15
rs11511253	rs11511253	1	1	HSD17B7P2	ENSG00000099251.14	Whole Blood	G=0.814	A=0.186	0.33896	5.03441e-15
rs11511253	rs11011546	0.986895	1	RP11-291L22.9	ENSG00000276805.2	Artery - Tibial	G=0.816	A=0.184	0.442824	5.64016e-15
rs11511253	rs74798172	0.879145	0.986601	RP11-291L22.9	ENSG00000276805.2	Adipose - Subcutaneous	C=0.798	G=0.202	0.416909	5.77249e-15
rs11511253	rs79613030	0.993439	1	HSD17B7P2	ENSG00000099251.14	Whole Blood	G=0.815	A=0.185	0.335365	5.96362e-15
rs11511253	rs61839484	0.993439	1	HSD17B7P2	ENSG00000099251.14	Whole Blood	G=0.815	A=0.185	0.335365	5.96362e-15
rs11511253	rs61837257	0.993439	1	RP11-291L22.9	ENSG00000276805.2	Cells - Cultured fibroblasts	C=0.815	G=0.185	0.472507	6.09975e-15
rs11511253	rs12571507	0.936072	0.980198	RP11-291L22.9	ENSG00000276805.2	Pancreas	C=0.81	T=0.19	0.631381	6.35006e-15
rs11511253	rs79613030	0.993439	1	RP11-291L22.9	ENSG00000276805.2	Cells - Cultured fibroblasts	G=0.815	A=0.185	0.468431	6.44099e-15
rs11511253	rs61839484	0.993439	1	RP11-291L22.9	ENSG00000276805.2	Cells - Cultured fibroblasts	G=0.815	A=0.185	0.468431	6.44099e-15
rs11511253	rs11592779	0.872669	0.979927	RP11-291L22.9	ENSG00000276805.2	Esophagus - Mucosa	C=0.799	T=0.201	0.411102	6.73122e-15
rs11511253	rs7923903	0.879145	0.986601	RP11-291L22.9	ENSG00000276805.2	Esophagus - Mucosa	G=0.798	A=0.202	0.411102	6.73122e-15
rs11511253	rs7896006	0.879145	0.986601	RP11-291L22.9	ENSG00000276805.2	Esophagus - Mucosa	C=0.798	T=0.202	0.411102	6.73122e-15
rs11511253	rs7896545	0.879145	0.986601	RP11-291L22.9	ENSG00000276805.2	Esophagus - Mucosa	C=0.798	T=0.202	0.411102	6.73122e-15
rs11511253	rs7076099	0.879145	0.986601	RP11-291L22.9	ENSG00000276805.2	Esophagus - Mucosa	G=0.798	A=0.202	0.411102	6.73122e-15
rs11511253	rs4881586	0.86621	0.973269	RP11-291L22.9	ENSG00000276805.2	Cells - Cultured fibroblasts	C=0.8	T=0.2	0.445171	6.76602e-15
rs11511253	rs11592779	0.872669	0.979927	RP11-291L22.9	ENSG00000276805.2	Cells - Cultured fibroblasts	C=0.799	T=0.201	0.442538	7.16719e-15
rs11511253	rs7923903	0.879145	0.986601	RP11-291L22.9	ENSG00000276805.2	Cells - Cultured fibroblasts	G=0.798	A=0.202	0.442538	7.16719e-15
rs11511253	rs7896006	0.879145	0.986601	RP11-291L22.9	ENSG00000276805.2	Cells - Cultured fibroblasts	C=0.798	T=0.202	0.442538	7.16719e-15
rs11511253	rs7896545	0.879145	0.986601	RP11-291L22.9	ENSG00000276805.2	Cells - Cultured fibroblasts	C=0.798	T=0.202	0.442538	7.16719e-15
rs11511253	rs7076099	0.879145	0.986601	RP11-291L22.9	ENSG00000276805.2	Cells - Cultured fibroblasts	G=0.798	A=0.202	0.442538	7.16719e-15
rs11511253	rs11595308	1	1	RP11-291L22.9	ENSG00000276805.2	Cells - Cultured fibroblasts	C=0.814	A=0.186	0.468916	7.70783e-15
rs11511253	rs11146621	0.993466	1	RP11-291L22.9	ENSG00000276805.2	Cells - Cultured fibroblasts	G=0.813	A=0.187	0.468916	7.70783e-15
rs11511253	rs2310211	0.993466	1	RP11-291L22.9	ENSG00000276805.2	Cells - Cultured fibroblasts	G=0.813	A=0.187	0.468916	7.70783e-15
rs11511253	rs11011501	0.967321	0.993324	RP11-291L22.9	ENSG00000276805.2	Adipose - Subcutaneous	G=0.817	A=0.183	0.444113	7.83426e-15
rs11511253	rs11011509	0.973833	0.99336	RP11-291L22.9	ENSG00000276805.2	Adipose - Subcutaneous	G=0.816	A=0.184	0.444113	7.83426e-15
rs11511253	rs7100199	0.96737	0.986792	RP11-291L22.9	ENSG00000276805.2	Adipose - Subcutaneous	T=0.815	C=0.185	0.444113	7.83426e-15
rs11511253	rs7099107	0.967718	0.993407	HSD17B7P2	ENSG00000099251.14	Whole Blood	G=0.811	A=0.189	0.334528	8.00162e-15
rs11511253	rs200220357	0.993439	1	HSD17B7P2	ENSG00000099251.14	Whole Blood	C=0.815	T=0.185	0.33792	8.10058e-15
rs11511253	rs3928516	0.993466	1	RP11-291L22.9	ENSG00000276805.2	Cells - Cultured fibroblasts	G=0.813	T=0.187	0.464742	8.65783e-15
rs11511253	rs35949805	0.896667	0.993309	RP11-291L22.9	ENSG00000276805.2	Adipose - Subcutaneous	G=0.799	A=0.201	0.416658	9.03017e-15
rs11511253	rs74798172	0.879145	0.986601	RP11-291L22.9	ENSG00000276805.2	Artery - Tibial	C=0.798	G=0.202	0.420891	9.03846e-15
rs11511253	rs4881586	0.86621	0.973269	RP11-291L22.9	ENSG00000276805.2	Esophagus - Mucosa	C=0.8	T=0.2	0.412504	9.189e-15
rs11511253	rs10870362	0.993466	1	RP11-291L22.9	ENSG00000276805.2	Artery - Tibial	G=0.813	A=0.187	0.443893	9.20558e-15
rs11511253	rs77578626	0.967718	0.993407	RP11-291L22.9	ENSG00000276805.2	Adipose - Subcutaneous	A=0.811	G=0.189	0.423411	9.60878e-15
rs11511253	rs2180800	0.980362	0.993396	HSD17B7P2	ENSG00000099251.14	Whole Blood	C=0.815	T=0.185	0.337307	9.64226e-15
rs11511253	rs11596501	0.986895	1	HSD17B7P2	ENSG00000099251.14	Whole Blood	G=0.816	A=0.184	0.337307	9.64226e-15
rs11511253	rs11011546	0.986895	1	HSD17B7P2	ENSG00000099251.14	Whole Blood	G=0.816	A=0.184	0.337307	9.64226e-15
rs11511253	rs10870362	0.993466	1	HSD17B7P2	ENSG00000099251.14	Whole Blood	G=0.813	A=0.187	0.34036	9.77701e-15
rs11511253	rs10764157	0.980366	1	HSD17B7P2	ENSG00000099251.14	Whole Blood	A=0.817	G=0.183	0.340444	9.77962e-15
rs11511253	rs2021018	0.980366	1	HSD17B7P2	ENSG00000099251.14	Whole Blood	G=0.817	A=0.183	0.340444	9.77962e-15
rs11511253	rs7071245	0.980366	1	HSD17B7P2	ENSG00000099251.14	Whole Blood	G=0.817	A=0.183	0.340444	9.77962e-15
rs11511253	rs10827863	0.980366	1	HSD17B7P2	ENSG00000099251.14	Whole Blood	T=0.817	C=0.183	0.340444	9.77962e-15
rs11511253	rs3970136	0.891125	0.993301	RP11-291L22.9	ENSG00000276805.2	Adipose - Subcutaneous	T=0.798	C=0.202	0.410915	9.83047e-15
rs11511253	rs11146675	0.891125	0.993301	RP11-291L22.9	ENSG00000276805.2	Adipose - Subcutaneous	G=0.798	T=0.202	0.410915	9.83047e-15
rs11511253	rs11011542	0.980366	1	HSD17B7P2	ENSG00000099251.14	Whole Blood	C=0.817	T=0.183	0.340848	9.8887e-15
rs11511253	rs11511253	1	1	RP11-291L22.9	ENSG00000276805.2	Cells - Cultured fibroblasts	G=0.814	A=0.186	0.471132	9.91517e-15
rs11511253	rs34458842	0.967718	0.993407	RP11-291L22.9	ENSG00000276805.2	Artery - Tibial	TG=0.811	T=0.189	0.438124	1.01808e-14
rs11511253	rs4070543	0.891125	0.993301	RP11-291L22.9	ENSG00000276805.2	Cells - Cultured fibroblasts	G=0.798	A=0.202	0.436958	1.04372e-14
rs11511253	rs4881618	0.993466	1	RP11-291L22.9	ENSG00000276805.2	Artery - Tibial	G=0.813	T=0.187	0.434084	1.07333e-14
rs11511253	rs77578626	0.967718	0.993407	RP11-291L22.9	ENSG00000276805.2	Artery - Tibial	A=0.811	G=0.189	0.425363	1.13942e-14
rs11511253	rs11011533	0.986895	1	RP11-291L22.9	ENSG00000276805.2	Cells - Cultured fibroblasts	G=0.816	A=0.184	0.465098	1.1517e-14
rs11511253	rs10827860	0.986895	1	RP11-291L22.9	ENSG00000276805.2	Cells - Cultured fibroblasts	G=0.816	A=0.184	0.465098	1.1517e-14
rs11511253	rs10827862	0.986895	1	RP11-291L22.9	ENSG00000276805.2	Cells - Cultured fibroblasts	C=0.816	A=0.184	0.465098	1.1517e-14
rs11511253	rs7917312	0.986895	1	RP11-291L22.9	ENSG00000276805.2	Cells - Cultured fibroblasts	C=0.816	T=0.184	0.465098	1.1517e-14
rs11511253	rs61839915	0.980362	0.993396	RP11-291L22.9	ENSG00000276805.2	Artery - Tibial	C=0.815	T=0.185	0.43818	1.17076e-14
rs11511253	rs7089593	0.980362	0.993396	RP11-291L22.9	ENSG00000276805.2	Artery - Tibial	A=0.815	G=0.185	0.43818	1.17076e-14
rs11511253	rs7089975	0.980362	0.993396	RP11-291L22.9	ENSG00000276805.2	Artery - Tibial	A=0.815	G=0.185	0.43818	1.17076e-14
rs11511253	rs11596501	0.986895	1	RP11-291L22.9	ENSG00000276805.2	Artery - Tibial	G=0.816	A=0.184	0.43818	1.17076e-14
rs11511253	rs11146699	0.967718	0.993407	RP11-291L22.9	ENSG00000276805.2	Adipose - Subcutaneous	G=0.811	A=0.189	0.436045	1.18528e-14
rs11511253	rs10870362	0.993466	1	RP11-291L22.9	ENSG00000276805.2	Cells - Cultured fibroblasts	G=0.813	A=0.187	0.47582	1.18733e-14
rs11511253	rs4070543	0.891125	0.993301	RP11-291L22.9	ENSG00000276805.2	Esophagus - Mucosa	G=0.798	A=0.202	0.405922	1.2036e-14
rs11511253	rs12571507	0.936072	0.980198	RP11-291L22.9	ENSG00000276805.2	Cells - Cultured fibroblasts	C=0.81	T=0.19	0.470834	1.27118e-14
rs11511253	rs11597330	0.974276	1	RP11-291L22.9	ENSG00000276805.2	Artery - Tibial	C=0.81	T=0.19	0.426854	1.33797e-14
rs11511253	rs11146775	0.967718	0.993407	RP11-291L22.9	ENSG00000276805.2	Adipose - Subcutaneous	C=0.811	T=0.189	0.444035	1.39035e-14
rs11511253	rs367919155	0.993439	1	RP11-291L22.9	ENSG00000276805.2	Cells - Cultured fibroblasts	G=0.815	C=0.185	0.464256	1.45307e-14
rs11511253	rs7089593	0.980362	0.993396	HSD17B7P2	ENSG00000099251.14	Whole Blood	A=0.815	G=0.185	0.335002	1.49969e-14
rs11511253	rs7089975	0.980362	0.993396	HSD17B7P2	ENSG00000099251.14	Whole Blood	A=0.815	G=0.185	0.335002	1.49969e-14
rs11511253	rs7095128	0.993439	1	HSD17B7P2	ENSG00000099251.14	Whole Blood	G=0.815	C=0.185	0.334088	1.51162e-14
rs11511253	rs11011501	0.967321	0.993324	HSD17B7P2	ENSG00000099251.14	Whole Blood	G=0.817	A=0.183	0.338163	1.51763e-14
rs11511253	rs11011509	0.973833	0.99336	HSD17B7P2	ENSG00000099251.14	Whole Blood	G=0.816	A=0.184	0.338163	1.51763e-14
rs11511253	rs7100199	0.96737	0.986792	HSD17B7P2	ENSG00000099251.14	Whole Blood	T=0.815	C=0.185	0.338163	1.51763e-14
rs11511253	rs4881618	0.993466	1	RP11-291L22.9	ENSG00000276805.2	Cells - Cultured fibroblasts	G=0.813	T=0.187	0.467678	1.54237e-14
rs11511253	rs12571507	0.936072	0.980198	RP11-291L22.9	ENSG00000276805.2	Adipose - Subcutaneous	C=0.81	T=0.19	0.43169	1.55771e-14
rs11511253	rs11146655	0.961177	0.986831	RP11-291L22.9	ENSG00000276805.2	Artery - Tibial	A=0.812	G=0.188	0.441329	1.55816e-14
rs11511253	rs11812823	0.986895	1	HSD17B7P2	ENSG00000099251.14	Whole Blood	T=0.816	C=0.184	0.336945	1.57128e-14
rs11511253	rs112309001	0.986895	1	HSD17B7P2	ENSG00000099251.14	Whole Blood	AG=0.816	A=0.184	0.336945	1.57128e-14
rs11511253	rs2012084	0.973898	0.986863	HSD17B7P2	ENSG00000099251.14	Whole Blood	T=0.814	C=0.186	0.336945	1.57128e-14
rs11511253	rs35747454	0.986895	1	HSD17B7P2	ENSG00000099251.14	Whole Blood	G=0.816	T=0.184	0.336945	1.57128e-14
rs11511253	rs12354584	0.986895	1	HSD17B7P2	ENSG00000099251.14	Whole Blood	G=0.816	T=0.184	0.336945	1.57128e-14
rs11511253	rs11511148	0.986895	1	HSD17B7P2	ENSG00000099251.14	Whole Blood	C=0.816	T=0.184	0.336945	1.57128e-14
rs11511253	rs11011567	0.986895	1	HSD17B7P2	ENSG00000099251.14	Whole Blood	A=0.816	G=0.184	0.336945	1.57128e-14
rs11511253	rs28413086	0.986895	1	HSD17B7P2	ENSG00000099251.14	Whole Blood	T=0.816	G=0.184	0.336945	1.57128e-14
rs11511253	rs35451472	0.986895	1	HSD17B7P2	ENSG00000099251.14	Whole Blood	C=0.816	T=0.184	0.336945	1.57128e-14
rs11511253	rs4881586	0.86621	0.973269	HSD17B7P2	ENSG00000099251.14	Whole Blood	C=0.8	T=0.2	0.313946	1.63106e-14
rs11511253	rs12775411	0.95526	0.993391	HSD17B7P2	ENSG00000099251.14	Whole Blood	G=0.809	A=0.191	0.330979	1.63616e-14
rs11511253	rs7087510	0.891125	0.993301	RP11-291L22.9	ENSG00000276805.2	Cells - Cultured fibroblasts	G=0.798	A=0.202	0.436221	1.65978e-14
rs11511253	rs138310998	0.891125	0.993301	RP11-291L22.9	ENSG00000276805.2	Cells - Cultured fibroblasts	G=0.798	A=0.202	0.436221	1.65978e-14
rs11511253	rs7069025	0.891125	0.993301	RP11-291L22.9	ENSG00000276805.2	Cells - Cultured fibroblasts	G=0.798	A=0.202	0.436221	1.65978e-14
rs11511253	rs12770432	0.891125	0.993301	RP11-291L22.9	ENSG00000276805.2	Cells - Cultured fibroblasts	G=0.798	A=0.202	0.436221	1.65978e-14
rs11511253	rs11817950	0.954916	0.986815	HSD17B7P2	ENSG00000099251.14	Whole Blood	C=0.811	T=0.189	0.328305	1.74755e-14
rs11511253	rs11146699	0.967718	0.993407	RP11-291L22.9	ENSG00000276805.2	Artery - Tibial	G=0.811	A=0.189	0.433735	1.77042e-14
rs11511253	rs12571329	0.891125	0.993301	RP11-291L22.9	ENSG00000276805.2	Cells - Cultured fibroblasts	G=0.798	A=0.202	0.435039	1.86488e-14
rs11511253	rs11146775	0.967718	0.993407	HSD17B7P2	ENSG00000099251.14	Whole Blood	C=0.811	T=0.189	0.339998	1.88247e-14
rs11511253	rs4088497	0.993466	1	RP11-291L22.9	ENSG00000276805.2	Cells - Cultured fibroblasts	T=0.813	C=0.187	0.466305	1.8847e-14
rs11511253	rs4881618	0.993466	1	HSD17B7P2	ENSG00000099251.14	Whole Blood	G=0.813	T=0.187	0.331687	1.89392e-14
rs11511253	rs1902549	0.967718	0.993407	HSD17B7P2	ENSG00000099251.14	Whole Blood	C=0.811	T=0.189	0.332405	1.91746e-14
rs11511253	rs12773561	0.967718	0.993407	HSD17B7P2	ENSG00000099251.14	Whole Blood	G=0.811	C=0.189	0.328403	1.93391e-14
rs11511253	rs11146869	0.993439	1	HSD17B7P2	ENSG00000099251.14	Whole Blood	A=0.815	G=0.185	0.332968	1.936e-14
rs11511253	rs61839284	0.993439	1	HSD17B7P2	ENSG00000099251.14	Whole Blood	A=0.815	C=0.185	0.332968	1.936e-14
rs11511253	rs34019437	0.993439	1	HSD17B7P2	ENSG00000099251.14	Whole Blood	C=0.815	T=0.185	0.332968	1.936e-14
rs11511253	rs4326715	0.993466	1	HSD17B7P2	ENSG00000099251.14	Whole Blood	A=0.813	G=0.187	0.332968	1.936e-14
rs11511253	rs2310210	0.980362	0.993396	HSD17B7P2	ENSG00000099251.14	Whole Blood	G=0.815	A=0.185	0.332968	1.936e-14
rs11511253	rs34873071	0.986895	1	HSD17B7P2	ENSG00000099251.14	Whole Blood	G=0.816	T=0.184	0.335765	2.02418e-14
rs11511253	rs58673518	0.986895	1	HSD17B7P2	ENSG00000099251.14	Whole Blood	G=0.816	T=0.184	0.335765	2.02418e-14
rs11511253	rs2085430	0.993439	1	HSD17B7P2	ENSG00000099251.14	Whole Blood	C=0.815	G=0.185	0.335765	2.02418e-14
rs11511253	rs10870459	0.986895	1	HSD17B7P2	ENSG00000099251.14	Whole Blood	A=0.816	G=0.184	0.335765	2.02418e-14
rs11511253	rs11146613	0.993439	1	HSD17B7P2	ENSG00000099251.14	Whole Blood	C=0.815	T=0.185	0.335765	2.02418e-14
rs11511253	rs182246855	0.973833	0.99336	HSD17B7P2	ENSG00000099251.14	Whole Blood	G=0.816	A=0.184	0.335765	2.02418e-14
rs11511253	rs12359136	0.986906	0.993431	HSD17B7P2	ENSG00000099251.14	Whole Blood	A=0.814	T=0.186	0.335765	2.02418e-14
rs11511253	rs11146640	0.993439	1	HSD17B7P2	ENSG00000099251.14	Whole Blood	G=0.815	A=0.185	0.335765	2.02418e-14
rs11511253	rs7068733	0.948142	0.973726	HSD17B7P2	ENSG00000099251.14	Whole Blood	C=0.814	G=0.186	0.329214	2.04476e-14
rs11511253	rs4088497	0.993466	1	HSD17B7P2	ENSG00000099251.14	Whole Blood	T=0.813	C=0.187	0.332589	2.07223e-14
rs11511253	rs61839915	0.980362	0.993396	HSD17B7P2	ENSG00000099251.14	Whole Blood	C=0.815	T=0.185	0.333215	2.09674e-14
rs11511253	rs7074243	0.961456	0.993399	HSD17B7P2	ENSG00000099251.14	Whole Blood	A=0.81	T=0.19	0.329093	2.1886e-14
rs11511253	rs7068365	0.967718	0.993407	HSD17B7P2	ENSG00000099251.14	Whole Blood	C=0.811	T=0.189	0.329093	2.1886e-14
rs11511253	rs11146768	0.967718	0.993407	HSD17B7P2	ENSG00000099251.14	Whole Blood	C=0.811	T=0.189	0.329093	2.1886e-14
rs11511253	rs7070930	0.986895	1	HSD17B7P2	ENSG00000099251.14	Whole Blood	G=0.816	C=0.184	0.333186	2.20448e-14
rs11511253	rs80081575	0.986895	1	HSD17B7P2	ENSG00000099251.14	Whole Blood	G=0.816	A=0.184	0.333186	2.20448e-14
rs11511253	rs35361303	0.961177	0.986831	HSD17B7P2	ENSG00000099251.14	Whole Blood	C=0.812	G=0.188	0.331598	2.33841e-14
rs11511253	rs7081059	0.961177	0.986831	HSD17B7P2	ENSG00000099251.14	Whole Blood	C=0.812	A=0.188	0.331598	2.33841e-14
rs11511253	rs35173665	0.948722	0.986798	HSD17B7P2	ENSG00000099251.14	Whole Blood	T=0.81	G=0.19	0.331598	2.33841e-14
rs11511253	rs7068771	0.961177	0.986831	HSD17B7P2	ENSG00000099251.14	Whole Blood	T=0.812	G=0.188	0.331598	2.33841e-14
rs11511253	rs2180800	0.980362	0.993396	RP11-291L22.9	ENSG00000276805.2	Artery - Tibial	C=0.815	T=0.185	0.431817	2.38696e-14
rs11511253	rs11146654	0.967718	0.993407	HSD17B7P2	ENSG00000099251.14	Whole Blood	C=0.811	T=0.189	0.329397	2.39454e-14
rs11511253	rs9731107	0.967718	0.993407	HSD17B7P2	ENSG00000099251.14	Whole Blood	G=0.811	A=0.189	0.329397	2.39454e-14
rs11511253	rs7071794	0.967718	0.993407	HSD17B7P2	ENSG00000099251.14	Whole Blood	T=0.811	A=0.189	0.329397	2.39454e-14
rs11511253	rs11146702	0.967718	0.993407	HSD17B7P2	ENSG00000099251.14	Whole Blood	G=0.811	A=0.189	0.329397	2.39454e-14
rs11511253	rs11146709	0.967718	0.993407	HSD17B7P2	ENSG00000099251.14	Whole Blood	C=0.811	T=0.189	0.329397	2.39454e-14
rs11511253	rs11146713	0.967718	0.993407	HSD17B7P2	ENSG00000099251.14	Whole Blood	G=0.811	T=0.189	0.329397	2.39454e-14
rs11511253	rs11597575	0.967718	0.993407	HSD17B7P2	ENSG00000099251.14	Whole Blood	G=0.811	C=0.189	0.329397	2.39454e-14
rs11511253	rs10870406	0.967718	0.993407	HSD17B7P2	ENSG00000099251.14	Whole Blood	G=0.811	A=0.189	0.329397	2.39454e-14
rs11511253	rs4881578	0.967718	0.993407	HSD17B7P2	ENSG00000099251.14	Whole Blood	G=0.811	A=0.189	0.329397	2.39454e-14
rs11511253	rs4881584	0.967718	0.993407	HSD17B7P2	ENSG00000099251.14	Whole Blood	C=0.811	T=0.189	0.329397	2.39454e-14
rs11511253	rs11146753	0.967718	0.993407	HSD17B7P2	ENSG00000099251.14	Whole Blood	A=0.811	G=0.189	0.329397	2.39454e-14
rs11511253	rs10870421	0.967718	0.993407	HSD17B7P2	ENSG00000099251.14	Whole Blood	C=0.811	A=0.189	0.329397	2.39454e-14
rs11511253	rs11146784	0.961456	0.993399	HSD17B7P2	ENSG00000099251.14	Whole Blood	C=0.81	T=0.19	0.329397	2.39454e-14
rs11511253	rs12357698	0.967718	0.993407	HSD17B7P2	ENSG00000099251.14	Whole Blood	T=0.811	A=0.189	0.329397	2.39454e-14
rs11511253	rs4556804	0.967718	0.993407	HSD17B7P2	ENSG00000099251.14	Whole Blood	G=0.811	A=0.189	0.329397	2.39454e-14
rs11511253	rs7076118	0.986895	1	HSD17B7P2	ENSG00000099251.14	Whole Blood	C=0.816	A=0.184	0.332532	2.51307e-14
rs11511253	rs12772118	0.961177	0.986831	HSD17B7P2	ENSG00000099251.14	Whole Blood	T=0.812	G=0.188	0.33202	2.53356e-14
rs11511253	rs9664979	0.961177	0.986831	HSD17B7P2	ENSG00000099251.14	Whole Blood	G=0.812	A=0.188	0.33202	2.53356e-14
rs11511253	rs7910228	0.961177	0.986831	HSD17B7P2	ENSG00000099251.14	Whole Blood	A=0.812	T=0.188	0.33202	2.53356e-14
rs11511253	rs11592779	0.872669	0.979927	HSD17B7P2	ENSG00000099251.14	Whole Blood	C=0.799	T=0.201	0.309966	2.56744e-14
rs11511253	rs7923903	0.879145	0.986601	HSD17B7P2	ENSG00000099251.14	Whole Blood	G=0.798	A=0.202	0.309966	2.56744e-14
rs11511253	rs7896006	0.879145	0.986601	HSD17B7P2	ENSG00000099251.14	Whole Blood	C=0.798	T=0.202	0.309966	2.56744e-14
rs11511253	rs7896545	0.879145	0.986601	HSD17B7P2	ENSG00000099251.14	Whole Blood	C=0.798	T=0.202	0.309966	2.56744e-14
rs11511253	rs7076099	0.879145	0.986601	HSD17B7P2	ENSG00000099251.14	Whole Blood	G=0.798	A=0.202	0.309966	2.56744e-14
rs11511253	rs7074243	0.961456	0.993399	RP11-291L22.9	ENSG00000276805.2	Cells - Cultured fibroblasts	A=0.81	T=0.19	0.459107	2.56911e-14
rs11511253	rs7068365	0.967718	0.993407	RP11-291L22.9	ENSG00000276805.2	Cells - Cultured fibroblasts	C=0.811	T=0.189	0.459107	2.56911e-14
rs11511253	rs11146768	0.967718	0.993407	RP11-291L22.9	ENSG00000276805.2	Cells - Cultured fibroblasts	C=0.811	T=0.189	0.459107	2.56911e-14
rs11511253	rs144280981	0.986906	0.993431	RP11-291L22.9	ENSG00000276805.2	Esophagus - Mucosa	C=0.814	T=0.186	0.423498	2.62734e-14
rs11511253	rs7093896	0.993439	1	RP11-291L22.9	ENSG00000276805.2	Esophagus - Mucosa	A=0.815	T=0.185	0.423498	2.62734e-14
rs11511253	rs3087759	0.993439	1	RP11-291L22.9	ENSG00000276805.2	Esophagus - Mucosa	A=0.815	C=0.185	0.423498	2.62734e-14
rs11511253	rs4934946	0.993439	1	RP11-291L22.9	ENSG00000276805.2	Esophagus - Mucosa	T=0.815	C=0.185	0.423498	2.62734e-14
rs11511253	rs11011555	0.993439	1	RP11-291L22.9	ENSG00000276805.2	Esophagus - Mucosa	T=0.815	C=0.185	0.423498	2.62734e-14
rs11511253	rs61837224	0.993439	1	RP11-291L22.9	ENSG00000276805.2	Esophagus - Mucosa	G=0.815	C=0.185	0.423498	2.62734e-14
rs11511253	rs117398853	0.993439	1	RP11-291L22.9	ENSG00000276805.2	Esophagus - Mucosa	C=0.815	G=0.185	0.423498	2.62734e-14
rs11511253	rs9663128	0.993439	1	RP11-291L22.9	ENSG00000276805.2	Esophagus - Mucosa	C=0.815	G=0.185	0.423498	2.62734e-14
rs11511253	rs7088208	0.986906	0.993431	RP11-291L22.9	ENSG00000276805.2	Esophagus - Mucosa	T=0.814	C=0.186	0.423498	2.62734e-14
rs11511253	rs117840800	0.993439	1	RP11-291L22.9	ENSG00000276805.2	Esophagus - Mucosa	A=0.815	G=0.185	0.423498	2.62734e-14
rs11511253	rs74890899	0.986895	1	RP11-291L22.9	ENSG00000276805.2	Esophagus - Mucosa	C=0.816	T=0.184	0.423498	2.62734e-14
rs11511253	rs1810634	0.993439	1	RP11-291L22.9	ENSG00000276805.2	Esophagus - Mucosa	A=0.815	G=0.185	0.423498	2.62734e-14
rs11511253	rs9664768	0.993439	1	RP11-291L22.9	ENSG00000276805.2	Esophagus - Mucosa	G=0.815	A=0.185	0.423498	2.62734e-14
rs11511253	rs72639568	0.993439	1	RP11-291L22.9	ENSG00000276805.2	Esophagus - Mucosa	G=0.815	A=0.185	0.423498	2.62734e-14
rs11511253	rs77114817	0.986895	1	RP11-291L22.9	ENSG00000276805.2	Esophagus - Mucosa	T=0.816	C=0.184	0.423498	2.62734e-14
rs11511253	rs11492515	0.993439	1	RP11-291L22.9	ENSG00000276805.2	Esophagus - Mucosa	C=0.815	T=0.185	0.423498	2.62734e-14
rs11511253	rs11492459	0.993439	1	RP11-291L22.9	ENSG00000276805.2	Esophagus - Mucosa	T=0.815	C=0.185	0.423498	2.62734e-14
rs11511253	rs200253039	0.993439	1	RP11-291L22.9	ENSG00000276805.2	Esophagus - Mucosa	C=0.815	T=0.185	0.423498	2.62734e-14
rs11511253	rs7084618	0.993439	1	RP11-291L22.9	ENSG00000276805.2	Esophagus - Mucosa	A=0.815	T=0.185	0.423498	2.62734e-14
rs11511253	rs7095113	0.993439	1	RP11-291L22.9	ENSG00000276805.2	Esophagus - Mucosa	G=0.815	A=0.185	0.423498	2.62734e-14
rs11511253	rs148773254	0.993439	1	RP11-291L22.9	ENSG00000276805.2	Esophagus - Mucosa	C=0.815	T=0.185	0.423498	2.62734e-14
rs11511253	rs4623823	0.993439	1	RP11-291L22.9	ENSG00000276805.2	Esophagus - Mucosa	C=0.815	T=0.185	0.423498	2.62734e-14
rs11511253	rs35712971	0.993439	1	RP11-291L22.9	ENSG00000276805.2	Esophagus - Mucosa	A=0.815	T=0.185	0.423498	2.62734e-14
rs11511253	rs4572067	0.993439	1	RP11-291L22.9	ENSG00000276805.2	Esophagus - Mucosa	G=0.815	T=0.185	0.423498	2.62734e-14
rs11511253	rs11146911	1	1	RP11-291L22.9	ENSG00000276805.2	Esophagus - Mucosa	C=0.814	A=0.186	0.423498	2.62734e-14
rs11511253	rs9794215	0.967718	0.993407	HSD17B7P2	ENSG00000099251.14	Whole Blood	C=0.811	T=0.189	0.332717	2.72675e-14
rs11511253	rs11146655	0.961177	0.986831	HSD17B7P2	ENSG00000099251.14	Whole Blood	A=0.812	G=0.188	0.333329	2.76763e-14
rs11511253	rs35361303	0.961177	0.986831	RP11-291L22.9	ENSG00000276805.2	Artery - Tibial	C=0.812	G=0.188	0.432249	2.92283e-14
rs11511253	rs35173665	0.948722	0.986798	RP11-291L22.9	ENSG00000276805.2	Artery - Tibial	T=0.81	G=0.19	0.432249	2.92283e-14
rs11511253	rs7068771	0.961177	0.986831	RP11-291L22.9	ENSG00000276805.2	Artery - Tibial	T=0.812	G=0.188	0.432249	2.92283e-14
rs11511253	rs7087510	0.891125	0.993301	RP11-291L22.9	ENSG00000276805.2	Esophagus - Mucosa	G=0.798	A=0.202	0.402098	2.96241e-14
rs11511253	rs138310998	0.891125	0.993301	RP11-291L22.9	ENSG00000276805.2	Esophagus - Mucosa	G=0.798	A=0.202	0.402098	2.96241e-14
rs11511253	rs12571329	0.891125	0.993301	RP11-291L22.9	ENSG00000276805.2	Esophagus - Mucosa	G=0.798	A=0.202	0.402098	2.96241e-14
rs11511253	rs7069025	0.891125	0.993301	RP11-291L22.9	ENSG00000276805.2	Esophagus - Mucosa	G=0.798	A=0.202	0.402098	2.96241e-14
rs11511253	rs12770432	0.891125	0.993301	RP11-291L22.9	ENSG00000276805.2	Esophagus - Mucosa	G=0.798	A=0.202	0.402098	2.96241e-14
rs11511253	rs12772118	0.961177	0.986831	RP11-291L22.9	ENSG00000276805.2	Artery - Tibial	T=0.812	G=0.188	0.433774	3.08128e-14
rs11511253	rs9664979	0.961177	0.986831	RP11-291L22.9	ENSG00000276805.2	Artery - Tibial	G=0.812	A=0.188	0.433774	3.08128e-14
rs11511253	rs10870418	0.961177	0.986831	RP11-291L22.9	ENSG00000276805.2	Artery - Tibial	C=0.812	T=0.188	0.433774	3.08128e-14
rs11511253	rs7910228	0.961177	0.986831	RP11-291L22.9	ENSG00000276805.2	Artery - Tibial	A=0.812	T=0.188	0.433774	3.08128e-14
rs11511253	rs4881585	0.961177	0.986831	RP11-291L22.9	ENSG00000276805.2	Artery - Tibial	A=0.812	G=0.188	0.433774	3.08128e-14
rs11511253	rs12570560	0.891125	0.993301	RP11-291L22.9	ENSG00000276805.2	Esophagus - Mucosa	C=0.798	G=0.202	0.402436	3.13618e-14
rs11511253	rs2310280	0.986895	1	HSD17B7P2	ENSG00000099251.14	Whole Blood	A=0.816	G=0.184	0.333825	3.20477e-14
rs11511253	rs11146877	0.986895	1	HSD17B7P2	ENSG00000099251.14	Whole Blood	C=0.816	T=0.184	0.333825	3.20477e-14
rs11511253	rs11146894	0.986895	1	RP11-291L22.9	ENSG00000276805.2	Esophagus - Mucosa	G=0.816	A=0.184	0.424194	3.27392e-14
rs11511253	rs34458842	0.967718	0.993407	RP11-291L22.9	ENSG00000276805.2	Cells - Cultured fibroblasts	TG=0.811	T=0.189	0.459601	3.28492e-14
rs11511253	rs7099107	0.967718	0.993407	RP11-291L22.9	ENSG00000276805.2	Cells - Cultured fibroblasts	G=0.811	A=0.189	0.458947	3.39345e-14
rs11511253	rs11146654	0.967718	0.993407	RP11-291L22.9	ENSG00000276805.2	Cells - Cultured fibroblasts	C=0.811	T=0.189	0.457778	3.41745e-14
rs11511253	rs9731107	0.967718	0.993407	RP11-291L22.9	ENSG00000276805.2	Cells - Cultured fibroblasts	G=0.811	A=0.189	0.457778	3.41745e-14
rs11511253	rs7071794	0.967718	0.993407	RP11-291L22.9	ENSG00000276805.2	Cells - Cultured fibroblasts	T=0.811	A=0.189	0.457778	3.41745e-14
rs11511253	rs11146702	0.967718	0.993407	RP11-291L22.9	ENSG00000276805.2	Cells - Cultured fibroblasts	G=0.811	A=0.189	0.457778	3.41745e-14
rs11511253	rs11146709	0.967718	0.993407	RP11-291L22.9	ENSG00000276805.2	Cells - Cultured fibroblasts	C=0.811	T=0.189	0.457778	3.41745e-14
rs11511253	rs11146713	0.967718	0.993407	RP11-291L22.9	ENSG00000276805.2	Cells - Cultured fibroblasts	G=0.811	T=0.189	0.457778	3.41745e-14
rs11511253	rs7068733	0.948142	0.973726	RP11-291L22.9	ENSG00000276805.2	Cells - Cultured fibroblasts	C=0.814	G=0.186	0.457778	3.41745e-14
rs11511253	rs11597575	0.967718	0.993407	RP11-291L22.9	ENSG00000276805.2	Cells - Cultured fibroblasts	G=0.811	C=0.189	0.457778	3.41745e-14
rs11511253	rs10870406	0.967718	0.993407	RP11-291L22.9	ENSG00000276805.2	Cells - Cultured fibroblasts	G=0.811	A=0.189	0.457778	3.41745e-14
rs11511253	rs4881578	0.967718	0.993407	RP11-291L22.9	ENSG00000276805.2	Cells - Cultured fibroblasts	G=0.811	A=0.189	0.457778	3.41745e-14
rs11511253	rs4881584	0.967718	0.993407	RP11-291L22.9	ENSG00000276805.2	Cells - Cultured fibroblasts	C=0.811	T=0.189	0.457778	3.41745e-14
rs11511253	rs11146753	0.967718	0.993407	RP11-291L22.9	ENSG00000276805.2	Cells - Cultured fibroblasts	A=0.811	G=0.189	0.457778	3.41745e-14
rs11511253	rs10870421	0.967718	0.993407	RP11-291L22.9	ENSG00000276805.2	Cells - Cultured fibroblasts	C=0.811	A=0.189	0.457778	3.41745e-14
rs11511253	rs11146784	0.961456	0.993399	RP11-291L22.9	ENSG00000276805.2	Cells - Cultured fibroblasts	C=0.81	T=0.19	0.457778	3.41745e-14
rs11511253	rs12357698	0.967718	0.993407	RP11-291L22.9	ENSG00000276805.2	Cells - Cultured fibroblasts	T=0.811	A=0.189	0.457778	3.41745e-14
rs11511253	rs4556804	0.967718	0.993407	RP11-291L22.9	ENSG00000276805.2	Cells - Cultured fibroblasts	G=0.811	A=0.189	0.457778	3.41745e-14
rs11511253	rs61840410	0.891125	0.993301	RP11-291L22.9	ENSG00000276805.2	Cells - Cultured fibroblasts	C=0.798	T=0.202	0.43428	3.44152e-14
rs11511253	rs11011533	0.986895	1	RP11-291L22.9	ENSG00000276805.2	Esophagus - Mucosa	G=0.816	A=0.184	0.420649	3.4839e-14
rs11511253	rs10827860	0.986895	1	RP11-291L22.9	ENSG00000276805.2	Esophagus - Mucosa	G=0.816	A=0.184	0.420649	3.4839e-14
rs11511253	rs10827862	0.986895	1	RP11-291L22.9	ENSG00000276805.2	Esophagus - Mucosa	C=0.816	A=0.184	0.420649	3.4839e-14
rs11511253	rs7917312	0.986895	1	RP11-291L22.9	ENSG00000276805.2	Esophagus - Mucosa	C=0.816	T=0.184	0.420649	3.4839e-14
rs11511253	rs11011543	0.986895	1	RP11-291L22.9	ENSG00000276805.2	Esophagus - Mucosa	A=0.816	T=0.184	0.420649	3.4839e-14
rs11511253	rs10827866	0.986895	1	RP11-291L22.9	ENSG00000276805.2	Esophagus - Mucosa	G=0.816	T=0.184	0.420649	3.4839e-14
rs11511253	rs66610970	0.986895	1	RP11-291L22.9	ENSG00000276805.2	Esophagus - Mucosa	CT=0.816	C=0.184	0.420649	3.4839e-14
rs11511253	rs138284504	0.986895	1	RP11-291L22.9	ENSG00000276805.2	Esophagus - Mucosa	C=0.816	T=0.184	0.420649	3.4839e-14
rs11511253	rs10827867	0.986895	1	RP11-291L22.9	ENSG00000276805.2	Esophagus - Mucosa	T=0.816	C=0.184	0.420649	3.4839e-14
rs11511253	rs12571329	0.891125	0.993301	HSD17B7P2	ENSG00000099251.14	Whole Blood	G=0.798	A=0.202	0.308262	3.4879e-14
rs11511253	rs10870418	0.961177	0.986831	HSD17B7P2	ENSG00000099251.14	Whole Blood	C=0.812	T=0.188	0.330128	3.66485e-14
rs11511253	rs4881585	0.961177	0.986831	HSD17B7P2	ENSG00000099251.14	Whole Blood	A=0.812	G=0.188	0.330128	3.66485e-14
rs11511253	rs11011558	0.993439	1	RP11-291L22.9	ENSG00000276805.2	Pancreas	G=0.815	A=0.185	0.603741	3.76973e-14
rs11511253	rs200220357	0.993439	1	RP11-291L22.9	ENSG00000276805.2	Cells - Cultured fibroblasts	C=0.815	T=0.185	0.463247	3.79594e-14
rs11511253	rs7095128	0.993439	1	RP11-291L22.9	ENSG00000276805.2	Cells - Cultured fibroblasts	G=0.815	C=0.185	0.463247	3.79594e-14
rs11511253	rs11146869	0.993439	1	RP11-291L22.9	ENSG00000276805.2	Cells - Cultured fibroblasts	A=0.815	G=0.185	0.463247	3.79594e-14
rs11511253	rs61839284	0.993439	1	RP11-291L22.9	ENSG00000276805.2	Cells - Cultured fibroblasts	A=0.815	C=0.185	0.463247	3.79594e-14
rs11511253	rs34019437	0.993439	1	RP11-291L22.9	ENSG00000276805.2	Cells - Cultured fibroblasts	C=0.815	T=0.185	0.463247	3.79594e-14
rs11511253	rs4326715	0.993466	1	RP11-291L22.9	ENSG00000276805.2	Cells - Cultured fibroblasts	A=0.813	G=0.187	0.463247	3.79594e-14
rs11511253	rs2310210	0.980362	0.993396	RP11-291L22.9	ENSG00000276805.2	Cells - Cultured fibroblasts	G=0.815	A=0.185	0.463247	3.79594e-14
rs11511253	rs1902549	0.967718	0.993407	RP11-291L22.9	ENSG00000276805.2	Cells - Cultured fibroblasts	C=0.811	T=0.189	0.460586	3.83564e-14
rs11511253	rs7089032	0.967718	0.993407	RP11-291L22.9	ENSG00000276805.2	Artery - Tibial	G=0.811	T=0.189	0.436311	3.84864e-14
rs11511253	rs7087510	0.891125	0.993301	HSD17B7P2	ENSG00000099251.14	Whole Blood	G=0.798	A=0.202	0.30761	3.99561e-14
rs11511253	rs138310998	0.891125	0.993301	HSD17B7P2	ENSG00000099251.14	Whole Blood	G=0.798	A=0.202	0.30761	3.99561e-14
rs11511253	rs7069025	0.891125	0.993301	HSD17B7P2	ENSG00000099251.14	Whole Blood	G=0.798	A=0.202	0.30761	3.99561e-14
rs11511253	rs12770432	0.891125	0.993301	HSD17B7P2	ENSG00000099251.14	Whole Blood	G=0.798	A=0.202	0.30761	3.99561e-14
rs11511253	rs12570560	0.891125	0.993301	RP11-291L22.9	ENSG00000276805.2	Cells - Cultured fibroblasts	C=0.798	G=0.202	0.429847	4.10489e-14
rs11511253	rs7081059	0.961177	0.986831	RP11-291L22.9	ENSG00000276805.2	Artery - Tibial	C=0.812	A=0.188	0.429671	4.11946e-14
rs11511253	rs79613030	0.993439	1	RP11-291L22.9	ENSG00000276805.2	Esophagus - Mucosa	G=0.815	A=0.185	0.420238	4.12596e-14
rs11511253	rs61839484	0.993439	1	RP11-291L22.9	ENSG00000276805.2	Esophagus - Mucosa	G=0.815	A=0.185	0.420238	4.12596e-14
rs11511253	rs12773561	0.967718	0.993407	RP11-291L22.9	ENSG00000276805.2	Cells - Cultured fibroblasts	G=0.811	C=0.189	0.452335	4.22194e-14
rs11511253	rs149200693	0.961177	0.986831	RP11-291L22.9	ENSG00000276805.2	Adipose - Subcutaneous	G=0.812	C=0.188	0.431728	4.23543e-14
rs11511253	rs372035840	0.961177	0.986831	RP11-291L22.9	ENSG00000276805.2	Adipose - Subcutaneous	AC=0.812	A=0.188	0.431728	4.23543e-14
rs11511253	rs10870371	0.961177	0.986831	RP11-291L22.9	ENSG00000276805.2	Adipose - Subcutaneous	G=0.812	A=0.188	0.431728	4.23543e-14
rs11511253	rs11146655	0.961177	0.986831	RP11-291L22.9	ENSG00000276805.2	Cells - Cultured fibroblasts	A=0.812	G=0.188	0.466037	4.25178e-14
rs11511253	rs11011546	0.986895	1	RP11-291L22.9	ENSG00000276805.2	Cells - Cultured fibroblasts	G=0.816	A=0.184	0.461997	4.46492e-14
rs11511253	rs35361303	0.961177	0.986831	RP11-291L22.9	ENSG00000276805.2	Cells - Cultured fibroblasts	C=0.812	G=0.188	0.461757	4.55925e-14
rs11511253	rs7081059	0.961177	0.986831	RP11-291L22.9	ENSG00000276805.2	Cells - Cultured fibroblasts	C=0.812	A=0.188	0.461757	4.55925e-14
rs11511253	rs35173665	0.948722	0.986798	RP11-291L22.9	ENSG00000276805.2	Cells - Cultured fibroblasts	T=0.81	G=0.19	0.461757	4.55925e-14
rs11511253	rs7068771	0.961177	0.986831	RP11-291L22.9	ENSG00000276805.2	Cells - Cultured fibroblasts	T=0.812	G=0.188	0.461757	4.55925e-14
rs11511253	rs12775030	0.993439	1	RP11-291L22.9	ENSG00000276805.2	Esophagus - Mucosa	C=0.815	T=0.185	0.420324	4.56451e-14
rs11511253	rs61840410	0.891125	0.993301	HSD17B7P2	ENSG00000099251.14	Whole Blood	C=0.798	T=0.202	0.307998	4.8662e-14
rs11511253	rs11817950	0.954916	0.986815	RP11-291L22.9	ENSG00000276805.2	Cells - Cultured fibroblasts	C=0.811	T=0.189	0.45212	5.04352e-14
rs11511253	rs11146775	0.967718	0.993407	RP11-291L22.9	ENSG00000276805.2	Artery - Tibial	C=0.811	T=0.189	0.434679	5.13942e-14
rs11511253	rs11511253	1	1	RP11-291L22.9	ENSG00000276805.2	Esophagus - Mucosa	G=0.814	A=0.186	0.420786	5.22876e-14
rs11511253	rs11595308	1	1	RP11-291L22.9	ENSG00000276805.2	Esophagus - Mucosa	C=0.814	A=0.186	0.420786	5.22876e-14
rs11511253	rs11146621	0.993466	1	RP11-291L22.9	ENSG00000276805.2	Esophagus - Mucosa	G=0.813	A=0.187	0.420786	5.22876e-14
rs11511253	rs2310211	0.993466	1	RP11-291L22.9	ENSG00000276805.2	Esophagus - Mucosa	G=0.813	A=0.187	0.420786	5.22876e-14
rs11511253	rs111563184	0.891243	0.947169	RP11-291L22.9	ENSG00000276805.2	Esophagus - Mucosa	G=0.815	GC=0.185	0.418176	5.2318e-14
rs11511253	rs12570560	0.891125	0.993301	HSD17B7P2	ENSG00000099251.14	Whole Blood	C=0.798	G=0.202	0.306336	5.34186e-14
rs11511253	rs3928516	0.993466	1	RP11-291L22.9	ENSG00000276805.2	Esophagus - Mucosa	G=0.813	T=0.187	0.418013	5.41648e-14
rs11511253	rs10764162	0.616859	0.98546	RP11-291L22.9	ENSG00000276805.2	Adipose - Subcutaneous	C=0.736	T=0.264	0.390665	5.51413e-14
rs11511253	rs11146775	0.967718	0.993407	RP11-291L22.9	ENSG00000276805.2	Cells - Cultured fibroblasts	C=0.811	T=0.189	0.472881	5.66246e-14
rs11511253	rs11146655	0.961177	0.986831	RP11-291L22.9	ENSG00000276805.2	Esophagus - Mucosa	A=0.812	G=0.188	0.429449	5.71033e-14
rs11511253	rs200474745	0.974046	0.993415	RP11-291L22.9	ENSG00000276805.2	Artery - Tibial	CGAATGGAATG=0.812	C=0.188	0.425615	5.76337e-14
rs11511253	rs72639543	0.773007	0.991972	RP11-291L22.9	ENSG00000276805.2	Skin - Sun Exposed (Lower leg)	T=0.848	C=0.152	0.469495	5.83284e-14
rs11511253	rs72639544	0.773007	0.991972	RP11-291L22.9	ENSG00000276805.2	Skin - Sun Exposed (Lower leg)	A=0.848	G=0.152	0.469495	5.83284e-14
rs11511253	rs145275425	0.766973	0.991919	RP11-291L22.9	ENSG00000276805.2	Skin - Sun Exposed (Lower leg)	AT=0.849	A=0.151	0.469495	5.83284e-14
rs11511253	rs34458842	0.967718	0.993407	HSD17B7P2	ENSG00000099251.14	Whole Blood	TG=0.811	T=0.189	0.326295	5.96181e-14
rs11511253	rs9794215	0.967718	0.993407	RP11-291L22.9	ENSG00000276805.2	Artery - Tibial	C=0.811	T=0.189	0.430338	6.0285e-14
rs11511253	rs4070543	0.891125	0.993301	HSD17B7P2	ENSG00000099251.14	Whole Blood	G=0.798	A=0.202	0.304741	6.06582e-14
rs11511253	rs12772118	0.961177	0.986831	RP11-291L22.9	ENSG00000276805.2	Cells - Cultured fibroblasts	T=0.812	G=0.188	0.460209	6.1434e-14
rs11511253	rs9664979	0.961177	0.986831	RP11-291L22.9	ENSG00000276805.2	Cells - Cultured fibroblasts	G=0.812	A=0.188	0.460209	6.1434e-14
rs11511253	rs7910228	0.961177	0.986831	RP11-291L22.9	ENSG00000276805.2	Cells - Cultured fibroblasts	A=0.812	T=0.188	0.460209	6.1434e-14
rs11511253	rs71500469	0.967718	0.993407	RP11-291L22.9	ENSG00000276805.2	Cells - Cultured fibroblasts	T=0.811	G=0.189	0.469241	6.33279e-14
rs11511253	rs36072007	0.961177	0.986831	RP11-291L22.9	ENSG00000276805.2	Adipose - Subcutaneous	T=0.812	TA=0.188	0.427221	6.34858e-14
rs11511253	rs61840410	0.891125	0.993301	RP11-291L22.9	ENSG00000276805.2	Esophagus - Mucosa	C=0.798	T=0.202	0.399102	6.46782e-14
rs11511253	rs11812823	0.986895	1	RP11-291L22.9	ENSG00000276805.2	Cells - Cultured fibroblasts	T=0.816	C=0.184	0.466181	6.67595e-14
rs11511253	rs112309001	0.986895	1	RP11-291L22.9	ENSG00000276805.2	Cells - Cultured fibroblasts	AG=0.816	A=0.184	0.466181	6.67595e-14
rs11511253	rs2012084	0.973898	0.986863	RP11-291L22.9	ENSG00000276805.2	Cells - Cultured fibroblasts	T=0.814	C=0.186	0.466181	6.67595e-14
rs11511253	rs35747454	0.986895	1	RP11-291L22.9	ENSG00000276805.2	Cells - Cultured fibroblasts	G=0.816	T=0.184	0.466181	6.67595e-14
rs11511253	rs12354584	0.986895	1	RP11-291L22.9	ENSG00000276805.2	Cells - Cultured fibroblasts	G=0.816	T=0.184	0.466181	6.67595e-14
rs11511253	rs11511148	0.986895	1	RP11-291L22.9	ENSG00000276805.2	Cells - Cultured fibroblasts	C=0.816	T=0.184	0.466181	6.67595e-14
rs11511253	rs11011567	0.986895	1	RP11-291L22.9	ENSG00000276805.2	Cells - Cultured fibroblasts	A=0.816	G=0.184	0.466181	6.67595e-14
rs11511253	rs28413086	0.986895	1	RP11-291L22.9	ENSG00000276805.2	Cells - Cultured fibroblasts	T=0.816	G=0.184	0.466181	6.67595e-14
rs11511253	rs35451472	0.986895	1	RP11-291L22.9	ENSG00000276805.2	Cells - Cultured fibroblasts	C=0.816	T=0.184	0.466181	6.67595e-14
rs11511253	rs7070930	0.986895	1	RP11-291L22.9	ENSG00000276805.2	Cells - Cultured fibroblasts	G=0.816	C=0.184	0.466181	6.67595e-14
rs11511253	rs80081575	0.986895	1	RP11-291L22.9	ENSG00000276805.2	Cells - Cultured fibroblasts	G=0.816	A=0.184	0.466181	6.67595e-14
rs11511253	rs7076118	0.986895	1	RP11-291L22.9	ENSG00000276805.2	Cells - Cultured fibroblasts	C=0.816	A=0.184	0.466181	6.67595e-14
rs11511253	rs34873071	0.986895	1	RP11-291L22.9	ENSG00000276805.2	Cells - Cultured fibroblasts	G=0.816	T=0.184	0.466181	6.67595e-14
rs11511253	rs58673518	0.986895	1	RP11-291L22.9	ENSG00000276805.2	Cells - Cultured fibroblasts	G=0.816	T=0.184	0.466181	6.67595e-14
rs11511253	rs2085430	0.993439	1	RP11-291L22.9	ENSG00000276805.2	Cells - Cultured fibroblasts	C=0.815	G=0.185	0.466181	6.67595e-14
rs11511253	rs10870459	0.986895	1	RP11-291L22.9	ENSG00000276805.2	Cells - Cultured fibroblasts	A=0.816	G=0.184	0.466181	6.67595e-14
rs11511253	rs11146613	0.993439	1	RP11-291L22.9	ENSG00000276805.2	Cells - Cultured fibroblasts	C=0.815	T=0.185	0.466181	6.67595e-14
rs11511253	rs182246855	0.973833	0.99336	RP11-291L22.9	ENSG00000276805.2	Cells - Cultured fibroblasts	G=0.816	A=0.184	0.466181	6.67595e-14
rs11511253	rs12359136	0.986906	0.993431	RP11-291L22.9	ENSG00000276805.2	Cells - Cultured fibroblasts	A=0.814	T=0.186	0.466181	6.67595e-14
rs11511253	rs11146640	0.993439	1	RP11-291L22.9	ENSG00000276805.2	Cells - Cultured fibroblasts	G=0.815	A=0.185	0.466181	6.67595e-14
rs11511253	rs61837257	0.993439	1	RP11-291L22.9	ENSG00000276805.2	Esophagus - Mucosa	C=0.815	G=0.185	0.420915	6.70572e-14
rs11511253	rs11146613	0.993439	1	RP11-291L22.9	ENSG00000276805.2	Artery - Tibial	C=0.815	T=0.185	0.432122	6.87128e-14
rs11511253	rs11812823	0.986895	1	RP11-291L22.9	ENSG00000276805.2	Artery - Tibial	T=0.816	C=0.184	0.428941	7.44967e-14
rs11511253	rs112309001	0.986895	1	RP11-291L22.9	ENSG00000276805.2	Artery - Tibial	AG=0.816	A=0.184	0.428941	7.44967e-14
rs11511253	rs2012084	0.973898	0.986863	RP11-291L22.9	ENSG00000276805.2	Artery - Tibial	T=0.814	C=0.186	0.428941	7.44967e-14
rs11511253	rs35747454	0.986895	1	RP11-291L22.9	ENSG00000276805.2	Artery - Tibial	G=0.816	T=0.184	0.428941	7.44967e-14
rs11511253	rs12354584	0.986895	1	RP11-291L22.9	ENSG00000276805.2	Artery - Tibial	G=0.816	T=0.184	0.428941	7.44967e-14
rs11511253	rs11511148	0.986895	1	RP11-291L22.9	ENSG00000276805.2	Artery - Tibial	C=0.816	T=0.184	0.428941	7.44967e-14
rs11511253	rs11011567	0.986895	1	RP11-291L22.9	ENSG00000276805.2	Artery - Tibial	A=0.816	G=0.184	0.428941	7.44967e-14
rs11511253	rs28413086	0.986895	1	RP11-291L22.9	ENSG00000276805.2	Artery - Tibial	T=0.816	G=0.184	0.428941	7.44967e-14
rs11511253	rs35451472	0.986895	1	RP11-291L22.9	ENSG00000276805.2	Artery - Tibial	C=0.816	T=0.184	0.428941	7.44967e-14
rs11511253	rs7070930	0.986895	1	RP11-291L22.9	ENSG00000276805.2	Artery - Tibial	G=0.816	C=0.184	0.428941	7.44967e-14
rs11511253	rs80081575	0.986895	1	RP11-291L22.9	ENSG00000276805.2	Artery - Tibial	G=0.816	A=0.184	0.428941	7.44967e-14
rs11511253	rs34873071	0.986895	1	RP11-291L22.9	ENSG00000276805.2	Artery - Tibial	G=0.816	T=0.184	0.428941	7.44967e-14
rs11511253	rs58673518	0.986895	1	RP11-291L22.9	ENSG00000276805.2	Artery - Tibial	G=0.816	T=0.184	0.428941	7.44967e-14
rs11511253	rs2085430	0.993439	1	RP11-291L22.9	ENSG00000276805.2	Artery - Tibial	C=0.815	G=0.185	0.428941	7.44967e-14
rs11511253	rs10870459	0.986895	1	RP11-291L22.9	ENSG00000276805.2	Artery - Tibial	A=0.816	G=0.184	0.428941	7.44967e-14
rs11511253	rs182246855	0.973833	0.99336	RP11-291L22.9	ENSG00000276805.2	Artery - Tibial	G=0.816	A=0.184	0.428941	7.44967e-14
rs11511253	rs12359136	0.986906	0.993431	RP11-291L22.9	ENSG00000276805.2	Artery - Tibial	A=0.814	T=0.186	0.428941	7.44967e-14
rs11511253	rs11146640	0.993439	1	RP11-291L22.9	ENSG00000276805.2	Artery - Tibial	G=0.815	A=0.185	0.428941	7.44967e-14
rs11511253	rs11011542	0.980366	1	RP11-291L22.9	ENSG00000276805.2	Cells - Cultured fibroblasts	C=0.817	T=0.183	0.465155	7.72327e-14
rs11511253	rs2310280	0.986895	1	RP11-291L22.9	ENSG00000276805.2	Artery - Tibial	A=0.816	G=0.184	0.429118	7.99012e-14
rs11511253	rs11146877	0.986895	1	RP11-291L22.9	ENSG00000276805.2	Artery - Tibial	C=0.816	T=0.184	0.429118	7.99012e-14
rs11511253	rs7099107	0.967718	0.993407	RP11-291L22.9	ENSG00000276805.2	Esophagus - Mucosa	G=0.811	A=0.189	0.418281	8.02422e-14
rs11511253	rs367919155	0.993439	1	RP11-291L22.9	ENSG00000276805.2	Esophagus - Mucosa	G=0.815	C=0.185	0.417968	8.39337e-14
rs11511253	rs12358135	0.879145	0.986601	RP11-291L22.9	ENSG00000276805.2	Cells - Cultured fibroblasts	C=0.798	T=0.202	0.435257	8.75442e-14
rs11511253	rs11146654	0.967718	0.993407	RP11-291L22.9	ENSG00000276805.2	Esophagus - Mucosa	C=0.811	T=0.189	0.418303	9.10316e-14
rs11511253	rs9731107	0.967718	0.993407	RP11-291L22.9	ENSG00000276805.2	Esophagus - Mucosa	G=0.811	A=0.189	0.418303	9.10316e-14
rs11511253	rs7071794	0.967718	0.993407	RP11-291L22.9	ENSG00000276805.2	Esophagus - Mucosa	T=0.811	A=0.189	0.418303	9.10316e-14
rs11511253	rs11146702	0.967718	0.993407	RP11-291L22.9	ENSG00000276805.2	Esophagus - Mucosa	G=0.811	A=0.189	0.418303	9.10316e-14
rs11511253	rs11146709	0.967718	0.993407	RP11-291L22.9	ENSG00000276805.2	Esophagus - Mucosa	C=0.811	T=0.189	0.418303	9.10316e-14
rs11511253	rs11146713	0.967718	0.993407	RP11-291L22.9	ENSG00000276805.2	Esophagus - Mucosa	G=0.811	T=0.189	0.418303	9.10316e-14
rs11511253	rs11597575	0.967718	0.993407	RP11-291L22.9	ENSG00000276805.2	Esophagus - Mucosa	G=0.811	C=0.189	0.418303	9.10316e-14
rs11511253	rs10870406	0.967718	0.993407	RP11-291L22.9	ENSG00000276805.2	Esophagus - Mucosa	G=0.811	A=0.189	0.418303	9.10316e-14
rs11511253	rs4881578	0.967718	0.993407	RP11-291L22.9	ENSG00000276805.2	Esophagus - Mucosa	G=0.811	A=0.189	0.418303	9.10316e-14
rs11511253	rs4881584	0.967718	0.993407	RP11-291L22.9	ENSG00000276805.2	Esophagus - Mucosa	C=0.811	T=0.189	0.418303	9.10316e-14
rs11511253	rs11146753	0.967718	0.993407	RP11-291L22.9	ENSG00000276805.2	Esophagus - Mucosa	A=0.811	G=0.189	0.418303	9.10316e-14
rs11511253	rs10870421	0.967718	0.993407	RP11-291L22.9	ENSG00000276805.2	Esophagus - Mucosa	C=0.811	A=0.189	0.418303	9.10316e-14
rs11511253	rs11146784	0.961456	0.993399	RP11-291L22.9	ENSG00000276805.2	Esophagus - Mucosa	C=0.81	T=0.19	0.418303	9.10316e-14
rs11511253	rs12357698	0.967718	0.993407	RP11-291L22.9	ENSG00000276805.2	Esophagus - Mucosa	T=0.811	A=0.189	0.418303	9.10316e-14
rs11511253	rs4556804	0.967718	0.993407	RP11-291L22.9	ENSG00000276805.2	Esophagus - Mucosa	G=0.811	A=0.189	0.418303	9.10316e-14
rs11511253	rs77578626	0.967718	0.993407	HSD17B7P2	ENSG00000099251.14	Whole Blood	A=0.811	G=0.189	0.316086	9.1378e-14
rs11511253	rs11011542	0.980366	1	RP11-291L22.9	ENSG00000276805.2	Artery - Tibial	C=0.817	T=0.183	0.428711	1.0082e-13
rs11511253	rs36072007	0.961177	0.986831	HSD17B7P2	ENSG00000099251.14	Whole Blood	T=0.812	TA=0.188	0.326442	1.01017e-13
rs11511253	rs11146699	0.967718	0.993407	HSD17B7P2	ENSG00000099251.14	Whole Blood	G=0.811	A=0.189	0.324201	1.03414e-13
rs11511253	rs7074243	0.961456	0.993399	RP11-291L22.9	ENSG00000276805.2	Esophagus - Mucosa	A=0.81	T=0.19	0.415198	1.05513e-13
rs11511253	rs11817950	0.954916	0.986815	RP11-291L22.9	ENSG00000276805.2	Esophagus - Mucosa	C=0.811	T=0.189	0.415198	1.05513e-13
rs11511253	rs11146768	0.967718	0.993407	RP11-291L22.9	ENSG00000276805.2	Esophagus - Mucosa	C=0.811	T=0.189	0.415198	1.05513e-13
rs11511253	rs7068733	0.948142	0.973726	RP11-291L22.9	ENSG00000276805.2	Esophagus - Mucosa	C=0.814	G=0.186	0.416074	1.07071e-13
rs11511253	rs149200693	0.961177	0.986831	HSD17B7P2	ENSG00000099251.14	Whole Blood	G=0.812	C=0.188	0.326774	1.10228e-13
rs11511253	rs372035840	0.961177	0.986831	HSD17B7P2	ENSG00000099251.14	Whole Blood	AC=0.812	A=0.188	0.326774	1.10228e-13
rs11511253	rs10870371	0.961177	0.986831	HSD17B7P2	ENSG00000099251.14	Whole Blood	G=0.812	A=0.188	0.326774	1.10228e-13
rs11511253	rs11011558	0.993439	1	RP11-291L22.9	ENSG00000276805.2	Adipose - Visceral (Omentum)	G=0.815	A=0.185	0.427075	1.1734e-13
rs11511253	rs12773561	0.967718	0.993407	RP11-291L22.9	ENSG00000276805.2	Esophagus - Mucosa	G=0.811	C=0.189	0.414184	1.2146e-13
rs11511253	rs10870432	0.954916	0.986815	RP11-291L22.9	ENSG00000276805.2	Adipose - Subcutaneous	G=0.811	A=0.189	0.422577	1.21901e-13
rs11511253	rs7076118	0.986895	1	RP11-291L22.9	ENSG00000276805.2	Artery - Tibial	C=0.816	A=0.184	0.422746	1.23554e-13
rs11511253	rs7089593	0.980362	0.993396	RP11-291L22.9	ENSG00000276805.2	Cells - Cultured fibroblasts	A=0.815	G=0.185	0.455848	1.27312e-13
rs11511253	rs7089975	0.980362	0.993396	RP11-291L22.9	ENSG00000276805.2	Cells - Cultured fibroblasts	A=0.815	G=0.185	0.455848	1.27312e-13
rs11511253	rs2180800	0.980362	0.993396	RP11-291L22.9	ENSG00000276805.2	Cells - Cultured fibroblasts	C=0.815	T=0.185	0.455848	1.27312e-13
rs11511253	rs11596501	0.986895	1	RP11-291L22.9	ENSG00000276805.2	Cells - Cultured fibroblasts	G=0.816	A=0.184	0.455848	1.27312e-13
rs11511253	rs12775411	0.95526	0.993391	RP11-291L22.9	ENSG00000276805.2	Cells - Cultured fibroblasts	G=0.809	A=0.191	0.448402	1.28151e-13
rs11511253	rs61839915	0.980362	0.993396	RP11-291L22.9	ENSG00000276805.2	Cells - Cultured fibroblasts	C=0.815	T=0.185	0.455202	1.33175e-13
rs11511253	rs4088497	0.993466	1	RP11-291L22.9	ENSG00000276805.2	Esophagus - Mucosa	T=0.813	C=0.187	0.419908	1.36333e-13
rs11511253	rs7089032	0.967718	0.993407	HSD17B7P2	ENSG00000099251.14	Whole Blood	G=0.811	T=0.189	0.336104	1.39502e-13
rs11511253	rs1902549	0.967718	0.993407	RP11-291L22.9	ENSG00000276805.2	Esophagus - Mucosa	C=0.811	T=0.189	0.418826	1.40387e-13
rs11511253	rs2078283	0.773007	0.991972	RP11-291L22.9	ENSG00000276805.2	Skin - Sun Exposed (Lower leg)	T=0.848	C=0.152	0.461099	1.42485e-13
rs11511253	rs11594254	0.773007	0.991972	RP11-291L22.9	ENSG00000276805.2	Skin - Sun Exposed (Lower leg)	C=0.848	T=0.152	0.461099	1.42485e-13
rs11511253	rs10764151	0.773007	0.991972	RP11-291L22.9	ENSG00000276805.2	Skin - Sun Exposed (Lower leg)	T=0.848	G=0.152	0.461099	1.42485e-13
rs11511253	rs144575187	0.773007	0.991972	RP11-291L22.9	ENSG00000276805.2	Skin - Sun Exposed (Lower leg)	G=0.848	A=0.152	0.461099	1.42485e-13
rs11511253	rs9794215	0.967718	0.993407	RP11-291L22.9	ENSG00000276805.2	Cells - Cultured fibroblasts	C=0.811	T=0.189	0.454632	1.42603e-13
rs11511253	rs74798172	0.879145	0.986601	HSD17B7P2	ENSG00000099251.14	Whole Blood	C=0.798	G=0.202	0.309428	1.4301e-13
rs11511253	rs34458842	0.967718	0.993407	RP11-291L22.9	ENSG00000276805.2	Esophagus - Mucosa	TG=0.811	T=0.189	0.417697	1.4479e-13
rs11511253	rs10870432	0.954916	0.986815	HSD17B7P2	ENSG00000099251.14	Whole Blood	G=0.811	A=0.189	0.324407	1.46585e-13
rs11511253	rs10870418	0.961177	0.986831	RP11-291L22.9	ENSG00000276805.2	Cells - Cultured fibroblasts	C=0.812	T=0.188	0.454239	1.50182e-13
rs11511253	rs4881585	0.961177	0.986831	RP11-291L22.9	ENSG00000276805.2	Cells - Cultured fibroblasts	A=0.812	G=0.188	0.454239	1.50182e-13
rs11511253	rs12358135	0.879145	0.986601	HSD17B7P2	ENSG00000099251.14	Whole Blood	C=0.798	T=0.202	0.306109	1.54207e-13
rs11511253	rs71500469	0.967718	0.993407	RP11-291L22.9	ENSG00000276805.2	Esophagus - Mucosa	T=0.811	G=0.189	0.434046	1.5556e-13
rs11511253	rs2310280	0.986895	1	RP11-291L22.9	ENSG00000276805.2	Cells - Cultured fibroblasts	A=0.816	G=0.184	0.461865	1.63932e-13
rs11511253	rs11146877	0.986895	1	RP11-291L22.9	ENSG00000276805.2	Cells - Cultured fibroblasts	C=0.816	T=0.184	0.461865	1.63932e-13
rs11511253	rs11146699	0.967718	0.993407	RP11-291L22.9	ENSG00000276805.2	Cells - Cultured fibroblasts	G=0.811	A=0.189	0.451714	1.64769e-13
rs11511253	rs71500456	0.967718	0.993407	RP11-291L22.9	ENSG00000276805.2	Adipose - Subcutaneous	C=0.811	T=0.189	0.437109	1.75054e-13
rs11511253	rs7068365	0.967718	0.993407	RP11-291L22.9	ENSG00000276805.2	Esophagus - Mucosa	C=0.811	T=0.189	0.412279	1.77288e-13
rs11511253	rs12571507	0.936072	0.980198	RP11-291L22.9	ENSG00000276805.2	Esophagus - Mucosa	C=0.81	T=0.19	0.413643	1.81222e-13
rs11511253	rs77578626	0.967718	0.993407	RP11-291L22.9	ENSG00000276805.2	Cells - Cultured fibroblasts	A=0.811	G=0.189	0.436693	1.85606e-13
rs11511253	rs3970136	0.891125	0.993301	RP11-291L22.9	ENSG00000276805.2	Cells - Cultured fibroblasts	T=0.798	C=0.202	0.428889	1.94868e-13
rs11511253	rs11146675	0.891125	0.993301	RP11-291L22.9	ENSG00000276805.2	Cells - Cultured fibroblasts	G=0.798	T=0.202	0.428889	1.94868e-13
rs11511253	rs200474745	0.974046	0.993415	RP11-291L22.9	ENSG00000276805.2	Cells - Cultured fibroblasts	CGAATGGAATG=0.812	C=0.188	0.447315	1.96425e-13
rs11511253	rs11011501	0.967321	0.993324	RP11-291L22.9	ENSG00000276805.2	Artery - Tibial	G=0.817	A=0.183	0.423902	2.03565e-13
rs11511253	rs11011509	0.973833	0.99336	RP11-291L22.9	ENSG00000276805.2	Artery - Tibial	G=0.816	A=0.184	0.423902	2.03565e-13
rs11511253	rs7100199	0.96737	0.986792	RP11-291L22.9	ENSG00000276805.2	Artery - Tibial	T=0.815	C=0.185	0.423902	2.03565e-13
rs11511253	rs10764157	0.980366	1	RP11-291L22.9	ENSG00000276805.2	Artery - Tibial	A=0.817	G=0.183	0.423902	2.03565e-13
rs11511253	rs2021018	0.980366	1	RP11-291L22.9	ENSG00000276805.2	Artery - Tibial	G=0.817	A=0.183	0.423902	2.03565e-13
rs11511253	rs7071245	0.980366	1	RP11-291L22.9	ENSG00000276805.2	Artery - Tibial	G=0.817	A=0.183	0.423902	2.03565e-13
rs11511253	rs10827863	0.980366	1	RP11-291L22.9	ENSG00000276805.2	Artery - Tibial	T=0.817	C=0.183	0.423902	2.03565e-13
rs11511253	rs11011558	0.993439	1	RP11-291L22.9	ENSG00000276805.2	Breast - Mammary Tissue	G=0.815	A=0.185	0.458149	2.04696e-13
rs11511253	rs7089032	0.967718	0.993407	RP11-291L22.9	ENSG00000276805.2	Adipose - Subcutaneous	G=0.811	T=0.189	0.428151	2.15335e-13
rs11511253	rs11011501	0.967321	0.993324	RP11-291L22.9	ENSG00000276805.2	Cells - Cultured fibroblasts	G=0.817	A=0.183	0.459131	2.16743e-13
rs11511253	rs11011509	0.973833	0.99336	RP11-291L22.9	ENSG00000276805.2	Cells - Cultured fibroblasts	G=0.816	A=0.184	0.459131	2.16743e-13
rs11511253	rs7100199	0.96737	0.986792	RP11-291L22.9	ENSG00000276805.2	Cells - Cultured fibroblasts	T=0.815	C=0.185	0.459131	2.16743e-13
rs11511253	rs10764157	0.980366	1	RP11-291L22.9	ENSG00000276805.2	Cells - Cultured fibroblasts	A=0.817	G=0.183	0.459131	2.16743e-13
rs11511253	rs2021018	0.980366	1	RP11-291L22.9	ENSG00000276805.2	Cells - Cultured fibroblasts	G=0.817	A=0.183	0.459131	2.16743e-13
rs11511253	rs7071245	0.980366	1	RP11-291L22.9	ENSG00000276805.2	Cells - Cultured fibroblasts	G=0.817	A=0.183	0.459131	2.16743e-13
rs11511253	rs10827863	0.980366	1	RP11-291L22.9	ENSG00000276805.2	Cells - Cultured fibroblasts	T=0.817	C=0.183	0.459131	2.16743e-13
rs11511253	rs12571507	0.936072	0.980198	HSD17B7P2	ENSG00000099251.14	Whole Blood	C=0.81	T=0.19	0.319136	2.1685e-13
rs11511253	rs36072007	0.961177	0.986831	RP11-291L22.9	ENSG00000276805.2	Cells - Cultured fibroblasts	T=0.812	TA=0.188	0.455783	2.18757e-13
rs11511253	rs111563184	0.891243	0.947169	RP11-291L22.9	ENSG00000276805.2	Cells - Cultured fibroblasts	G=0.815	GC=0.185	0.442314	2.36875e-13
rs11511253	rs3970136	0.891125	0.993301	HSD17B7P2	ENSG00000099251.14	Whole Blood	T=0.798	C=0.202	0.303718	2.37088e-13
rs11511253	rs11146675	0.891125	0.993301	HSD17B7P2	ENSG00000099251.14	Whole Blood	G=0.798	T=0.202	0.303718	2.37088e-13
rs11511253	rs12772118	0.961177	0.986831	RP11-291L22.9	ENSG00000276805.2	Esophagus - Mucosa	T=0.812	G=0.188	0.41553	2.43536e-13
rs11511253	rs9664979	0.961177	0.986831	RP11-291L22.9	ENSG00000276805.2	Esophagus - Mucosa	G=0.812	A=0.188	0.41553	2.43536e-13
rs11511253	rs7910228	0.961177	0.986831	RP11-291L22.9	ENSG00000276805.2	Esophagus - Mucosa	A=0.812	T=0.188	0.41553	2.43536e-13
rs11511253	rs12775411	0.95526	0.993391	RP11-291L22.9	ENSG00000276805.2	Esophagus - Mucosa	G=0.809	A=0.191	0.410209	2.65534e-13
rs11511253	rs74798172	0.879145	0.986601	RP11-291L22.9	ENSG00000276805.2	Cells - Cultured fibroblasts	C=0.798	G=0.202	0.436022	2.77429e-13
rs11511253	rs35361303	0.961177	0.986831	RP11-291L22.9	ENSG00000276805.2	Esophagus - Mucosa	C=0.812	G=0.188	0.412373	2.81655e-13
rs11511253	rs35173665	0.948722	0.986798	RP11-291L22.9	ENSG00000276805.2	Esophagus - Mucosa	T=0.81	G=0.19	0.412373	2.81655e-13
rs11511253	rs7068771	0.961177	0.986831	RP11-291L22.9	ENSG00000276805.2	Esophagus - Mucosa	T=0.812	G=0.188	0.412373	2.81655e-13
rs11511253	rs36072007	0.961177	0.986831	RP11-291L22.9	ENSG00000276805.2	Artery - Tibial	T=0.812	TA=0.188	0.417959	2.84431e-13
rs11511253	rs10870432	0.954916	0.986815	RP11-291L22.9	ENSG00000276805.2	Artery - Tibial	G=0.811	A=0.189	0.417959	2.84431e-13
rs11511253	rs149200693	0.961177	0.986831	RP11-291L22.9	ENSG00000276805.2	Cells - Cultured fibroblasts	G=0.812	C=0.188	0.454166	2.93585e-13
rs11511253	rs372035840	0.961177	0.986831	RP11-291L22.9	ENSG00000276805.2	Cells - Cultured fibroblasts	AC=0.812	A=0.188	0.454166	2.93585e-13
rs11511253	rs10870371	0.961177	0.986831	RP11-291L22.9	ENSG00000276805.2	Cells - Cultured fibroblasts	G=0.812	A=0.188	0.454166	2.93585e-13
rs11511253	rs12571507	0.936072	0.980198	RP11-291L22.9	ENSG00000276805.2	Artery - Tibial	C=0.81	T=0.19	0.409701	2.95674e-13
rs11511253	rs11597330	0.974276	1	RP11-291L22.9	ENSG00000276805.2	Esophagus - Mucosa	C=0.81	T=0.19	0.401951	2.99169e-13
rs11511253	rs149200693	0.961177	0.986831	RP11-291L22.9	ENSG00000276805.2	Artery - Tibial	G=0.812	C=0.188	0.419458	3.00034e-13
rs11511253	rs372035840	0.961177	0.986831	RP11-291L22.9	ENSG00000276805.2	Artery - Tibial	AC=0.812	A=0.188	0.419458	3.00034e-13
rs11511253	rs10870371	0.961177	0.986831	RP11-291L22.9	ENSG00000276805.2	Artery - Tibial	G=0.812	A=0.188	0.419458	3.00034e-13
rs11511253	rs72639543	0.773007	0.991972	SEPT7P9	ENSG00000120555.13	Testis	T=0.848	C=0.152	0.464654	3.00864e-13
rs11511253	rs72639544	0.773007	0.991972	SEPT7P9	ENSG00000120555.13	Testis	A=0.848	G=0.152	0.464654	3.00864e-13
rs11511253	rs145275425	0.766973	0.991919	SEPT7P9	ENSG00000120555.13	Testis	AT=0.849	A=0.151	0.464654	3.00864e-13
rs11511253	rs35949805	0.896667	0.993309	RP11-291L22.9	ENSG00000276805.2	Cells - Cultured fibroblasts	G=0.799	A=0.201	0.427477	3.04387e-13
rs11511253	rs2078283	0.773007	0.991972	SEPT7P9	ENSG00000120555.13	Artery - Tibial	T=0.848	C=0.152	0.407731	3.30972e-13
rs11511253	rs11594254	0.773007	0.991972	SEPT7P9	ENSG00000120555.13	Artery - Tibial	C=0.848	T=0.152	0.407731	3.30972e-13
rs11511253	rs10764151	0.773007	0.991972	SEPT7P9	ENSG00000120555.13	Artery - Tibial	T=0.848	G=0.152	0.407731	3.30972e-13
rs11511253	rs144575187	0.773007	0.991972	SEPT7P9	ENSG00000120555.13	Artery - Tibial	G=0.848	A=0.152	0.407731	3.30972e-13
rs11511253	rs10764162	0.616859	0.98546	RP11-291L22.9	ENSG00000276805.2	Esophagus - Mucosa	C=0.736	T=0.264	0.384649	3.35383e-13
rs11511253	rs71500456	0.967718	0.993407	RP11-291L22.9	ENSG00000276805.2	Artery - Tibial	C=0.811	T=0.189	0.427912	3.60849e-13
rs11511253	rs7070224	0.766973	0.991919	RP11-291L22.9	ENSG00000276805.2	Skin - Sun Exposed (Lower leg)	G=0.849	A=0.151	0.456809	3.63975e-13
rs11511253	rs10870362	0.993466	1	RP11-291L22.9	ENSG00000276805.2	Esophagus - Mucosa	G=0.813	A=0.187	0.413277	3.6877e-13
rs11511253	rs71500469	0.967718	0.993407	HSD17B7P2	ENSG00000099251.14	Whole Blood	T=0.811	G=0.189	0.325784	3.75865e-13
rs11511253	rs11011558	0.993439	1	RP11-291L22.9	ENSG00000276805.2	Esophagus - Muscularis	G=0.815	A=0.185	0.461381	3.78074e-13
rs11511253	rs72639543	0.773007	0.991972	SEPT7P9	ENSG00000120555.13	Artery - Tibial	T=0.848	C=0.152	0.406799	3.87005e-13
rs11511253	rs72639544	0.773007	0.991972	SEPT7P9	ENSG00000120555.13	Artery - Tibial	A=0.848	G=0.152	0.406799	3.87005e-13
rs11511253	rs145275425	0.766973	0.991919	SEPT7P9	ENSG00000120555.13	Artery - Tibial	AT=0.849	A=0.151	0.406799	3.87005e-13
rs11511253	rs11597330	0.974276	1	RP11-291L22.9	ENSG00000276805.2	Cells - Cultured fibroblasts	C=0.81	T=0.19	0.436951	3.88152e-13
rs11511253	rs11011558	0.993439	1	RP11-291L22.9	ENSG00000276805.2	Thyroid	G=0.815	A=0.185	0.351274	4.14795e-13
rs11511253	rs10870418	0.961177	0.986831	RP11-291L22.9	ENSG00000276805.2	Esophagus - Mucosa	C=0.812	T=0.188	0.41086	4.64711e-13
rs11511253	rs4881585	0.961177	0.986831	RP11-291L22.9	ENSG00000276805.2	Esophagus - Mucosa	A=0.812	G=0.188	0.41086	4.64711e-13
rs11511253	rs7081059	0.961177	0.986831	RP11-291L22.9	ENSG00000276805.2	Esophagus - Mucosa	C=0.812	A=0.188	0.409437	4.69251e-13
rs11511253	rs10764162	0.616859	0.98546	RP11-291L22.9	ENSG00000276805.2	Cells - Cultured fibroblasts	C=0.736	T=0.264	0.420279	4.81486e-13
rs11511253	rs11592779	0.872669	0.979927	RP11-291L22.9	ENSG00000276805.2	Thyroid	C=0.799	T=0.201	0.331911	4.82531e-13
rs11511253	rs7923903	0.879145	0.986601	RP11-291L22.9	ENSG00000276805.2	Thyroid	G=0.798	A=0.202	0.331911	4.82531e-13
rs11511253	rs7896006	0.879145	0.986601	RP11-291L22.9	ENSG00000276805.2	Thyroid	C=0.798	T=0.202	0.331911	4.82531e-13
rs11511253	rs7896545	0.879145	0.986601	RP11-291L22.9	ENSG00000276805.2	Thyroid	C=0.798	T=0.202	0.331911	4.82531e-13
rs11511253	rs7076099	0.879145	0.986601	RP11-291L22.9	ENSG00000276805.2	Thyroid	G=0.798	A=0.202	0.331911	4.82531e-13
rs11511253	rs11592779	0.872669	0.979927	RP11-291L22.9	ENSG00000276805.2	Adipose - Visceral (Omentum)	C=0.799	T=0.201	0.397871	4.9202e-13
rs11511253	rs4881586	0.86621	0.973269	RP11-291L22.9	ENSG00000276805.2	Adipose - Visceral (Omentum)	C=0.8	T=0.2	0.397871	4.9202e-13
rs11511253	rs7923903	0.879145	0.986601	RP11-291L22.9	ENSG00000276805.2	Adipose - Visceral (Omentum)	G=0.798	A=0.202	0.397871	4.9202e-13
rs11511253	rs7896006	0.879145	0.986601	RP11-291L22.9	ENSG00000276805.2	Adipose - Visceral (Omentum)	C=0.798	T=0.202	0.397871	4.9202e-13
rs11511253	rs7896545	0.879145	0.986601	RP11-291L22.9	ENSG00000276805.2	Adipose - Visceral (Omentum)	C=0.798	T=0.202	0.397871	4.9202e-13
rs11511253	rs7076099	0.879145	0.986601	RP11-291L22.9	ENSG00000276805.2	Adipose - Visceral (Omentum)	G=0.798	A=0.202	0.397871	4.9202e-13
rs11511253	rs4881568	0.695662	0.991226	SEPT7P9	ENSG00000120555.13	Testis	C=0.861	G=0.139	0.458409	5.05354e-13
rs11511253	rs10870432	0.954916	0.986815	RP11-291L22.9	ENSG00000276805.2	Cells - Cultured fibroblasts	G=0.811	A=0.189	0.449765	5.24592e-13
rs11511253	rs2474559	0.760545	0.983943	SEPT7P9	ENSG00000120555.13	Artery - Tibial	G=0.848	A=0.152	0.405986	5.26174e-13
rs11511253	rs34740065	0.766973	0.991919	SEPT7P9	ENSG00000120555.13	Artery - Tibial	GT=0.849	G=0.151	0.405986	5.26174e-13
rs11511253	rs12358135	0.879145	0.986601	RP11-291L22.9	ENSG00000276805.2	Esophagus - Mucosa	C=0.798	T=0.202	0.390657	5.62399e-13
rs11511253	rs71500456	0.967718	0.993407	RP11-291L22.9	ENSG00000276805.2	Cells - Cultured fibroblasts	C=0.811	T=0.189	0.452557	5.72078e-13
rs11511253	rs2078283	0.773007	0.991972	SEPT7P9	ENSG00000120555.13	Testis	T=0.848	C=0.152	0.458363	5.75567e-13
rs11511253	rs11594254	0.773007	0.991972	SEPT7P9	ENSG00000120555.13	Testis	C=0.848	T=0.152	0.458363	5.75567e-13
rs11511253	rs10764151	0.773007	0.991972	SEPT7P9	ENSG00000120555.13	Testis	T=0.848	G=0.152	0.458363	5.75567e-13
rs11511253	rs144575187	0.773007	0.991972	SEPT7P9	ENSG00000120555.13	Testis	G=0.848	A=0.152	0.458363	5.75567e-13
rs11511253	rs200474745	0.974046	0.993415	RP11-291L22.9	ENSG00000276805.2	Esophagus - Mucosa	CGAATGGAATG=0.812	C=0.188	0.404884	5.79103e-13
rs11511253	rs35949805	0.896667	0.993309	HSD17B7P2	ENSG00000099251.14	Whole Blood	G=0.799	A=0.201	0.302856	5.79467e-13
rs11511253	rs7070224	0.766973	0.991919	SEPT7P9	ENSG00000120555.13	Artery - Tibial	G=0.849	A=0.151	0.405069	6.13727e-13
rs11511253	rs4881586	0.86621	0.973269	RP11-291L22.9	ENSG00000276805.2	Thyroid	C=0.8	T=0.2	0.331899	6.14558e-13
rs11511253	rs7070224	0.766973	0.991919	SEPT7P9	ENSG00000120555.13	Testis	G=0.849	A=0.151	0.459456	6.47958e-13
rs11511253	rs200253039	0.993439	1	RP11-291L22.9	ENSG00000276805.2	Breast - Mammary Tissue	C=0.815	T=0.185	0.448237	7.04858e-13
rs11511253	rs10764162	0.616859	0.98546	RP11-291L22.9	ENSG00000276805.2	Artery - Tibial	C=0.736	T=0.264	0.37897	7.44424e-13
rs11511253	rs4881568	0.695662	0.991226	SEPT7P9	ENSG00000120555.13	Artery - Tibial	C=0.861	G=0.139	0.397615	8.39606e-13
rs11511253	rs11011533	0.986895	1	RP11-291L22.9	ENSG00000276805.2	Breast - Mammary Tissue	G=0.816	A=0.184	0.449301	8.50354e-13
rs11511253	rs10827860	0.986895	1	RP11-291L22.9	ENSG00000276805.2	Breast - Mammary Tissue	G=0.816	A=0.184	0.449301	8.50354e-13
rs11511253	rs10827862	0.986895	1	RP11-291L22.9	ENSG00000276805.2	Breast - Mammary Tissue	C=0.816	A=0.184	0.449301	8.50354e-13
rs11511253	rs7917312	0.986895	1	RP11-291L22.9	ENSG00000276805.2	Breast - Mammary Tissue	C=0.816	T=0.184	0.449301	8.50354e-13
rs11511253	rs11011543	0.986895	1	RP11-291L22.9	ENSG00000276805.2	Breast - Mammary Tissue	A=0.816	T=0.184	0.449301	8.50354e-13
rs11511253	rs10827866	0.986895	1	RP11-291L22.9	ENSG00000276805.2	Breast - Mammary Tissue	G=0.816	T=0.184	0.449301	8.50354e-13
rs11511253	rs66610970	0.986895	1	RP11-291L22.9	ENSG00000276805.2	Breast - Mammary Tissue	CT=0.816	C=0.184	0.449301	8.50354e-13
rs11511253	rs138284504	0.986895	1	RP11-291L22.9	ENSG00000276805.2	Breast - Mammary Tissue	C=0.816	T=0.184	0.449301	8.50354e-13
rs11511253	rs10827867	0.986895	1	RP11-291L22.9	ENSG00000276805.2	Breast - Mammary Tissue	T=0.816	C=0.184	0.449301	8.50354e-13
rs11511253	rs200911607	0.629621	0.909318	SEPT7P9	ENSG00000120555.13	Testis	G=0.852	A=0.148	0.439636	8.59845e-13
rs11511253	rs113817255	0.678141	0.991034	SEPT7P9	ENSG00000120555.13	Testis	G=0.864	A=0.136	0.439636	8.59845e-13
rs11511253	rs12778402	0.606721	0.899728	SEPT7P9	ENSG00000120555.13	Testis	G=0.854	T=0.146	0.439636	8.59845e-13
rs11511253	rs12772894	0.606721	0.899728	SEPT7P9	ENSG00000120555.13	Testis	C=0.854	A=0.146	0.439636	8.59845e-13
rs11511253	rs35300351	0.606721	0.899728	SEPT7P9	ENSG00000120555.13	Testis	C=0.854	G=0.146	0.439636	8.59845e-13
rs11511253	rs142118560	0.618257	0.901074	SEPT7P9	ENSG00000120555.13	Testis	TAA=0.852	T=0.148	0.439636	8.59845e-13
rs11511253	rs2474559	0.760545	0.983943	RP11-291L22.9	ENSG00000276805.2	Skin - Sun Exposed (Lower leg)	G=0.848	A=0.152	0.44825	8.68734e-13
rs11511253	rs34740065	0.766973	0.991919	RP11-291L22.9	ENSG00000276805.2	Skin - Sun Exposed (Lower leg)	GT=0.849	G=0.151	0.44825	8.68734e-13
rs11511253	rs11511253	1	1	RP11-291L22.9	ENSG00000276805.2	Adipose - Visceral (Omentum)	G=0.814	A=0.186	0.415966	9.1538e-13
rs11511253	rs111563184	0.891243	0.947169	RP11-291L22.9	ENSG00000276805.2	Breast - Mammary Tissue	G=0.815	GC=0.185	0.451099	9.42003e-13
rs11511253	rs200220357	0.993439	1	RP11-291L22.9	ENSG00000276805.2	Esophagus - Mucosa	C=0.815	T=0.185	0.404946	9.76222e-13
rs11511253	rs7095128	0.993439	1	RP11-291L22.9	ENSG00000276805.2	Esophagus - Mucosa	G=0.815	C=0.185	0.404946	9.76222e-13
rs11511253	rs71500456	0.967718	0.993407	HSD17B7P2	ENSG00000099251.14	Whole Blood	C=0.811	T=0.189	0.321562	1.00186e-12
rs11511253	rs3928516	0.993466	1	RP11-291L22.9	ENSG00000276805.2	Adipose - Visceral (Omentum)	G=0.813	T=0.187	0.410826	1.02408e-12
rs11511253	rs138735631	0.684639	1	SEPT7P9	ENSG00000120555.13	Testis	CAG=0.865	C=0.135	0.45343	1.06294e-12
rs11511253	rs61839533	0.684639	1	SEPT7P9	ENSG00000120555.13	Testis	C=0.865	A=0.135	0.45343	1.06294e-12
rs11511253	rs80054287	0.684639	1	SEPT7P9	ENSG00000120555.13	Testis	C=0.865	T=0.135	0.45343	1.06294e-12
rs11511253	rs201797049	0.684639	1	SEPT7P9	ENSG00000120555.13	Testis	G=0.865	A=0.135	0.45343	1.06294e-12
rs11511253	rs4070286	0.684639	1	SEPT7P9	ENSG00000120555.13	Testis	C=0.865	G=0.135	0.45343	1.06294e-12
rs11511253	rs11146593	0.690467	1	SEPT7P9	ENSG00000120555.13	Testis	C=0.864	A=0.136	0.45343	1.06294e-12
rs11511253	rs11146775	0.967718	0.993407	RP11-291L22.9	ENSG00000276805.2	Esophagus - Mucosa	C=0.811	T=0.189	0.412716	1.07882e-12
rs11511253	rs11814605	0.684639	1	SEPT7P9	ENSG00000120555.13	Testis	A=0.865	G=0.135	0.461144	1.10256e-12
rs11511253	rs2180899	0.728744	1	RP11-291L22.9	ENSG00000276805.2	Esophagus - Mucosa	G=0.761	A=0.239	0.366515	1.11955e-12
rs11511253	rs10764162	0.616859	0.98546	RP11-291L22.9	ENSG00000276805.2	Pancreas	C=0.736	T=0.264	0.531685	1.1414e-12
rs11511253	rs12357347	0.683968	0.991099	SEPT7P9	ENSG00000120555.13	Artery - Tibial	G=0.863	A=0.137	0.411968	1.14451e-12
rs11511253	rs10870381	0.659207	0.964905	SEPT7P9	ENSG00000120555.13	Testis	C=0.861	T=0.139	0.453548	1.16013e-12
rs11511253	rs3928516	0.993466	1	RP11-291L22.9	ENSG00000276805.2	Thyroid	G=0.813	T=0.187	0.344096	1.1701e-12
rs11511253	rs4881618	0.993466	1	RP11-291L22.9	ENSG00000276805.2	Esophagus - Mucosa	G=0.813	T=0.187	0.401769	1.17606e-12
rs11511253	rs2474559	0.760545	0.983943	SEPT7P9	ENSG00000120555.13	Testis	G=0.848	A=0.152	0.453683	1.18587e-12
rs11511253	rs34740065	0.766973	0.991919	SEPT7P9	ENSG00000120555.13	Testis	GT=0.849	G=0.151	0.453683	1.18587e-12
rs11511253	rs11595308	1	1	RP11-291L22.9	ENSG00000276805.2	Adipose - Visceral (Omentum)	C=0.814	A=0.186	0.41176	1.1958e-12
rs11511253	rs11146621	0.993466	1	RP11-291L22.9	ENSG00000276805.2	Adipose - Visceral (Omentum)	G=0.813	A=0.187	0.41176	1.1958e-12
rs11511253	rs2310211	0.993466	1	RP11-291L22.9	ENSG00000276805.2	Adipose - Visceral (Omentum)	G=0.813	A=0.187	0.41176	1.1958e-12
rs11511253	rs144280981	0.986906	0.993431	RP11-291L22.9	ENSG00000276805.2	Breast - Mammary Tissue	C=0.814	T=0.186	0.444974	1.20417e-12
rs11511253	rs7093896	0.993439	1	RP11-291L22.9	ENSG00000276805.2	Breast - Mammary Tissue	A=0.815	T=0.185	0.444974	1.20417e-12
rs11511253	rs3087759	0.993439	1	RP11-291L22.9	ENSG00000276805.2	Breast - Mammary Tissue	A=0.815	C=0.185	0.444974	1.20417e-12
rs11511253	rs4934946	0.993439	1	RP11-291L22.9	ENSG00000276805.2	Breast - Mammary Tissue	T=0.815	C=0.185	0.444974	1.20417e-12
rs11511253	rs11011555	0.993439	1	RP11-291L22.9	ENSG00000276805.2	Breast - Mammary Tissue	T=0.815	C=0.185	0.444974	1.20417e-12
rs11511253	rs61837224	0.993439	1	RP11-291L22.9	ENSG00000276805.2	Breast - Mammary Tissue	G=0.815	C=0.185	0.444974	1.20417e-12
rs11511253	rs117398853	0.993439	1	RP11-291L22.9	ENSG00000276805.2	Breast - Mammary Tissue	C=0.815	G=0.185	0.444974	1.20417e-12
rs11511253	rs61837257	0.993439	1	RP11-291L22.9	ENSG00000276805.2	Breast - Mammary Tissue	C=0.815	G=0.185	0.444974	1.20417e-12
rs11511253	rs9663128	0.993439	1	RP11-291L22.9	ENSG00000276805.2	Breast - Mammary Tissue	C=0.815	G=0.185	0.444974	1.20417e-12
rs11511253	rs7088208	0.986906	0.993431	RP11-291L22.9	ENSG00000276805.2	Breast - Mammary Tissue	T=0.814	C=0.186	0.444974	1.20417e-12
rs11511253	rs117840800	0.993439	1	RP11-291L22.9	ENSG00000276805.2	Breast - Mammary Tissue	A=0.815	G=0.185	0.444974	1.20417e-12
rs11511253	rs74890899	0.986895	1	RP11-291L22.9	ENSG00000276805.2	Breast - Mammary Tissue	C=0.816	T=0.184	0.444974	1.20417e-12
rs11511253	rs1810634	0.993439	1	RP11-291L22.9	ENSG00000276805.2	Breast - Mammary Tissue	A=0.815	G=0.185	0.444974	1.20417e-12
rs11511253	rs9664768	0.993439	1	RP11-291L22.9	ENSG00000276805.2	Breast - Mammary Tissue	G=0.815	A=0.185	0.444974	1.20417e-12
rs11511253	rs72639568	0.993439	1	RP11-291L22.9	ENSG00000276805.2	Breast - Mammary Tissue	G=0.815	A=0.185	0.444974	1.20417e-12
rs11511253	rs77114817	0.986895	1	RP11-291L22.9	ENSG00000276805.2	Breast - Mammary Tissue	T=0.816	C=0.184	0.444974	1.20417e-12
rs11511253	rs11492515	0.993439	1	RP11-291L22.9	ENSG00000276805.2	Breast - Mammary Tissue	C=0.815	T=0.185	0.444974	1.20417e-12
rs11511253	rs11492459	0.993439	1	RP11-291L22.9	ENSG00000276805.2	Breast - Mammary Tissue	T=0.815	C=0.185	0.444974	1.20417e-12
rs11511253	rs7084618	0.993439	1	RP11-291L22.9	ENSG00000276805.2	Breast - Mammary Tissue	A=0.815	T=0.185	0.444974	1.20417e-12
rs11511253	rs7095113	0.993439	1	RP11-291L22.9	ENSG00000276805.2	Breast - Mammary Tissue	G=0.815	A=0.185	0.444974	1.20417e-12
rs11511253	rs148773254	0.993439	1	RP11-291L22.9	ENSG00000276805.2	Breast - Mammary Tissue	C=0.815	T=0.185	0.444974	1.20417e-12
rs11511253	rs12775030	0.993439	1	RP11-291L22.9	ENSG00000276805.2	Breast - Mammary Tissue	C=0.815	T=0.185	0.444974	1.20417e-12
rs11511253	rs4623823	0.993439	1	RP11-291L22.9	ENSG00000276805.2	Breast - Mammary Tissue	C=0.815	T=0.185	0.444974	1.20417e-12
rs11511253	rs35712971	0.993439	1	RP11-291L22.9	ENSG00000276805.2	Breast - Mammary Tissue	A=0.815	T=0.185	0.444974	1.20417e-12
rs11511253	rs11146894	0.986895	1	RP11-291L22.9	ENSG00000276805.2	Breast - Mammary Tissue	G=0.816	A=0.184	0.444974	1.20417e-12
rs11511253	rs4572067	0.993439	1	RP11-291L22.9	ENSG00000276805.2	Breast - Mammary Tissue	G=0.815	T=0.185	0.444974	1.20417e-12
rs11511253	rs11146911	1	1	RP11-291L22.9	ENSG00000276805.2	Breast - Mammary Tissue	C=0.814	A=0.186	0.444974	1.20417e-12
rs11511253	rs7087510	0.891125	0.993301	RP11-291L22.9	ENSG00000276805.2	Adipose - Visceral (Omentum)	G=0.798	A=0.202	0.392508	1.22084e-12
rs11511253	rs138310998	0.891125	0.993301	RP11-291L22.9	ENSG00000276805.2	Adipose - Visceral (Omentum)	G=0.798	A=0.202	0.392508	1.22084e-12
rs11511253	rs4070543	0.891125	0.993301	RP11-291L22.9	ENSG00000276805.2	Adipose - Visceral (Omentum)	G=0.798	A=0.202	0.392508	1.22084e-12
rs11511253	rs12570560	0.891125	0.993301	RP11-291L22.9	ENSG00000276805.2	Adipose - Visceral (Omentum)	C=0.798	G=0.202	0.392508	1.22084e-12
rs11511253	rs12571329	0.891125	0.993301	RP11-291L22.9	ENSG00000276805.2	Adipose - Visceral (Omentum)	G=0.798	A=0.202	0.392508	1.22084e-12
rs11511253	rs7069025	0.891125	0.993301	RP11-291L22.9	ENSG00000276805.2	Adipose - Visceral (Omentum)	G=0.798	A=0.202	0.392508	1.22084e-12
rs11511253	rs12770432	0.891125	0.993301	RP11-291L22.9	ENSG00000276805.2	Adipose - Visceral (Omentum)	G=0.798	A=0.202	0.392508	1.22084e-12
rs11511253	rs7089593	0.980362	0.993396	RP11-291L22.9	ENSG00000276805.2	Esophagus - Mucosa	A=0.815	G=0.185	0.402594	1.22349e-12
rs11511253	rs7089975	0.980362	0.993396	RP11-291L22.9	ENSG00000276805.2	Esophagus - Mucosa	A=0.815	G=0.185	0.402594	1.22349e-12
rs11511253	rs2180800	0.980362	0.993396	RP11-291L22.9	ENSG00000276805.2	Esophagus - Mucosa	C=0.815	T=0.185	0.402594	1.22349e-12
rs11511253	rs11596501	0.986895	1	RP11-291L22.9	ENSG00000276805.2	Esophagus - Mucosa	G=0.816	A=0.184	0.402594	1.22349e-12
rs11511253	rs11011546	0.986895	1	RP11-291L22.9	ENSG00000276805.2	Esophagus - Mucosa	G=0.816	A=0.184	0.402594	1.22349e-12
rs11511253	rs144280981	0.986906	0.993431	RP11-291L22.9	ENSG00000276805.2	Adipose - Visceral (Omentum)	C=0.814	T=0.186	0.410435	1.22893e-12
rs11511253	rs7093896	0.993439	1	RP11-291L22.9	ENSG00000276805.2	Adipose - Visceral (Omentum)	A=0.815	T=0.185	0.410435	1.22893e-12
rs11511253	rs3087759	0.993439	1	RP11-291L22.9	ENSG00000276805.2	Adipose - Visceral (Omentum)	A=0.815	C=0.185	0.410435	1.22893e-12
rs11511253	rs4934946	0.993439	1	RP11-291L22.9	ENSG00000276805.2	Adipose - Visceral (Omentum)	T=0.815	C=0.185	0.410435	1.22893e-12
rs11511253	rs11011555	0.993439	1	RP11-291L22.9	ENSG00000276805.2	Adipose - Visceral (Omentum)	T=0.815	C=0.185	0.410435	1.22893e-12
rs11511253	rs61837224	0.993439	1	RP11-291L22.9	ENSG00000276805.2	Adipose - Visceral (Omentum)	G=0.815	C=0.185	0.410435	1.22893e-12
rs11511253	rs117398853	0.993439	1	RP11-291L22.9	ENSG00000276805.2	Adipose - Visceral (Omentum)	C=0.815	G=0.185	0.410435	1.22893e-12
rs11511253	rs9663128	0.993439	1	RP11-291L22.9	ENSG00000276805.2	Adipose - Visceral (Omentum)	C=0.815	G=0.185	0.410435	1.22893e-12
rs11511253	rs7088208	0.986906	0.993431	RP11-291L22.9	ENSG00000276805.2	Adipose - Visceral (Omentum)	T=0.814	C=0.186	0.410435	1.22893e-12
rs11511253	rs117840800	0.993439	1	RP11-291L22.9	ENSG00000276805.2	Adipose - Visceral (Omentum)	A=0.815	G=0.185	0.410435	1.22893e-12
rs11511253	rs74890899	0.986895	1	RP11-291L22.9	ENSG00000276805.2	Adipose - Visceral (Omentum)	C=0.816	T=0.184	0.410435	1.22893e-12
rs11511253	rs1810634	0.993439	1	RP11-291L22.9	ENSG00000276805.2	Adipose - Visceral (Omentum)	A=0.815	G=0.185	0.410435	1.22893e-12
rs11511253	rs9664768	0.993439	1	RP11-291L22.9	ENSG00000276805.2	Adipose - Visceral (Omentum)	G=0.815	A=0.185	0.410435	1.22893e-12
rs11511253	rs72639568	0.993439	1	RP11-291L22.9	ENSG00000276805.2	Adipose - Visceral (Omentum)	G=0.815	A=0.185	0.410435	1.22893e-12
rs11511253	rs77114817	0.986895	1	RP11-291L22.9	ENSG00000276805.2	Adipose - Visceral (Omentum)	T=0.816	C=0.184	0.410435	1.22893e-12
rs11511253	rs11492515	0.993439	1	RP11-291L22.9	ENSG00000276805.2	Adipose - Visceral (Omentum)	C=0.815	T=0.185	0.410435	1.22893e-12
rs11511253	rs11492459	0.993439	1	RP11-291L22.9	ENSG00000276805.2	Adipose - Visceral (Omentum)	T=0.815	C=0.185	0.410435	1.22893e-12
rs11511253	rs200253039	0.993439	1	RP11-291L22.9	ENSG00000276805.2	Adipose - Visceral (Omentum)	C=0.815	T=0.185	0.410435	1.22893e-12
rs11511253	rs7084618	0.993439	1	RP11-291L22.9	ENSG00000276805.2	Adipose - Visceral (Omentum)	A=0.815	T=0.185	0.410435	1.22893e-12
rs11511253	rs7095113	0.993439	1	RP11-291L22.9	ENSG00000276805.2	Adipose - Visceral (Omentum)	G=0.815	A=0.185	0.410435	1.22893e-12
rs11511253	rs148773254	0.993439	1	RP11-291L22.9	ENSG00000276805.2	Adipose - Visceral (Omentum)	C=0.815	T=0.185	0.410435	1.22893e-12
rs11511253	rs12775030	0.993439	1	RP11-291L22.9	ENSG00000276805.2	Adipose - Visceral (Omentum)	C=0.815	T=0.185	0.410435	1.22893e-12
rs11511253	rs4623823	0.993439	1	RP11-291L22.9	ENSG00000276805.2	Adipose - Visceral (Omentum)	C=0.815	T=0.185	0.410435	1.22893e-12
rs11511253	rs35712971	0.993439	1	RP11-291L22.9	ENSG00000276805.2	Adipose - Visceral (Omentum)	A=0.815	T=0.185	0.410435	1.22893e-12
rs11511253	rs11146894	0.986895	1	RP11-291L22.9	ENSG00000276805.2	Adipose - Visceral (Omentum)	G=0.816	A=0.184	0.410435	1.22893e-12
rs11511253	rs4572067	0.993439	1	RP11-291L22.9	ENSG00000276805.2	Adipose - Visceral (Omentum)	G=0.815	T=0.185	0.410435	1.22893e-12
rs11511253	rs11146911	1	1	RP11-291L22.9	ENSG00000276805.2	Adipose - Visceral (Omentum)	C=0.814	A=0.186	0.410435	1.22893e-12
rs11511253	rs7087510	0.891125	0.993301	RP11-291L22.9	ENSG00000276805.2	Thyroid	G=0.798	A=0.202	0.326217	1.23501e-12
rs11511253	rs138310998	0.891125	0.993301	RP11-291L22.9	ENSG00000276805.2	Thyroid	G=0.798	A=0.202	0.326217	1.23501e-12
rs11511253	rs4070543	0.891125	0.993301	RP11-291L22.9	ENSG00000276805.2	Thyroid	G=0.798	A=0.202	0.326217	1.23501e-12
rs11511253	rs12570560	0.891125	0.993301	RP11-291L22.9	ENSG00000276805.2	Thyroid	C=0.798	G=0.202	0.326217	1.23501e-12
rs11511253	rs12571329	0.891125	0.993301	RP11-291L22.9	ENSG00000276805.2	Thyroid	G=0.798	A=0.202	0.326217	1.23501e-12
rs11511253	rs7069025	0.891125	0.993301	RP11-291L22.9	ENSG00000276805.2	Thyroid	G=0.798	A=0.202	0.326217	1.23501e-12
rs11511253	rs12770432	0.891125	0.993301	RP11-291L22.9	ENSG00000276805.2	Thyroid	G=0.798	A=0.202	0.326217	1.23501e-12
rs11511253	rs77578626	0.967718	0.993407	RP11-291L22.9	ENSG00000276805.2	Pancreas	A=0.811	G=0.189	0.56495	1.29489e-12
rs11511253	rs11011543	0.986895	1	RP11-291L22.9	ENSG00000276805.2	Thyroid	A=0.816	T=0.184	0.34539	1.35519e-12
rs11511253	rs10827866	0.986895	1	RP11-291L22.9	ENSG00000276805.2	Thyroid	G=0.816	T=0.184	0.34539	1.35519e-12
rs11511253	rs66610970	0.986895	1	RP11-291L22.9	ENSG00000276805.2	Thyroid	CT=0.816	C=0.184	0.34539	1.35519e-12
rs11511253	rs138284504	0.986895	1	RP11-291L22.9	ENSG00000276805.2	Thyroid	C=0.816	T=0.184	0.34539	1.35519e-12
rs11511253	rs10827867	0.986895	1	RP11-291L22.9	ENSG00000276805.2	Thyroid	T=0.816	C=0.184	0.34539	1.35519e-12
rs11511253	rs367919155	0.993439	1	RP11-291L22.9	ENSG00000276805.2	Adipose - Visceral (Omentum)	G=0.815	C=0.185	0.411202	1.36282e-12
rs11511253	rs77578626	0.967718	0.993407	RP11-291L22.9	ENSG00000276805.2	Esophagus - Mucosa	A=0.811	G=0.189	0.394075	1.3796e-12
rs11511253	rs111563184	0.891243	0.947169	RP11-291L22.9	ENSG00000276805.2	Pancreas	G=0.815	GC=0.185	0.55895	1.38993e-12
rs11511253	rs61837257	0.993439	1	RP11-291L22.9	ENSG00000276805.2	Adipose - Visceral (Omentum)	C=0.815	G=0.185	0.409954	1.39307e-12
rs11511253	rs367919155	0.993439	1	RP11-291L22.9	ENSG00000276805.2	Breast - Mammary Tissue	G=0.815	C=0.185	0.443015	1.48578e-12
rs11511253	rs11595308	1	1	RP11-291L22.9	ENSG00000276805.2	Breast - Mammary Tissue	C=0.814	A=0.186	0.443015	1.48578e-12
rs11511253	rs11146621	0.993466	1	RP11-291L22.9	ENSG00000276805.2	Breast - Mammary Tissue	G=0.813	A=0.187	0.443015	1.48578e-12
rs11511253	rs2310211	0.993466	1	RP11-291L22.9	ENSG00000276805.2	Breast - Mammary Tissue	G=0.813	A=0.187	0.443015	1.48578e-12
rs11511253	rs61839915	0.980362	0.993396	RP11-291L22.9	ENSG00000276805.2	Esophagus - Mucosa	C=0.815	T=0.185	0.400717	1.57247e-12
rs11511253	rs12775030	0.993439	1	RP11-291L22.9	ENSG00000276805.2	Thyroid	C=0.815	T=0.185	0.344221	1.58685e-12
rs11511253	rs7089032	0.967718	0.993407	RP11-291L22.9	ENSG00000276805.2	Esophagus - Mucosa	G=0.811	T=0.189	0.416042	1.68059e-12
rs11511253	rs367919155	0.993439	1	RP11-291L22.9	ENSG00000276805.2	Thyroid	G=0.815	C=0.185	0.343628	1.69386e-12
rs11511253	rs11595308	1	1	RP11-291L22.9	ENSG00000276805.2	Thyroid	C=0.814	A=0.186	0.343628	1.69386e-12
rs11511253	rs11146621	0.993466	1	RP11-291L22.9	ENSG00000276805.2	Thyroid	G=0.813	A=0.187	0.343628	1.69386e-12
rs11511253	rs2310211	0.993466	1	RP11-291L22.9	ENSG00000276805.2	Thyroid	G=0.813	A=0.187	0.343628	1.69386e-12
rs11511253	rs11011543	0.986895	1	RP11-291L22.9	ENSG00000276805.2	Adipose - Visceral (Omentum)	A=0.816	T=0.184	0.408816	1.76425e-12
rs11511253	rs10827866	0.986895	1	RP11-291L22.9	ENSG00000276805.2	Adipose - Visceral (Omentum)	G=0.816	T=0.184	0.408816	1.76425e-12
rs11511253	rs66610970	0.986895	1	RP11-291L22.9	ENSG00000276805.2	Adipose - Visceral (Omentum)	CT=0.816	C=0.184	0.408816	1.76425e-12
rs11511253	rs138284504	0.986895	1	RP11-291L22.9	ENSG00000276805.2	Adipose - Visceral (Omentum)	C=0.816	T=0.184	0.408816	1.76425e-12
rs11511253	rs10827867	0.986895	1	RP11-291L22.9	ENSG00000276805.2	Adipose - Visceral (Omentum)	T=0.816	C=0.184	0.408816	1.76425e-12
rs11511253	rs144280981	0.986906	0.993431	RP11-291L22.9	ENSG00000276805.2	Thyroid	C=0.814	T=0.186	0.343583	1.77055e-12
rs11511253	rs7093896	0.993439	1	RP11-291L22.9	ENSG00000276805.2	Thyroid	A=0.815	T=0.185	0.343583	1.77055e-12
rs11511253	rs3087759	0.993439	1	RP11-291L22.9	ENSG00000276805.2	Thyroid	A=0.815	C=0.185	0.343583	1.77055e-12
rs11511253	rs4934946	0.993439	1	RP11-291L22.9	ENSG00000276805.2	Thyroid	T=0.815	C=0.185	0.343583	1.77055e-12
rs11511253	rs11011555	0.993439	1	RP11-291L22.9	ENSG00000276805.2	Thyroid	T=0.815	C=0.185	0.343583	1.77055e-12
rs11511253	rs61837224	0.993439	1	RP11-291L22.9	ENSG00000276805.2	Thyroid	G=0.815	C=0.185	0.343583	1.77055e-12
rs11511253	rs117398853	0.993439	1	RP11-291L22.9	ENSG00000276805.2	Thyroid	C=0.815	G=0.185	0.343583	1.77055e-12
rs11511253	rs9663128	0.993439	1	RP11-291L22.9	ENSG00000276805.2	Thyroid	C=0.815	G=0.185	0.343583	1.77055e-12
rs11511253	rs7088208	0.986906	0.993431	RP11-291L22.9	ENSG00000276805.2	Thyroid	T=0.814	C=0.186	0.343583	1.77055e-12
rs11511253	rs117840800	0.993439	1	RP11-291L22.9	ENSG00000276805.2	Thyroid	A=0.815	G=0.185	0.343583	1.77055e-12
rs11511253	rs74890899	0.986895	1	RP11-291L22.9	ENSG00000276805.2	Thyroid	C=0.816	T=0.184	0.343583	1.77055e-12
rs11511253	rs1810634	0.993439	1	RP11-291L22.9	ENSG00000276805.2	Thyroid	A=0.815	G=0.185	0.343583	1.77055e-12
rs11511253	rs9664768	0.993439	1	RP11-291L22.9	ENSG00000276805.2	Thyroid	G=0.815	A=0.185	0.343583	1.77055e-12
rs11511253	rs72639568	0.993439	1	RP11-291L22.9	ENSG00000276805.2	Thyroid	G=0.815	A=0.185	0.343583	1.77055e-12
rs11511253	rs77114817	0.986895	1	RP11-291L22.9	ENSG00000276805.2	Thyroid	T=0.816	C=0.184	0.343583	1.77055e-12
rs11511253	rs11492515	0.993439	1	RP11-291L22.9	ENSG00000276805.2	Thyroid	C=0.815	T=0.185	0.343583	1.77055e-12
rs11511253	rs11492459	0.993439	1	RP11-291L22.9	ENSG00000276805.2	Thyroid	T=0.815	C=0.185	0.343583	1.77055e-12
rs11511253	rs200253039	0.993439	1	RP11-291L22.9	ENSG00000276805.2	Thyroid	C=0.815	T=0.185	0.343583	1.77055e-12
rs11511253	rs7084618	0.993439	1	RP11-291L22.9	ENSG00000276805.2	Thyroid	A=0.815	T=0.185	0.343583	1.77055e-12
rs11511253	rs7095113	0.993439	1	RP11-291L22.9	ENSG00000276805.2	Thyroid	G=0.815	A=0.185	0.343583	1.77055e-12
rs11511253	rs148773254	0.993439	1	RP11-291L22.9	ENSG00000276805.2	Thyroid	C=0.815	T=0.185	0.343583	1.77055e-12
rs11511253	rs4623823	0.993439	1	RP11-291L22.9	ENSG00000276805.2	Thyroid	C=0.815	T=0.185	0.343583	1.77055e-12
rs11511253	rs35712971	0.993439	1	RP11-291L22.9	ENSG00000276805.2	Thyroid	A=0.815	T=0.185	0.343583	1.77055e-12
rs11511253	rs11146894	0.986895	1	RP11-291L22.9	ENSG00000276805.2	Thyroid	G=0.816	A=0.184	0.343583	1.77055e-12
rs11511253	rs4572067	0.993439	1	RP11-291L22.9	ENSG00000276805.2	Thyroid	G=0.815	T=0.185	0.343583	1.77055e-12
rs11511253	rs11146911	1	1	RP11-291L22.9	ENSG00000276805.2	Thyroid	C=0.814	A=0.186	0.343583	1.77055e-12
rs11511253	rs2180899	0.728744	1	RP11-291L22.9	ENSG00000276805.2	Breast - Mammary Tissue	G=0.761	A=0.239	0.414343	1.80609e-12
rs11511253	rs61837257	0.993439	1	RP11-291L22.9	ENSG00000276805.2	Thyroid	C=0.815	G=0.185	0.345153	1.82906e-12
rs11511253	rs11597330	0.974276	1	RP11-291L22.9	ENSG00000276805.2	Thyroid	C=0.81	T=0.19	0.343009	1.88455e-12
rs11511253	rs61840410	0.891125	0.993301	RP11-291L22.9	ENSG00000276805.2	Thyroid	C=0.798	T=0.202	0.325378	1.92109e-12
rs11511253	rs61840410	0.891125	0.993301	RP11-291L22.9	ENSG00000276805.2	Adipose - Visceral (Omentum)	C=0.798	T=0.202	0.392345	2.09136e-12
rs11511253	rs11146869	0.993439	1	RP11-291L22.9	ENSG00000276805.2	Esophagus - Mucosa	A=0.815	G=0.185	0.399664	2.13851e-12
rs11511253	rs61839284	0.993439	1	RP11-291L22.9	ENSG00000276805.2	Esophagus - Mucosa	A=0.815	C=0.185	0.399664	2.13851e-12
rs11511253	rs34019437	0.993439	1	RP11-291L22.9	ENSG00000276805.2	Esophagus - Mucosa	C=0.815	T=0.185	0.399664	2.13851e-12
rs11511253	rs4326715	0.993466	1	RP11-291L22.9	ENSG00000276805.2	Esophagus - Mucosa	A=0.813	G=0.187	0.399664	2.13851e-12
rs11511253	rs2310210	0.980362	0.993396	RP11-291L22.9	ENSG00000276805.2	Esophagus - Mucosa	G=0.815	A=0.185	0.399664	2.13851e-12
rs11511253	rs11011533	0.986895	1	RP11-291L22.9	ENSG00000276805.2	Thyroid	G=0.816	A=0.184	0.342425	2.2509e-12
rs11511253	rs10827860	0.986895	1	RP11-291L22.9	ENSG00000276805.2	Thyroid	G=0.816	A=0.184	0.342425	2.2509e-12
rs11511253	rs10827862	0.986895	1	RP11-291L22.9	ENSG00000276805.2	Thyroid	C=0.816	A=0.184	0.342425	2.2509e-12
rs11511253	rs7917312	0.986895	1	RP11-291L22.9	ENSG00000276805.2	Thyroid	C=0.816	T=0.184	0.342425	2.2509e-12
rs11511253	rs3970136	0.891125	0.993301	RP11-291L22.9	ENSG00000276805.2	Esophagus - Mucosa	T=0.798	C=0.202	0.381162	2.25545e-12
rs11511253	rs11146675	0.891125	0.993301	RP11-291L22.9	ENSG00000276805.2	Esophagus - Mucosa	G=0.798	T=0.202	0.381162	2.25545e-12
rs11511253	rs11511253	1	1	RP11-291L22.9	ENSG00000276805.2	Thyroid	G=0.814	A=0.186	0.34395	2.26509e-12
rs11511253	rs144280981	0.986906	0.993431	RP11-291L22.9	ENSG00000276805.2	Pancreas	C=0.814	T=0.186	0.562386	2.39094e-12
rs11511253	rs7093896	0.993439	1	RP11-291L22.9	ENSG00000276805.2	Pancreas	A=0.815	T=0.185	0.562386	2.39094e-12
rs11511253	rs3087759	0.993439	1	RP11-291L22.9	ENSG00000276805.2	Pancreas	A=0.815	C=0.185	0.562386	2.39094e-12
rs11511253	rs4934946	0.993439	1	RP11-291L22.9	ENSG00000276805.2	Pancreas	T=0.815	C=0.185	0.562386	2.39094e-12
rs11511253	rs11011555	0.993439	1	RP11-291L22.9	ENSG00000276805.2	Pancreas	T=0.815	C=0.185	0.562386	2.39094e-12
rs11511253	rs61837224	0.993439	1	RP11-291L22.9	ENSG00000276805.2	Pancreas	G=0.815	C=0.185	0.562386	2.39094e-12
rs11511253	rs117398853	0.993439	1	RP11-291L22.9	ENSG00000276805.2	Pancreas	C=0.815	G=0.185	0.562386	2.39094e-12
rs11511253	rs9663128	0.993439	1	RP11-291L22.9	ENSG00000276805.2	Pancreas	C=0.815	G=0.185	0.562386	2.39094e-12
rs11511253	rs7088208	0.986906	0.993431	RP11-291L22.9	ENSG00000276805.2	Pancreas	T=0.814	C=0.186	0.562386	2.39094e-12
rs11511253	rs117840800	0.993439	1	RP11-291L22.9	ENSG00000276805.2	Pancreas	A=0.815	G=0.185	0.562386	2.39094e-12
rs11511253	rs74890899	0.986895	1	RP11-291L22.9	ENSG00000276805.2	Pancreas	C=0.816	T=0.184	0.562386	2.39094e-12
rs11511253	rs1810634	0.993439	1	RP11-291L22.9	ENSG00000276805.2	Pancreas	A=0.815	G=0.185	0.562386	2.39094e-12
rs11511253	rs9664768	0.993439	1	RP11-291L22.9	ENSG00000276805.2	Pancreas	G=0.815	A=0.185	0.562386	2.39094e-12
rs11511253	rs72639568	0.993439	1	RP11-291L22.9	ENSG00000276805.2	Pancreas	G=0.815	A=0.185	0.562386	2.39094e-12
rs11511253	rs77114817	0.986895	1	RP11-291L22.9	ENSG00000276805.2	Pancreas	T=0.816	C=0.184	0.562386	2.39094e-12
rs11511253	rs11492515	0.993439	1	RP11-291L22.9	ENSG00000276805.2	Pancreas	C=0.815	T=0.185	0.562386	2.39094e-12
rs11511253	rs11492459	0.993439	1	RP11-291L22.9	ENSG00000276805.2	Pancreas	T=0.815	C=0.185	0.562386	2.39094e-12
rs11511253	rs200253039	0.993439	1	RP11-291L22.9	ENSG00000276805.2	Pancreas	C=0.815	T=0.185	0.562386	2.39094e-12
rs11511253	rs7084618	0.993439	1	RP11-291L22.9	ENSG00000276805.2	Pancreas	A=0.815	T=0.185	0.562386	2.39094e-12
rs11511253	rs7095113	0.993439	1	RP11-291L22.9	ENSG00000276805.2	Pancreas	G=0.815	A=0.185	0.562386	2.39094e-12
rs11511253	rs148773254	0.993439	1	RP11-291L22.9	ENSG00000276805.2	Pancreas	C=0.815	T=0.185	0.562386	2.39094e-12
rs11511253	rs12775030	0.993439	1	RP11-291L22.9	ENSG00000276805.2	Pancreas	C=0.815	T=0.185	0.562386	2.39094e-12
rs11511253	rs4623823	0.993439	1	RP11-291L22.9	ENSG00000276805.2	Pancreas	C=0.815	T=0.185	0.562386	2.39094e-12
rs11511253	rs35712971	0.993439	1	RP11-291L22.9	ENSG00000276805.2	Pancreas	A=0.815	T=0.185	0.562386	2.39094e-12
rs11511253	rs4572067	0.993439	1	RP11-291L22.9	ENSG00000276805.2	Pancreas	G=0.815	T=0.185	0.562386	2.39094e-12
rs11511253	rs11146911	1	1	RP11-291L22.9	ENSG00000276805.2	Pancreas	C=0.814	A=0.186	0.562386	2.39094e-12
rs11511253	rs11812823	0.986895	1	RP11-291L22.9	ENSG00000276805.2	Esophagus - Mucosa	T=0.816	C=0.184	0.402536	2.44108e-12
rs11511253	rs112309001	0.986895	1	RP11-291L22.9	ENSG00000276805.2	Esophagus - Mucosa	AG=0.816	A=0.184	0.402536	2.44108e-12
rs11511253	rs2012084	0.973898	0.986863	RP11-291L22.9	ENSG00000276805.2	Esophagus - Mucosa	T=0.814	C=0.186	0.402536	2.44108e-12
rs11511253	rs35747454	0.986895	1	RP11-291L22.9	ENSG00000276805.2	Esophagus - Mucosa	G=0.816	T=0.184	0.402536	2.44108e-12
rs11511253	rs12354584	0.986895	1	RP11-291L22.9	ENSG00000276805.2	Esophagus - Mucosa	G=0.816	T=0.184	0.402536	2.44108e-12
rs11511253	rs11511148	0.986895	1	RP11-291L22.9	ENSG00000276805.2	Esophagus - Mucosa	C=0.816	T=0.184	0.402536	2.44108e-12
rs11511253	rs11011567	0.986895	1	RP11-291L22.9	ENSG00000276805.2	Esophagus - Mucosa	A=0.816	G=0.184	0.402536	2.44108e-12
rs11511253	rs28413086	0.986895	1	RP11-291L22.9	ENSG00000276805.2	Esophagus - Mucosa	T=0.816	G=0.184	0.402536	2.44108e-12
rs11511253	rs35451472	0.986895	1	RP11-291L22.9	ENSG00000276805.2	Esophagus - Mucosa	C=0.816	T=0.184	0.402536	2.44108e-12
rs11511253	rs7070930	0.986895	1	RP11-291L22.9	ENSG00000276805.2	Esophagus - Mucosa	G=0.816	C=0.184	0.402536	2.44108e-12
rs11511253	rs80081575	0.986895	1	RP11-291L22.9	ENSG00000276805.2	Esophagus - Mucosa	G=0.816	A=0.184	0.402536	2.44108e-12
rs11511253	rs7076118	0.986895	1	RP11-291L22.9	ENSG00000276805.2	Esophagus - Mucosa	C=0.816	A=0.184	0.402536	2.44108e-12
rs11511253	rs200220357	0.993439	1	RP11-291L22.9	ENSG00000276805.2	Pancreas	C=0.815	T=0.185	0.570379	2.48677e-12
rs11511253	rs7095128	0.993439	1	RP11-291L22.9	ENSG00000276805.2	Pancreas	G=0.815	C=0.185	0.570379	2.48677e-12
rs11511253	rs3928516	0.993466	1	RP11-291L22.9	ENSG00000276805.2	Breast - Mammary Tissue	G=0.813	T=0.187	0.435008	2.53468e-12
rs11511253	rs79613030	0.993439	1	RP11-291L22.9	ENSG00000276805.2	Adipose - Visceral (Omentum)	G=0.815	A=0.185	0.40542	2.68516e-12
rs11511253	rs61839484	0.993439	1	RP11-291L22.9	ENSG00000276805.2	Adipose - Visceral (Omentum)	G=0.815	A=0.185	0.40542	2.68516e-12
rs11511253	rs11511253	1	1	RP11-291L22.9	ENSG00000276805.2	Breast - Mammary Tissue	G=0.814	A=0.186	0.439954	2.92454e-12
rs11511253	rs4088497	0.993466	1	RP11-291L22.9	ENSG00000276805.2	Breast - Mammary Tissue	T=0.813	C=0.187	0.439954	2.92454e-12
rs11511253	rs11011501	0.967321	0.993324	RP11-291L22.9	ENSG00000276805.2	Esophagus - Mucosa	G=0.817	A=0.183	0.400112	3.05674e-12
rs11511253	rs11011509	0.973833	0.99336	RP11-291L22.9	ENSG00000276805.2	Esophagus - Mucosa	G=0.816	A=0.184	0.400112	3.05674e-12
rs11511253	rs7100199	0.96737	0.986792	RP11-291L22.9	ENSG00000276805.2	Esophagus - Mucosa	T=0.815	C=0.185	0.400112	3.05674e-12
rs11511253	rs10764157	0.980366	1	RP11-291L22.9	ENSG00000276805.2	Esophagus - Mucosa	A=0.817	G=0.183	0.400112	3.05674e-12
rs11511253	rs2021018	0.980366	1	RP11-291L22.9	ENSG00000276805.2	Esophagus - Mucosa	G=0.817	A=0.183	0.400112	3.05674e-12
rs11511253	rs7071245	0.980366	1	RP11-291L22.9	ENSG00000276805.2	Esophagus - Mucosa	G=0.817	A=0.183	0.400112	3.05674e-12
rs11511253	rs10827863	0.980366	1	RP11-291L22.9	ENSG00000276805.2	Esophagus - Mucosa	T=0.817	C=0.183	0.400112	3.05674e-12
rs11511253	rs4088497	0.993466	1	RP11-291L22.9	ENSG00000276805.2	Adipose - Visceral (Omentum)	T=0.813	C=0.187	0.414956	3.06855e-12
rs11511253	rs200474745	0.974046	0.993415	RP11-291L22.9	ENSG00000276805.2	Thyroid	CGAATGGAATG=0.812	C=0.188	0.341519	3.09332e-12
rs11511253	rs7087510	0.891125	0.993301	RP11-291L22.9	ENSG00000276805.2	Pancreas	G=0.798	A=0.202	0.525888	3.11859e-12
rs11511253	rs138310998	0.891125	0.993301	RP11-291L22.9	ENSG00000276805.2	Pancreas	G=0.798	A=0.202	0.525888	3.11859e-12
rs11511253	rs12571329	0.891125	0.993301	RP11-291L22.9	ENSG00000276805.2	Pancreas	G=0.798	A=0.202	0.525888	3.11859e-12
rs11511253	rs7069025	0.891125	0.993301	RP11-291L22.9	ENSG00000276805.2	Pancreas	G=0.798	A=0.202	0.525888	3.11859e-12
rs11511253	rs12770432	0.891125	0.993301	RP11-291L22.9	ENSG00000276805.2	Pancreas	G=0.798	A=0.202	0.525888	3.11859e-12
rs11511253	rs11592779	0.872669	0.979927	RP11-291L22.9	ENSG00000276805.2	Pancreas	C=0.799	T=0.201	0.525888	3.11859e-12
rs11511253	rs4881586	0.86621	0.973269	RP11-291L22.9	ENSG00000276805.2	Pancreas	C=0.8	T=0.2	0.525888	3.11859e-12
rs11511253	rs7923903	0.879145	0.986601	RP11-291L22.9	ENSG00000276805.2	Pancreas	G=0.798	A=0.202	0.525888	3.11859e-12
rs11511253	rs7896006	0.879145	0.986601	RP11-291L22.9	ENSG00000276805.2	Pancreas	C=0.798	T=0.202	0.525888	3.11859e-12
rs11511253	rs7896545	0.879145	0.986601	RP11-291L22.9	ENSG00000276805.2	Pancreas	C=0.798	T=0.202	0.525888	3.11859e-12
rs11511253	rs7076099	0.879145	0.986601	RP11-291L22.9	ENSG00000276805.2	Pancreas	G=0.798	A=0.202	0.525888	3.11859e-12
rs11511253	rs35949805	0.896667	0.993309	RP11-291L22.9	ENSG00000276805.2	Esophagus - Mucosa	G=0.799	A=0.201	0.382572	3.25272e-12
rs11511253	rs2180800	0.980362	0.993396	RP11-291L22.9	ENSG00000276805.2	Pancreas	C=0.815	T=0.185	0.567307	3.2898e-12
rs11511253	rs11596501	0.986895	1	RP11-291L22.9	ENSG00000276805.2	Pancreas	G=0.816	A=0.184	0.567307	3.2898e-12
rs11511253	rs11011546	0.986895	1	RP11-291L22.9	ENSG00000276805.2	Pancreas	G=0.816	A=0.184	0.567307	3.2898e-12
rs11511253	rs2505217	0.665927	0.982068	SEPT7P9	ENSG00000120555.13	Testis	T=0.864	C=0.136	0.443144	3.35704e-12
rs11511253	rs2489495	0.672328	0.990968	SEPT7P9	ENSG00000120555.13	Testis	C=0.865	T=0.135	0.443144	3.35704e-12
rs11511253	rs11011533	0.986895	1	RP11-291L22.9	ENSG00000276805.2	Pancreas	G=0.816	A=0.184	0.557891	3.39277e-12
rs11511253	rs10827860	0.986895	1	RP11-291L22.9	ENSG00000276805.2	Pancreas	G=0.816	A=0.184	0.557891	3.39277e-12
rs11511253	rs10827862	0.986895	1	RP11-291L22.9	ENSG00000276805.2	Pancreas	C=0.816	A=0.184	0.557891	3.39277e-12
rs11511253	rs7917312	0.986895	1	RP11-291L22.9	ENSG00000276805.2	Pancreas	C=0.816	T=0.184	0.557891	3.39277e-12
rs11511253	rs11011543	0.986895	1	RP11-291L22.9	ENSG00000276805.2	Pancreas	A=0.816	T=0.184	0.557891	3.39277e-12
rs11511253	rs10827866	0.986895	1	RP11-291L22.9	ENSG00000276805.2	Pancreas	G=0.816	T=0.184	0.557891	3.39277e-12
rs11511253	rs66610970	0.986895	1	RP11-291L22.9	ENSG00000276805.2	Pancreas	CT=0.816	C=0.184	0.557891	3.39277e-12
rs11511253	rs138284504	0.986895	1	RP11-291L22.9	ENSG00000276805.2	Pancreas	C=0.816	T=0.184	0.557891	3.39277e-12
rs11511253	rs10827867	0.986895	1	RP11-291L22.9	ENSG00000276805.2	Pancreas	T=0.816	C=0.184	0.557891	3.39277e-12
rs11511253	rs11011542	0.980366	1	RP11-291L22.9	ENSG00000276805.2	Esophagus - Mucosa	C=0.817	T=0.183	0.400049	3.44427e-12
rs11511253	rs200235878	0.618043	0.908084	SEPT7P9	ENSG00000120555.13	Testis	T=0.854	C=0.146	0.424929	3.45711e-12
rs11511253	rs11146699	0.967718	0.993407	RP11-291L22.9	ENSG00000276805.2	Esophagus - Mucosa	G=0.811	A=0.189	0.397398	3.52655e-12
rs11511253	rs12571507	0.936072	0.980198	RP11-291L22.9	ENSG00000276805.2	Adipose - Visceral (Omentum)	C=0.81	T=0.19	0.401622	3.53142e-12
rs11511253	rs71500456	0.967718	0.993407	RP11-291L22.9	ENSG00000276805.2	Esophagus - Mucosa	C=0.811	T=0.189	0.410082	3.63126e-12
rs11511253	rs61837257	0.993439	1	RP11-291L22.9	ENSG00000276805.2	Pancreas	C=0.815	G=0.185	0.562386	3.76667e-12
rs9308098	rs36065861	0.880932	0.982561	KLHL2	ENSG00000109466.13	Adrenal Gland	C=0.856	T=0.144	-0.439199	3.91383e-12
rs11511253	rs111563184	0.891243	0.947169	RP11-291L22.9	ENSG00000276805.2	Esophagus - Muscularis	G=0.815	GC=0.185	0.439938	3.97643e-12
rs11511253	rs3928516	0.993466	1	RP11-291L22.9	ENSG00000276805.2	Esophagus - Muscularis	G=0.813	T=0.187	0.442276	3.98825e-12
rs11511253	rs4881618	0.993466	1	RP11-291L22.9	ENSG00000276805.2	Pancreas	G=0.813	T=0.187	0.561789	4.01644e-12
rs11511253	rs3970136	0.891125	0.993301	RP11-291L22.9	ENSG00000276805.2	Pancreas	T=0.798	C=0.202	0.538643	4.06809e-12
rs11511253	rs11146675	0.891125	0.993301	RP11-291L22.9	ENSG00000276805.2	Pancreas	G=0.798	T=0.202	0.538643	4.06809e-12
rs11511253	rs12358135	0.879145	0.986601	RP11-291L22.9	ENSG00000276805.2	Pancreas	C=0.798	T=0.202	0.538643	4.06809e-12
rs11511253	rs4070543	0.891125	0.993301	RP11-291L22.9	ENSG00000276805.2	Pancreas	G=0.798	A=0.202	0.519231	4.07472e-12
rs11511253	rs200253039	0.993439	1	SEPT7P9	ENSG00000120555.13	Nerve - Tibial	C=0.815	T=0.185	0.402854	4.14607e-12
rs11511253	rs7099107	0.967718	0.993407	RP11-291L22.9	ENSG00000276805.2	Adipose - Visceral (Omentum)	G=0.811	A=0.189	0.399662	4.19478e-12
rs11511253	rs74798172	0.879145	0.986601	RP11-291L22.9	ENSG00000276805.2	Esophagus - Mucosa	C=0.798	G=0.202	0.381888	4.22476e-12
rs11511253	rs12358135	0.879145	0.986601	RP11-291L22.9	ENSG00000276805.2	Adipose - Visceral (Omentum)	C=0.798	T=0.202	0.387231	4.32243e-12
rs11511253	rs11146894	0.986895	1	RP11-291L22.9	ENSG00000276805.2	Pancreas	G=0.816	A=0.184	0.562036	4.32851e-12
rs11511253	rs12570560	0.891125	0.993301	RP11-291L22.9	ENSG00000276805.2	Pancreas	C=0.798	G=0.202	0.521235	4.35751e-12
rs11511253	rs2180899	0.728744	1	RP11-291L22.9	ENSG00000276805.2	Cells - Cultured fibroblasts	G=0.761	A=0.239	0.381917	4.45227e-12
rs11511253	rs11597330	0.974276	1	RP11-291L22.9	ENSG00000276805.2	Adipose - Visceral (Omentum)	C=0.81	T=0.19	0.396446	4.81672e-12
rs11511253	rs201797049	0.684639	1	SEPT7P9	ENSG00000120555.13	Artery - Tibial	G=0.865	A=0.135	0.394341	4.82595e-12
rs11511253	rs61840410	0.891125	0.993301	SEPT7P9	ENSG00000120555.13	Nerve - Tibial	C=0.798	T=0.202	0.377664	4.84639e-12
rs11511253	rs35949805	0.896667	0.993309	RP11-291L22.9	ENSG00000276805.2	Pancreas	G=0.799	A=0.201	0.547916	4.91237e-12
rs11511253	rs111563184	0.891243	0.947169	RP11-291L22.9	ENSG00000276805.2	Adipose - Visceral (Omentum)	G=0.815	GC=0.185	0.395465	5.1205e-12
rs11511253	rs200253039	0.993439	1	RP11-291L22.9	ENSG00000276805.2	Esophagus - Muscularis	C=0.815	T=0.185	0.438334	5.13677e-12
rs11511253	rs12775030	0.993439	1	RP11-291L22.9	ENSG00000276805.2	Esophagus - Muscularis	C=0.815	T=0.185	0.438717	5.30604e-12
rs11511253	rs34873071	0.986895	1	RP11-291L22.9	ENSG00000276805.2	Esophagus - Mucosa	G=0.816	T=0.184	0.397106	5.31775e-12
rs11511253	rs58673518	0.986895	1	RP11-291L22.9	ENSG00000276805.2	Esophagus - Mucosa	G=0.816	T=0.184	0.397106	5.31775e-12
rs11511253	rs2085430	0.993439	1	RP11-291L22.9	ENSG00000276805.2	Esophagus - Mucosa	C=0.815	G=0.185	0.397106	5.31775e-12
rs11511253	rs10870459	0.986895	1	RP11-291L22.9	ENSG00000276805.2	Esophagus - Mucosa	A=0.816	G=0.184	0.397106	5.31775e-12
rs11511253	rs11146613	0.993439	1	RP11-291L22.9	ENSG00000276805.2	Esophagus - Mucosa	C=0.815	T=0.185	0.397106	5.31775e-12
rs11511253	rs182246855	0.973833	0.99336	RP11-291L22.9	ENSG00000276805.2	Esophagus - Mucosa	G=0.816	A=0.184	0.397106	5.31775e-12
rs11511253	rs12359136	0.986906	0.993431	RP11-291L22.9	ENSG00000276805.2	Esophagus - Mucosa	A=0.814	T=0.186	0.397106	5.31775e-12
rs11511253	rs11146640	0.993439	1	RP11-291L22.9	ENSG00000276805.2	Esophagus - Mucosa	G=0.815	A=0.185	0.397106	5.31775e-12
rs11511253	rs7087510	0.891125	0.993301	RP11-291L22.9	ENSG00000276805.2	Breast - Mammary Tissue	G=0.798	A=0.202	0.415319	5.66369e-12
rs11511253	rs138310998	0.891125	0.993301	RP11-291L22.9	ENSG00000276805.2	Breast - Mammary Tissue	G=0.798	A=0.202	0.415319	5.66369e-12
rs11511253	rs4070543	0.891125	0.993301	RP11-291L22.9	ENSG00000276805.2	Breast - Mammary Tissue	G=0.798	A=0.202	0.415319	5.66369e-12
rs11511253	rs12571329	0.891125	0.993301	RP11-291L22.9	ENSG00000276805.2	Breast - Mammary Tissue	G=0.798	A=0.202	0.415319	5.66369e-12
rs11511253	rs61840410	0.891125	0.993301	RP11-291L22.9	ENSG00000276805.2	Breast - Mammary Tissue	C=0.798	T=0.202	0.415319	5.66369e-12
rs11511253	rs7069025	0.891125	0.993301	RP11-291L22.9	ENSG00000276805.2	Breast - Mammary Tissue	G=0.798	A=0.202	0.415319	5.66369e-12
rs11511253	rs12770432	0.891125	0.993301	RP11-291L22.9	ENSG00000276805.2	Breast - Mammary Tissue	G=0.798	A=0.202	0.415319	5.66369e-12
rs11511253	rs11592779	0.872669	0.979927	RP11-291L22.9	ENSG00000276805.2	Breast - Mammary Tissue	C=0.799	T=0.201	0.415319	5.66369e-12
rs11511253	rs4881586	0.86621	0.973269	RP11-291L22.9	ENSG00000276805.2	Breast - Mammary Tissue	C=0.8	T=0.2	0.415319	5.66369e-12
rs11511253	rs7923903	0.879145	0.986601	RP11-291L22.9	ENSG00000276805.2	Breast - Mammary Tissue	G=0.798	A=0.202	0.415319	5.66369e-12
rs11511253	rs7896006	0.879145	0.986601	RP11-291L22.9	ENSG00000276805.2	Breast - Mammary Tissue	C=0.798	T=0.202	0.415319	5.66369e-12
rs11511253	rs7896545	0.879145	0.986601	RP11-291L22.9	ENSG00000276805.2	Breast - Mammary Tissue	C=0.798	T=0.202	0.415319	5.66369e-12
rs11511253	rs7076099	0.879145	0.986601	RP11-291L22.9	ENSG00000276805.2	Breast - Mammary Tissue	G=0.798	A=0.202	0.415319	5.66369e-12
rs11511253	rs4088497	0.993466	1	RP11-291L22.9	ENSG00000276805.2	Thyroid	T=0.813	C=0.187	0.342142	5.80367e-12
rs11511253	rs11146655	0.961177	0.986831	RP11-291L22.9	ENSG00000276805.2	Adipose - Visceral (Omentum)	A=0.812	G=0.188	0.405003	5.8169e-12
rs11511253	rs79613030	0.993439	1	RP11-291L22.9	ENSG00000276805.2	Breast - Mammary Tissue	G=0.815	A=0.185	0.43189	5.81892e-12
rs11511253	rs61839484	0.993439	1	RP11-291L22.9	ENSG00000276805.2	Breast - Mammary Tissue	G=0.815	A=0.185	0.43189	5.81892e-12
rs11511253	rs144280981	0.986906	0.993431	RP11-291L22.9	ENSG00000276805.2	Esophagus - Muscularis	C=0.814	T=0.186	0.437613	5.94694e-12
rs11511253	rs7093896	0.993439	1	RP11-291L22.9	ENSG00000276805.2	Esophagus - Muscularis	A=0.815	T=0.185	0.437613	5.94694e-12
rs11511253	rs3087759	0.993439	1	RP11-291L22.9	ENSG00000276805.2	Esophagus - Muscularis	A=0.815	C=0.185	0.437613	5.94694e-12
rs11511253	rs4934946	0.993439	1	RP11-291L22.9	ENSG00000276805.2	Esophagus - Muscularis	T=0.815	C=0.185	0.437613	5.94694e-12
rs11511253	rs11011555	0.993439	1	RP11-291L22.9	ENSG00000276805.2	Esophagus - Muscularis	T=0.815	C=0.185	0.437613	5.94694e-12
rs11511253	rs61837224	0.993439	1	RP11-291L22.9	ENSG00000276805.2	Esophagus - Muscularis	G=0.815	C=0.185	0.437613	5.94694e-12
rs11511253	rs117398853	0.993439	1	RP11-291L22.9	ENSG00000276805.2	Esophagus - Muscularis	C=0.815	G=0.185	0.437613	5.94694e-12
rs11511253	rs9663128	0.993439	1	RP11-291L22.9	ENSG00000276805.2	Esophagus - Muscularis	C=0.815	G=0.185	0.437613	5.94694e-12
rs11511253	rs7088208	0.986906	0.993431	RP11-291L22.9	ENSG00000276805.2	Esophagus - Muscularis	T=0.814	C=0.186	0.437613	5.94694e-12
rs11511253	rs117840800	0.993439	1	RP11-291L22.9	ENSG00000276805.2	Esophagus - Muscularis	A=0.815	G=0.185	0.437613	5.94694e-12
rs11511253	rs74890899	0.986895	1	RP11-291L22.9	ENSG00000276805.2	Esophagus - Muscularis	C=0.816	T=0.184	0.437613	5.94694e-12
rs11511253	rs1810634	0.993439	1	RP11-291L22.9	ENSG00000276805.2	Esophagus - Muscularis	A=0.815	G=0.185	0.437613	5.94694e-12
rs11511253	rs9664768	0.993439	1	RP11-291L22.9	ENSG00000276805.2	Esophagus - Muscularis	G=0.815	A=0.185	0.437613	5.94694e-12
rs11511253	rs72639568	0.993439	1	RP11-291L22.9	ENSG00000276805.2	Esophagus - Muscularis	G=0.815	A=0.185	0.437613	5.94694e-12
rs11511253	rs77114817	0.986895	1	RP11-291L22.9	ENSG00000276805.2	Esophagus - Muscularis	T=0.816	C=0.184	0.437613	5.94694e-12
rs11511253	rs11492515	0.993439	1	RP11-291L22.9	ENSG00000276805.2	Esophagus - Muscularis	C=0.815	T=0.185	0.437613	5.94694e-12
rs11511253	rs11492459	0.993439	1	RP11-291L22.9	ENSG00000276805.2	Esophagus - Muscularis	T=0.815	C=0.185	0.437613	5.94694e-12
rs11511253	rs7084618	0.993439	1	RP11-291L22.9	ENSG00000276805.2	Esophagus - Muscularis	A=0.815	T=0.185	0.437613	5.94694e-12
rs11511253	rs7095113	0.993439	1	RP11-291L22.9	ENSG00000276805.2	Esophagus - Muscularis	G=0.815	A=0.185	0.437613	5.94694e-12
rs11511253	rs148773254	0.993439	1	RP11-291L22.9	ENSG00000276805.2	Esophagus - Muscularis	C=0.815	T=0.185	0.437613	5.94694e-12
rs11511253	rs4623823	0.993439	1	RP11-291L22.9	ENSG00000276805.2	Esophagus - Muscularis	C=0.815	T=0.185	0.437613	5.94694e-12
rs11511253	rs35712971	0.993439	1	RP11-291L22.9	ENSG00000276805.2	Esophagus - Muscularis	A=0.815	T=0.185	0.437613	5.94694e-12
rs11511253	rs4572067	0.993439	1	RP11-291L22.9	ENSG00000276805.2	Esophagus - Muscularis	G=0.815	T=0.185	0.437613	5.94694e-12
rs11511253	rs11146911	1	1	RP11-291L22.9	ENSG00000276805.2	Esophagus - Muscularis	C=0.814	A=0.186	0.437613	5.94694e-12
rs11511253	rs10870362	0.993466	1	RP11-291L22.9	ENSG00000276805.2	Adipose - Visceral (Omentum)	G=0.813	A=0.187	0.406754	5.97357e-12
rs11511253	rs7089032	0.967718	0.993407	RP11-291L22.9	ENSG00000276805.2	Cells - Cultured fibroblasts	G=0.811	T=0.189	0.432443	6.04063e-12
rs11511253	rs11595308	1	1	RP11-291L22.9	ENSG00000276805.2	Pancreas	C=0.814	A=0.186	0.557126	6.0911e-12
rs11511253	rs11146621	0.993466	1	RP11-291L22.9	ENSG00000276805.2	Pancreas	G=0.813	A=0.187	0.557126	6.0911e-12
rs11511253	rs3928516	0.993466	1	RP11-291L22.9	ENSG00000276805.2	Pancreas	G=0.813	T=0.187	0.557126	6.0911e-12
rs11511253	rs2310211	0.993466	1	RP11-291L22.9	ENSG00000276805.2	Pancreas	G=0.813	A=0.187	0.557126	6.0911e-12
rs11511253	rs11011558	0.993439	1	SEPT7P9	ENSG00000120555.13	Nerve - Tibial	G=0.815	A=0.185	0.395926	6.10723e-12
rs11511253	rs71500469	0.967718	0.993407	RP11-291L22.9	ENSG00000276805.2	Adipose - Visceral (Omentum)	T=0.811	G=0.189	0.416456	6.14206e-12
rs11511253	rs79613030	0.993439	1	RP11-291L22.9	ENSG00000276805.2	Thyroid	G=0.815	A=0.185	0.335919	6.26766e-12
rs11511253	rs61839484	0.993439	1	RP11-291L22.9	ENSG00000276805.2	Thyroid	G=0.815	A=0.185	0.335919	6.26766e-12
rs11511253	rs2180899	0.728744	1	RP11-291L22.9	ENSG00000276805.2	Adipose - Visceral (Omentum)	G=0.761	A=0.239	0.363713	6.29259e-12
rs11511253	rs111563184	0.891243	0.947169	RP11-291L22.9	ENSG00000276805.2	Thyroid	G=0.815	GC=0.185	0.333661	6.32913e-12
rs11511253	rs200474745	0.974046	0.993415	RP11-291L22.9	ENSG00000276805.2	Adipose - Visceral (Omentum)	CGAATGGAATG=0.812	C=0.188	0.393618	6.33983e-12
rs11511253	rs61840410	0.891125	0.993301	RP11-291L22.9	ENSG00000276805.2	Pancreas	C=0.798	T=0.202	0.522511	6.54217e-12
rs11511253	rs4881586	0.86621	0.973269	SEPT7P9	ENSG00000120555.13	Nerve - Tibial	C=0.8	T=0.2	0.374628	6.89908e-12
rs11511253	rs61839915	0.980362	0.993396	RP11-291L22.9	ENSG00000276805.2	Pancreas	C=0.815	T=0.185	0.559427	7.06864e-12
rs11511253	rs7089593	0.980362	0.993396	RP11-291L22.9	ENSG00000276805.2	Pancreas	A=0.815	G=0.185	0.559427	7.06864e-12
rs11511253	rs7089975	0.980362	0.993396	RP11-291L22.9	ENSG00000276805.2	Pancreas	A=0.815	G=0.185	0.559427	7.06864e-12
rs11511253	rs7089032	0.967718	0.993407	RP11-291L22.9	ENSG00000276805.2	Breast - Mammary Tissue	G=0.811	T=0.189	0.440742	7.14051e-12
rs11511253	rs11814605	0.684639	1	SEPT7P9	ENSG00000120555.13	Artery - Tibial	A=0.865	G=0.135	0.393815	7.14162e-12
rs11511253	rs11598237	0.684639	1	SEPT7P9	ENSG00000120555.13	Testis	C=0.865	T=0.135	0.44514	7.16265e-12
rs11511253	rs7905850	0.684639	1	SEPT7P9	ENSG00000120555.13	Testis	T=0.865	A=0.135	0.44514	7.16265e-12
rs11511253	rs116385183	0.684639	1	SEPT7P9	ENSG00000120555.13	Testis	G=0.865	A=0.135	0.44514	7.16265e-12
rs11511253	rs11523362	0.690467	1	SEPT7P9	ENSG00000120555.13	Testis	C=0.864	T=0.136	0.44514	7.16265e-12
rs11511253	rs113246148	0.683968	0.991099	SEPT7P9	ENSG00000120555.13	Testis	G=0.863	A=0.137	0.44514	7.16265e-12
rs11511253	rs11146601	0.684639	1	SEPT7P9	ENSG00000120555.13	Testis	C=0.865	T=0.135	0.44514	7.16265e-12
rs11511253	rs11492601	0.683968	0.991099	SEPT7P9	ENSG00000120555.13	Testis	C=0.863	T=0.137	0.44514	7.16265e-12
rs11511253	rs59505605	0.683968	0.991099	SEPT7P9	ENSG00000120555.13	Testis	A=0.863	C=0.137	0.44514	7.16265e-12
rs11511253	rs4070543	0.891125	0.993301	SEPT7P9	ENSG00000120555.13	Nerve - Tibial	G=0.798	A=0.202	0.371744	7.16579e-12
rs11511253	rs12358135	0.879145	0.986601	RP11-291L22.9	ENSG00000276805.2	Thyroid	C=0.798	T=0.202	0.320308	7.30735e-12
[truncated: 11,581 more rows]
