# Supplementary material for: Investigation of clinical characteristics and genome associations in the ‘UK Lipoedema’ cohort
Source: PLoS One. 2022 Oct 13;17(10):e0274867. doi: 10.1371/journal.pone.0274867 (PMC9560129; doi:10.1371/journal.pone.0274867)
Supplement: S8 Table — Strong evidence signals for colocalization (SSP > 3.2, Bonferroni correction for 17 gene-tissue pairs tested for colocalization) are highlighted in bold face. (XLSX) [file pone.0274867.s009.xlsx]

## Sheet: S8 Table
Chr	Pos (hg38)	ID	Boundary (hg38)	Boundary Range	Significant Genes	Tissue	SSP
13	39111430	rs1409440	38861430-39361430	500kb	LHFP	Esophagus_Muscularis	4.88
13	39111430	rs1409440	38861430-39361430	500kb	LHFP	Pancreas	3.89
4	165159085	rs9308098	164909085-165409085	500kb	KLHL2	Adrenal_Gland	3.72
13	39111430	rs1409440	38861430-39361430	500kb	LHFP	Esophagus_Mucosa	1.54
13	39111430	rs1409440	38861430-39361430	500kb	LHFP	Spleen	1.38
13	39111430	rs1409440	38861430-39361430	500kb	LHFP	Skin_Sun_Exposed_Lower_leg	1.17
13	39111430	rs1409440	38861430-39361430	500kb	LHFP	Esophagus_Gastroesophageal_Junction	1.17
13	39111430	rs1409440	38861430-39361430	500kb	LHFP	Lung	0.864
4	165159085	rs9308098	164909085-165409085	500kb	KLHL2	Esophagus_Gastroesophageal_Junction	0.166
13	39111430	rs1409440	38861430-39361430	500kb	LHFP	Adipose_Subcutaneous	0.0838
4	165159085	rs9308098	164909085-165409085	500kb	KLHL2	Artery_Aorta	0.00538
4	165159085	rs9308098	164909085-165409085	500kb	KLHL2	Artery_Tibial	0.00344
4	165159085	rs9308098	164909085-165409085	500kb	RP11-219C20.3	Skin_Sun_Exposed_Lower_leg	7.3e-05
13	39111430	rs1409440	38861430-39361430	500kb	LHFP	Brain_Cerebellum	4.65e-05
13	39111430	rs1409440	38861430-39361430	500kb	NHLRC3	Esophagus_Mucosa	2.97e-05
2	145667963	rs16825349	144917963-146417963	1.5Mb	AC092484.1	Skin_Not_Sun_Exposed_Suprapubic	2.42e-05
13	39111430	rs1409440	38861430-39361430	500kb	STOML3	Lung	3.17e-06
